# Supplementary material
Source: publisher figshare collection journal article supplement (https://acs.figshare.com/ndownloader/files/6845022)
Supplement: Supplementary file 1 [file 6845022]

data_global
_audit_creation_date                               2015-06-29
_audit_creation_method                            'by CrystalStructure 4.1'
_audit_update_record                               ?

#==============================================================================
# PROCESSING SUMMARY (IUCr Office Use Only)

_journal_date_recd_electronic                      ?
_journal_date_from_coeditor                        ?
_journal_date_accepted                             ?
_journal_coeditor_code                             ?

#==============================================================================
# SUBMISSION DETAILS

_publ_contact_author_name             'Kensuke Naka'
_publ_contact_author_email            'kenaka@kit.ac.jp'
_publ_contact_author_fax              '+81-75-724-7534'
_publ_contact_author_phone            '+81-75-724-7534'
_publ_contact_author_address          'Goshokaido-cho, Matsugasaki, Sakyo-ku, Kyoto 606-8585, Japan'
_publ_contact_letter
;
    ENTER TEXT OF LETTER
;
_publ_requested_journal                           'ENTER JOURNAL NAME HERE'
_publ_requested_category
                                               'CHOOSE FI FM FO CI CM CO or AD'
_publ_requested_coeditor_name                      ?

#==============================================================================
# TITLE AND AUTHOR LIST

_publ_section_title
;
    ENTER SECTION TITLE
;
_publ_section_title_footnote
;
    ENTER FOOTNOTE TO TITLE OF PAPER
;
loop_
_publ_author_name
_publ_author_footnote
_publ_author_address
' FIRST AUTHORS NAME '
;
  FIRST AUTHORS FOOTNOTES
;
;
  FIRST AUTHORS ADDRESS
;
_publ_section_synopsis
;
    ENTER SYNOPSIS
;

#==============================================================================
# TEXT

_publ_section_abstract
;
    ENTER ABSTRACT
;
_publ_section_comment
;
    ENTER TEXT
;
_publ_section_references
;
    ENTER OTHER REFERENCES

    Rigaku (2014). CrystalStructure. Version 4.1. 
    Rigaku Corporation, Tokyo, Japan.

    Altomare, A., Cascarano, G., Giacovazzo, C. and Guagliardi, A. 
    (1993). J. Appl. Cryst. 26, 343-350.
    SIR92

    Rigaku (1995). ABSCOR. 
    Rigaku Corporation, Tokyo, Japan.

;
_publ_section_figure_captions
;
    ENTER FIGURE CAPTIONS
;
_publ_section_exptl_prep
;
    ENTER COMPOUND PREPARATION DETAILS
;
_publ_section_exptl_refinement
;
    ENTER SPECIAL DETAILS OF THE REFINEMENT
;

#==============================================================================
data_PtBr2-PhCl

#==============================================================================
# CHEMICAL DATA

_chemical_formula_sum                             'C42 H31 As2 Br2 Cl Pt'
_chemical_formula_moiety                          'C42 H31 As2 Br2 Cl Pt'
_chemical_formula_weight                           1075.90
_chemical_melting_point                            ?

#==============================================================================
# CRYSTAL DATA
_space_group_crystal_system                        triclinic
_space_group_name_H-M_alt                         'P -1'
_space_group_name_Hall                            '-P 1'
_space_group_IT_number                             2
loop_
_symmetry_equiv_pos_site_id
_space_group_symop_operation_xyz
1   '+X,+Y,+Z'
2   '-X,-Y,-Z'
#------------------------------------------------------------------------------
_cell_length_a                                     9.0753(3)
_cell_length_b                                     9.9531(3)
_cell_length_c                                     10.7614(3)
_cell_angle_alpha                                  100.7631(7)
_cell_angle_beta                                   94.6827(10)
_cell_angle_gamma                                  100.0884(10)
_cell_volume                                       933.58(5)
_cell_formula_units_Z                              1
_cell_measurement_reflns_used                      8237
_cell_measurement_theta_min                        3.15
_cell_measurement_theta_max                        27.45
_cell_measurement_temperature                      296
#------------------------------------------------------------------------------
_exptl_crystal_description                         block
_exptl_crystal_colour                              red
_exptl_crystal_size_max                            0.200
_exptl_crystal_size_mid                            0.200
_exptl_crystal_size_min                            0.100
_exptl_crystal_density_diffrn                      1.914
_exptl_crystal_density_meas                        ?
_exptl_crystal_density_method                     'not measured'
_exptl_crystal_F_000                               514.00
_exptl_absorpt_coefficient_mu                      7.749
_exptl_absorpt_correction_type                     multi-scan
_exptl_absorpt_process_details                    'ABSCOR (Rigaku, 1995)'
_exptl_absorpt_correction_T_min                    0.162
_exptl_absorpt_correction_T_max                    0.461

#==============================================================================
# EXPERIMENTAL DATA

_diffrn_ambient_temperature                        296
_diffrn_radiation_type                            'Mo K\a'
_diffrn_radiation_wavelength                       0.71075
_diffrn_measurement_device_type                   'Rigaku R-AXIS RAPID'
_diffrn_measurement_method                         \w
_diffrn_detector_area_resol_mean                   10.000
_diffrn_reflns_number                              9315
_diffrn_reflns_av_R_equivalents                    0.0398
_diffrn_reflns_theta_max                           27.446
_diffrn_reflns_theta_min                           3.157
_diffrn_reflns_theta_full                          25.242
_diffrn_measured_fraction_theta_max                0.995
_diffrn_measured_fraction_theta_full               0.998
_diffrn_reflns_Laue_measured_fraction_max          0.995
_diffrn_reflns_Laue_measured_fraction_full         0.998
_diffrn_reflns_point_group_measured_fraction_max   0.995
_diffrn_reflns_point_group_measured_fraction_full  0.998
_diffrn_reflns_limit_h_min                        -11
_diffrn_reflns_limit_h_max                         11
_diffrn_reflns_limit_k_min                        -11
_diffrn_reflns_limit_k_max                         12
_diffrn_reflns_limit_l_min                        -13
_diffrn_reflns_limit_l_max                         13
_diffrn_standards_number                           0
_diffrn_standards_interval_count                   .
_diffrn_standards_decay_%                          ?

#==============================================================================
# REFINEMENT DATA

_refine_special_details
;
    Refinement was performed using all reflections. The weighted 
    R-factor (wR) and goodness of fit (S) are based on F^2^.
    R-factor (gt) are based on F. The threshold expression of
    F^2^ > 2.0 sigma(F^2^) is used only for calculating R-factor (gt).
;
_reflns_number_total                               4238
_reflns_number_gt                                  3648
_reflns_threshold_expression                       F^2^>2.0\s(F^2^)
_refine_ls_structure_factor_coef                   Fsqd
_refine_ls_R_factor_all                            0.0476
_refine_ls_R_factor_gt                             0.0400
_refine_ls_wR_factor_ref                           0.1181
_refine_ls_wR_factor_gt                            0.0993
_refine_ls_number_restraints                       0
_refine_ls_hydrogen_treatment                      constr
_refine_ls_number_reflns                           4238
_refine_ls_number_parameters                       215
_refine_ls_goodness_of_fit_ref                     1.139
_refine_ls_weighting_scheme                        calc
_refine_ls_weighting_details
           'w = 1/[\s^2^(Fo^2^)+(0.0592P)^2^+0.8337P] where P=(Fo^2^+2Fc^2^)/3'
_atom_sites_solution_hydrogens                     geom
_atom_sites_solution_primary                       direct
_atom_sites_solution_secondary                     difmap
_refine_ls_shift/su_max                            0.000
_refine_diff_density_max                           2.94
_refine_diff_density_min                          -1.54
_refine_ls_extinction_method                       none
_refine_ls_extinction_coef                         ?

loop_
_atom_type_symbol
_atom_type_description
_atom_type_scat_dispersion_real
_atom_type_scat_dispersion_imag
_atom_type_scat_source
  'H' 'H'  0.0000 0.0000 
;
International Tables for Crystallography
(Vol. C, Table 6.1.1.4)
;
  'As' 'As'  0.0499 2.0058 
;
International Tables for Crystallography
(Vol. C, Tables 4.2.6.8 and 6.1.1.4)
;
  'Br' 'Br'  -0.2901 2.4595 
;
International Tables for Crystallography
(Vol. C, Tables 4.2.6.8 and 6.1.1.4)
;
  'Pt' 'Pt'  -1.7033 8.3905 
;
International Tables for Crystallography
(Vol. C, Tables 4.2.6.8 and 6.1.1.4)
;
  'C' 'C'  0.0033 0.0016 
;
International Tables for Crystallography
(Vol. C, Tables 4.2.6.8 and 6.1.1.4)
;
  'Cl' 'Cl'  0.1484 0.1585 
;
International Tables for Crystallography
(Vol. C, Tables 4.2.6.8 and 6.1.1.4)
;

#==============================================================================
# ATOMIC COORDINATES AND THERMAL PARAMETERS

loop_
_atom_site_label
_atom_site_type_symbol
_atom_site_fract_x
_atom_site_fract_y
_atom_site_fract_z
_atom_site_U_iso_or_equiv
_atom_site_adp_type
_atom_site_occupancy
_atom_site_site_symmetry_multiplicity
_atom_site_calc_flag
_atom_site_refinement_flags
_atom_site_disorder_assembly
_atom_site_disorder_group
 Pt1 Pt 0.0 0.0 1.0 0.03951(12) Uani 1 1 d . . .
 Br1 Br -0.07678(10) -0.16615(7) 0.79953(6) 0.0651(2) Uani 1 2 d . . .
 As1 As 0.12396(6) 0.15465(5) 0.87784(5) 0.03968(15) Uani 1 2 d . . .
 Cl1 Cl 0.3706(9) 0.5621(9) 0.7095(8) 0.0667(18) Uiso 0.25 2 d . . .
 Cl2 Cl 0.245(3) 0.358(2) 0.502(2) 0.192(8) Uiso 0.25 2 d . . .
 C1 C 0.0133(7) 0.2040(6) 0.7379(5) 0.0473(13) Uani 1 2 d . . .
 C2 C -0.0652(8) 0.1209(8) 0.6295(6) 0.0574(15) Uani 1 2 d . . .
 C3 C -0.1345(9) 0.1786(10) 0.5368(7) 0.073(2) Uani 1 2 d . . .
 C4 C -0.1249(10) 0.3194(10) 0.5599(8) 0.083(2) Uani 1 2 d . . .
 C5 C -0.0484(10) 0.4061(9) 0.6694(8) 0.075(2) Uani 1 2 d . . .
 C6 C 0.0245(7) 0.3510(7) 0.7609(6) 0.0528(15) Uani 1 2 d . . .
 C7 C 0.1225(8) 0.4299(6) 0.8768(6) 0.0529(15) Uani 1 2 d . . .
 C8 C 0.1561(10) 0.5757(7) 0.9166(8) 0.074(2) Uani 1 2 d . . .
 C9 C 0.2539(12) 0.6367(8) 1.0225(9) 0.083(3) Uani 1 2 d . . .
 C10 C 0.3248(11) 0.5570(8) 1.0901(8) 0.080(2) Uani 1 2 d . . .
 C11 C 0.2931(9) 0.4111(7) 1.0560(6) 0.0650(18) Uani 1 2 d . . .
 C12 C 0.1928(7) 0.3503(6) 0.9488(6) 0.0481(13) Uani 1 2 d . . .
 C13 C 0.2958(7) 0.0910(6) 0.8093(5) 0.0456(12) Uani 1 2 d . . .
 C14 C 0.3544(10) -0.0101(9) 0.8556(8) 0.079(2) Uani 1 2 d . . .
 C15 C 0.4824(12) -0.0513(11) 0.8086(11) 0.102(3) Uani 1 2 d . . .
 C16 C 0.5499(10) 0.0068(9) 0.7187(9) 0.088(3) Uani 1 2 d . . .
 C17 C 0.4916(10) 0.1100(9) 0.6735(8) 0.083(3) Uani 1 2 d . . .
 C18 C 0.3648(8) 0.1532(7) 0.7177(7) 0.0613(16) Uani 1 2 d . . .
 C19 C 0.372(3) 0.522(2) 0.653(2) 0.092(6) Uiso 0.5 2 d . . .
 C20 C 0.4008(16) 0.4084(13) 0.4528(13) 0.115(4) Uiso 1 2 d . . .
 C21 C 0.537(3) 0.607(2) 0.626(2) 0.094(6) Uiso 0.5 2 d . . .
 C22 C 0.349(4) 0.441(3) 0.553(3) 0.135(9) Uiso 0.5 2 d . . .
 C23 C 0.462(2) 0.538(2) 0.5921(18) 0.082(5) Uiso 0.5 2 d . . .
 H2 H -0.07288 0.02482 0.61689 0.0688 Uiso 1 2 calc R . .
 H3 H -0.1857 0.12237 0.4614 0.0879 Uiso 1 2 calc R . .
 H4 H -0.17193 0.35832 0.49935 0.0993 Uiso 1 2 calc R . .
 H5 H -0.04538 0.50165 0.68208 0.0897 Uiso 1 2 calc R . .
 H8 H 0.11107 0.63078 0.87011 0.0885 Uiso 1 2 calc R . .
 H9 H 0.27315 0.73308 1.04953 0.0996 Uiso 1 2 calc R . .
 H10 H 0.39528 0.60082 1.15993 0.0963 Uiso 1 2 calc R . .
 H11 H 0.33801 0.35724 1.10398 0.0780 Uiso 1 2 calc R . .
 H14 H 0.30954 -0.05105 0.91765 0.0952 Uiso 1 2 calc R . .
 H15 H 0.52189 -0.1202 0.83998 0.1228 Uiso 1 2 calc R . .
 H16 H 0.63433 -0.02229 0.6878 0.1055 Uiso 1 2 calc R . .
 H17 H 0.53811 0.15111 0.61233 0.0996 Uiso 1 2 calc R . .
 H18 H 0.32641 0.22277 0.68663 0.0735 Uiso 1 2 calc R . .


loop_
_atom_site_aniso_label
_atom_site_aniso_U_11
_atom_site_aniso_U_22
_atom_site_aniso_U_33
_atom_site_aniso_U_12
_atom_site_aniso_U_13
_atom_site_aniso_U_23
 Pt1 0.0468(2) 0.03379(17) 0.04092(17) 0.00784(12) 0.00742(11) 0.01407(12)
 Br1 0.0940(6) 0.0465(3) 0.0505(3) 0.0034(3) 0.0044(3) 0.0107(3)
 As1 0.0435(3) 0.0361(3) 0.0430(3) 0.0079(2) 0.0078(2) 0.0160(2)
 C1 0.043(3) 0.054(3) 0.053(3) 0.011(3) 0.013(2) 0.026(3)
 C2 0.058(4) 0.067(4) 0.049(3) 0.012(3) 0.008(3) 0.018(3)
 C3 0.063(5) 0.095(6) 0.066(4) 0.012(4) -0.000(3) 0.032(4)
 C4 0.082(6) 0.104(7) 0.082(5) 0.037(5) 0.008(4) 0.052(5)
 C5 0.080(6) 0.082(5) 0.079(5) 0.033(4) 0.014(4) 0.040(4)
 C6 0.053(4) 0.056(3) 0.064(4) 0.023(3) 0.021(3) 0.033(3)
 C7 0.069(4) 0.041(3) 0.060(3) 0.018(3) 0.030(3) 0.022(3)
 C8 0.099(6) 0.046(3) 0.093(6) 0.025(4) 0.036(5) 0.035(4)
 C9 0.120(8) 0.041(3) 0.090(6) 0.012(4) 0.031(5) 0.012(4)
 C10 0.100(7) 0.054(4) 0.073(5) -0.012(4) 0.020(4) -0.003(4)
 C11 0.079(5) 0.056(4) 0.059(4) 0.010(3) 0.004(3) 0.012(3)
 C12 0.047(3) 0.037(3) 0.062(3) 0.002(2) 0.017(3) 0.016(3)
 C13 0.042(3) 0.047(3) 0.048(3) 0.011(2) 0.008(2) 0.008(2)
 C14 0.080(6) 0.087(6) 0.090(5) 0.036(5) 0.029(4) 0.038(5)
 C15 0.095(7) 0.105(7) 0.133(8) 0.064(6) 0.034(6) 0.039(7)
 C16 0.071(6) 0.082(6) 0.112(7) 0.029(5) 0.027(5) 0.003(5)
 C17 0.075(6) 0.082(5) 0.089(6) 0.004(4) 0.041(4) 0.007(5)
 C18 0.061(4) 0.059(4) 0.070(4) 0.014(3) 0.021(3) 0.023(3)

#==============================================================================
_computing_data_collection                        'RAPID AUTO (Rigaku, ????)'
_computing_cell_refinement                        'RAPID AUTO'
_computing_data_reduction                         'RAPID AUTO'
_computing_structure_solution
                                               'SIR92 (Altomare, et al., 1994)'
_computing_structure_refinement                   'SHELXL97 (Sheldrick, 2008)'
_computing_publication_material
                                          'CrystalStructure 4.1 (Rigaku, 2014)'
_computing_molecular_graphics                     'CrystalStructure 4.1'

#==============================================================================
# MOLECULAR GEOMETRY

_geom_special_details
;
    ENTER SPECIAL DETAILS OF THE MOLECULAR GEOMETRY
;

loop_
_geom_bond_atom_site_label_1
_geom_bond_atom_site_label_2
_geom_bond_distance
_geom_bond_publ_flag
_geom_bond_site_symmetry_1
_geom_bond_site_symmetry_2
Pt1 Br1 2.4275(6) yes . .
Pt1 Br1 2.4275(6) yes . 2_557
Pt1 As1 2.3987(6) yes . .
Pt1 As1 2.3987(6) yes . 2_557
As1 C1 1.929(6) yes . .
As1 C12 1.925(5) yes . .
As1 C13 1.933(6) yes . .
Cl1 C21 1.85(3) yes . .
Cl1 C22 1.85(3) yes . .
Cl1 C23 1.57(2) yes . .
Cl2 C19 2.16(3) yes . .
Cl2 C20 1.59(3) yes . .
Cl2 C22 1.17(4) yes . .
C1 C2 1.360(8) yes . .
C1 C6 1.421(9) yes . .
C2 C3 1.400(12) yes . .
C3 C4 1.362(14) yes . .
C4 C5 1.375(11) yes . .
C5 C6 1.390(12) yes . .
C6 C7 1.474(8) yes . .
C7 C8 1.405(9) yes . .
C7 C12 1.400(10) yes . .
C8 C9 1.358(12) yes . .
C9 C10 1.375(13) yes . .
C10 C11 1.401(10) yes . .
C11 C12 1.379(9) yes . .
C13 C14 1.370(12) yes . .
C13 C18 1.393(10) yes . .
C14 C15 1.399(15) yes . .
C15 C16 1.352(16) yes . .
C16 C17 1.381(14) yes . .
C17 C18 1.386(12) yes . .
C19 C21 1.66(3) yes . .
C19 C22 1.19(4) yes . .
C19 C23 1.10(3) yes . .
C20 C21 1.06(3) yes . 2_666
C20 C22 1.23(4) yes . .
C20 C23 1.76(2) yes . .
C20 C23 1.43(3) yes . 2_666
C21 C23 0.88(3) yes . .
C22 C23 1.26(4) yes . .
C2 H2 0.930 no . .
C3 H3 0.930 no . .
C4 H4 0.930 no . .
C5 H5 0.930 no . .
C8 H8 0.930 no . .
C9 H9 0.930 no . .
C10 H10 0.930 no . .
C11 H11 0.930 no . .
C14 H14 0.930 no . .
C15 H15 0.930 no . .
C16 H16 0.930 no . .
C17 H17 0.930 no . .
C18 H18 0.930 no . .

loop_
_geom_angle_atom_site_label_1
_geom_angle_atom_site_label_2
_geom_angle_atom_site_label_3
_geom_angle
_geom_angle_publ_flag
_geom_angle_site_symmetry_1
_geom_angle_site_symmetry_2
_geom_angle_site_symmetry_3
Br1 Pt1 Br1 180.00(4) yes . . 2_557
Br1 Pt1 As1 86.48(2) yes . . .
Br1 Pt1 As1 93.52(2) yes . . 2_557
Br1 Pt1 As1 93.52(2) yes 2_557 . .
Br1 Pt1 As1 86.48(2) yes 2_557 . 2_557
As1 Pt1 As1 180.00(2) yes . . 2_557
Pt1 As1 C1 120.75(18) yes . . .
Pt1 As1 C12 121.3(2) yes . . .
Pt1 As1 C13 112.11(19) yes . . .
C1 As1 C12 88.7(3) yes . . .
C1 As1 C13 105.4(3) yes . . .
C12 As1 C13 105.4(2) yes . . .
C21 Cl1 C22 70.7(13) yes . . .
C21 Cl1 C23 28.5(9) yes . . .
C22 Cl1 C23 42.1(13) yes . . .
C19 Cl2 C20 73.8(11) yes . . .
C19 Cl2 C22 23.7(19) yes . . .
C20 Cl2 C22 50(2) yes . . .
As1 C1 C2 129.6(5) yes . . .
As1 C1 C6 109.5(4) yes . . .
C2 C1 C6 120.9(6) yes . . .
C1 C2 C3 120.7(7) yes . . .
C2 C3 C4 118.2(7) yes . . .
C3 C4 C5 122.6(9) yes . . .
C4 C5 C6 119.9(8) yes . . .
C1 C6 C5 117.7(6) yes . . .
C1 C6 C7 115.4(6) yes . . .
C5 C6 C7 126.7(6) yes . . .
C6 C7 C8 125.9(7) yes . . .
C6 C7 C12 115.8(5) yes . . .
C8 C7 C12 118.3(6) yes . . .
C7 C8 C9 120.3(8) yes . . .
C8 C9 C10 120.5(7) yes . . .
C9 C10 C11 121.4(7) yes . . .
C10 C11 C12 117.5(7) yes . . .
As1 C12 C7 110.2(4) yes . . .
As1 C12 C11 127.9(5) yes . . .
C7 C12 C11 121.9(5) yes . . .
As1 C13 C14 119.9(5) yes . . .
As1 C13 C18 120.0(5) yes . . .
C14 C13 C18 120.0(7) yes . . .
C13 C14 C15 119.3(9) yes . . .
C14 C15 C16 121.5(10) yes . . .
C15 C16 C17 119.0(9) yes . . .
C16 C17 C18 121.1(9) yes . . .
C13 C18 C17 119.1(7) yes . . .
Cl2 C19 C21 118.3(16) yes . . .
Cl2 C19 C22 23.1(19) yes . . .
Cl2 C19 C23 89.2(17) yes . . .
C21 C19 C22 95(2) yes . . .
C21 C19 C23 29.1(13) yes . . .
C22 C19 C23 66(2) yes . . .
Cl2 C20 C21 143.3(16) yes . . 2_666
Cl2 C20 C22 46.8(17) yes . . .
Cl2 C20 C23 92.1(13) yes . . .
Cl2 C20 C23 176.4(17) yes . . 2_666
C21 C20 C22 170(2) yes 2_666 . .
C21 C20 C23 124.5(16) yes 2_666 . .
C21 C20 C23 38.1(14) yes 2_666 . 2_666
C22 C20 C23 45.4(16) yes . . .
C22 C20 C23 131.9(18) yes . . 2_666
C23 C20 C23 86.4(12) yes . . 2_666
Cl1 C21 C19 20.9(9) yes . . .
Cl1 C21 C20 151.9(17) yes . . 2_666
Cl1 C21 C23 58.0(19) yes . . .
C19 C21 C20 131.1(19) yes . . 2_666
C19 C21 C23 37.1(19) yes . . .
C20 C21 C23 94(2) yes 2_666 . .
Cl1 C22 Cl2 129(3) yes . . .
Cl1 C22 C19 4.0(13) yes . . .
Cl1 C22 C20 147(2) yes . . .
Cl1 C22 C23 57.0(15) yes . . .
Cl2 C22 C19 133(4) yes . . .
Cl2 C22 C20 83(2) yes . . .
Cl2 C22 C23 171(4) yes . . .
C19 C22 C20 143(3) yes . . .
C19 C22 C23 53.1(19) yes . . .
C20 C22 C23 90(3) yes . . .
Cl1 C23 C19 20.3(12) yes . . .
Cl1 C23 C20 125.0(14) yes . . .
Cl1 C23 C20 141.4(14) yes . . 2_666
Cl1 C23 C21 94(2) yes . . .
Cl1 C23 C22 81(2) yes . . .
C19 C23 C20 104.7(17) yes . . .
C19 C23 C20 161.7(19) yes . . 2_666
C19 C23 C21 114(3) yes . . .
C19 C23 C22 61(2) yes . . .
C20 C23 C20 93.6(12) yes . . 2_666
C20 C23 C21 141(3) yes . . .
C20 C23 C22 44.2(17) yes . . .
C20 C23 C21 47.9(19) yes 2_666 . .
C20 C23 C22 138(2) yes 2_666 . .
C21 C23 C22 174(3) yes . . .
C1 C2 H2 119.670 no . . .
C3 C2 H2 119.670 no . . .
C2 C3 H3 120.906 no . . .
C4 C3 H3 120.917 no . . .
C3 C4 H4 118.687 no . . .
C5 C4 H4 118.688 no . . .
C4 C5 H5 120.030 no . . .
C6 C5 H5 120.038 no . . .
C7 C8 H8 119.831 no . . .
C9 C8 H8 119.828 no . . .
C8 C9 H9 119.734 no . . .
C10 C9 H9 119.730 no . . .
C9 C10 H10 119.321 no . . .
C11 C10 H10 119.326 no . . .
C10 C11 H11 121.228 no . . .
C12 C11 H11 121.233 no . . .
C13 C14 H14 120.336 no . . .
C15 C14 H14 120.333 no . . .
C14 C15 H15 119.267 no . . .
C16 C15 H15 119.262 no . . .
C15 C16 H16 120.512 no . . .
C17 C16 H16 120.505 no . . .
C16 C17 H17 119.444 no . . .
C18 C17 H17 119.443 no . . .
C13 C18 H18 120.464 no . . .
C17 C18 H18 120.457 no . . .

loop_
_geom_torsion_atom_site_label_1
_geom_torsion_atom_site_label_2
_geom_torsion_atom_site_label_3
_geom_torsion_atom_site_label_4
_geom_torsion
_geom_torsion_publ_flag
_geom_torsion_site_symmetry_1
_geom_torsion_site_symmetry_2
_geom_torsion_site_symmetry_3
_geom_torsion_site_symmetry_4
Pt1 As1 C1 C2 -59.8(6) no . . . .
Pt1 As1 C1 C6 120.9(3) no . . . .
Pt1 As1 C12 C7 -120.2(3) no . . . .
Pt1 As1 C12 C11 58.3(6) no . . . .
Pt1 As1 C13 C14 -14.9(4) no . . . .
Pt1 As1 C13 C18 168.4(3) no . . . .
C1 As1 C12 C7 5.6(4) no . . . .
C1 As1 C12 C11 -175.9(5) no . . . .
C12 As1 C1 C2 174.0(5) no . . . .
C12 As1 C1 C6 -5.3(4) no . . . .
C1 As1 C13 C14 -148.1(3) no . . . .
C1 As1 C13 C18 35.3(4) no . . . .
C13 As1 C1 C2 68.4(5) no . . . .
C13 As1 C1 C6 -110.9(4) no . . . .
C12 As1 C13 C14 118.9(4) no . . . .
C12 As1 C13 C18 -57.7(4) no . . . .
C13 As1 C12 C7 111.2(4) no . . . .
C13 As1 C12 C11 -70.3(5) no . . . .
C21 Cl1 C22 Cl2 -172(4) no . . . .
C21 Cl1 C22 C20 -3(5) no . . . .
C21 Cl1 C22 C23 -0.3(12) no . . . .
C22 Cl1 C21 C19 -1.5(14) no . . . .
C22 Cl1 C21 C20 1(4) no . . . 2_666
C22 Cl1 C21 C23 0.4(17) no . . . .
C21 Cl1 C23 C19 177(3) no . . . .
C21 Cl1 C23 C20 -179(4) no . . . .
C21 Cl1 C23 C20 -0(2) no . . . 2_666
C21 Cl1 C23 C21 0.0(17) no . . . .
C21 Cl1 C23 C22 179(3) no . . . .
C23 Cl1 C21 C19 -2(2) no . . . .
C23 Cl1 C21 C20 0(4) no . . . 2_666
C23 Cl1 C21 C23 0.0(18) no . . . .
C22 Cl1 C23 C19 -2(2) no . . . .
C22 Cl1 C23 C20 1.3(18) no . . . .
C22 Cl1 C23 C20 -180(4) no . . . 2_666
C22 Cl1 C23 C21 -179(3) no . . . .
C22 Cl1 C23 C22 0.0(17) no . . . .
C23 Cl1 C22 Cl2 -172(5) no . . . .
C23 Cl1 C22 C20 -3(4) no . . . .
C23 Cl1 C22 C23 0.0(13) no . . . .
C19 Cl2 C20 C21 -178(3) no . . . 2_666
C19 Cl2 C20 C22 2.4(9) no . . . .
C19 Cl2 C20 C23 -2.1(9) no . . . .
C20 Cl2 C19 C21 4.9(18) no . . . .
C20 Cl2 C19 C22 -4.6(17) no . . . .
C20 Cl2 C19 C23 3.3(15) no . . . .
C19 Cl2 C22 Cl1 -0(2) no . . . .
C19 Cl2 C22 C19 0.0(17) no . . . .
C19 Cl2 C22 C20 -174(6) no . . . .
C22 Cl2 C19 C21 9(5) no . . . .
C22 Cl2 C19 C22 0(5) no . . . .
C22 Cl2 C19 C23 8(5) no . . . .
C20 Cl2 C22 Cl1 174(5) no . . . .
C20 Cl2 C22 C19 174(6) no . . . .
C20 Cl2 C22 C20 0.0(7) no . . . .
C22 Cl2 C20 C21 179(4) no . . . 2_666
C22 Cl2 C20 C22 0(2) no . . . .
C22 Cl2 C20 C23 -4(3) no . . . .
As1 C1 C2 C3 -178.0(4) no . . . .
As1 C1 C6 C5 179.8(4) no . . . .
As1 C1 C6 C7 4.0(7) no . . . .
C2 C1 C6 C5 0.4(9) no . . . .
C2 C1 C6 C7 -175.4(5) no . . . .
C6 C1 C2 C3 1.3(10) no . . . .
C1 C2 C3 C4 -2.0(11) no . . . .
C2 C3 C4 C5 0.9(13) no . . . .
C3 C4 C5 C6 0.7(13) no . . . .
C4 C5 C6 C1 -1.4(11) no . . . .
C4 C5 C6 C7 173.8(7) no . . . .
C1 C6 C7 C8 177.2(6) no . . . .
C1 C6 C7 C12 0.4(9) no . . . .
C5 C6 C7 C8 1.8(12) no . . . .
C5 C6 C7 C12 -175.0(7) no . . . .
C6 C7 C8 C9 -176.9(7) no . . . .
C6 C7 C12 As1 -4.6(8) no . . . .
C6 C7 C12 C11 176.8(5) no . . . .
C8 C7 C12 As1 178.4(6) no . . . .
C8 C7 C12 C11 -0.3(10) no . . . .
C12 C7 C8 C9 -0.2(11) no . . . .
C7 C8 C9 C10 1.9(14) no . . . .
C8 C9 C10 C11 -3.2(15) no . . . .
C9 C10 C11 C12 2.7(13) no . . . .
C10 C11 C12 As1 -179.3(6) no . . . .
C10 C11 C12 C7 -1.0(11) no . . . .
As1 C13 C14 C15 -177.5(4) no . . . .
As1 C13 C18 C17 177.4(3) no . . . .
C14 C13 C18 C17 0.8(8) no . . . .
C18 C13 C14 C15 -0.9(9) no . . . .
C13 C14 C15 C16 0.2(12) no . . . .
C14 C15 C16 C17 0.6(12) no . . . .
C15 C16 C17 C18 -0.7(12) no . . . .
C16 C17 C18 C13 0.0(10) no . . . .
Cl2 C19 C21 Cl1 174(4) no . . . .
Cl2 C19 C21 C20 -5(4) no . . . 2_666
Cl2 C19 C21 C23 -3(2) no . . . .
Cl2 C19 C22 Cl2 0.0(18) no . . . .
Cl2 C19 C22 C20 170(10) no . . . .
Cl2 C19 C22 C23 171(5) no . . . .
Cl2 C19 C23 Cl1 174(4) no . . . .
Cl2 C19 C23 C20 -3.0(17) no . . . .
Cl2 C19 C23 C21 177(2) no . . . .
Cl2 C19 C23 C22 -3.4(9) no . . . .
C21 C19 C22 Cl2 -172(4) no . . . .
C21 C19 C22 C20 -1(6) no . . . .
C21 C19 C22 C23 -0.2(13) no . . . .
C22 C19 C21 Cl1 178(4) no . . . .
C22 C19 C21 C20 -1(4) no . . . 2_666
C22 C19 C21 C23 0(2) no . . . .
C21 C19 C23 Cl1 -3(6) no . . . .
C21 C19 C23 C20 180(4) no . . . .
C21 C19 C23 C21 0.0(18) no . . . .
C21 C19 C23 C22 180(3) no . . . .
C23 C19 C21 Cl1 177(5) no . . . .
C23 C19 C21 C20 -1(3) no . . . 2_666
C23 C19 C21 C23 0(3) no . . . .
C22 C19 C23 Cl1 177(5) no . . . .
C22 C19 C23 C20 0(2) no . . . .
C22 C19 C23 C21 -180(3) no . . . .
C22 C19 C23 C22 -0(2) no . . . .
C23 C19 C22 Cl2 -171(5) no . . . .
C23 C19 C22 C20 -1(5) no . . . .
C23 C19 C22 C23 0.0(13) no . . . .
Cl2 C20 C21 Cl1 175(3) no . . 2_666 2_666
Cl2 C20 C21 C19 174(2) no . . 2_666 2_666
Cl2 C20 C21 C23 175(3) no . . 2_666 2_666
Cl2 C20 C22 Cl1 -171(7) no . . . .
Cl2 C20 C22 Cl2 0.0(14) no . . . .
Cl2 C20 C22 C19 -173(7) no . . . .
Cl2 C20 C22 C23 -174(4) no . . . .
Cl2 C20 C23 Cl1 3(2) no . . . .
Cl2 C20 C23 C19 4.1(19) no . . . .
Cl2 C20 C23 C20 -176.7(15) no . . . 2_666
Cl2 C20 C23 C21 -176(3) no . . . .
Cl2 C20 C23 C22 4.6(13) no . . . .
C21 C20 C23 Cl1 180(2) no 2_666 . . .
C21 C20 C23 C19 -179(2) no 2_666 . . .
C21 C20 C23 C20 0(3) no 2_666 . . 2_666
C21 C20 C23 C21 1(5) no 2_666 . . .
C21 C20 C23 C22 -178(2) no 2_666 . . .
C23 C20 C21 Cl1 -1(6) no . . 2_666 2_666
C23 C20 C21 C19 -1(4) no . . 2_666 2_666
C23 C20 C21 C23 -1(3) no . . 2_666 2_666
C21 C20 C23 Cl1 -0(3) no 2_666 . 2_666 2_666
C21 C20 C23 C20 -179(3) no 2_666 . 2_666 2_666
C21 C20 C23 C21 0(2) no 2_666 . 2_666 2_666
C21 C20 C23 C22 179(4) no 2_666 . 2_666 2_666
C23 C20 C21 Cl1 0(3) no 2_666 . 2_666 2_666
C23 C20 C21 C19 -0.8(18) no 2_666 . 2_666 2_666
C23 C20 C21 C23 0.0(15) no 2_666 . 2_666 2_666
C22 C20 C23 Cl1 -2(3) no . . . .
C22 C20 C23 C19 -1(3) no . . . .
C22 C20 C23 C20 179(3) no . . . 2_666
C22 C20 C23 C21 179(5) no . . . .
C22 C20 C23 C22 0(2) no . . . .
C23 C20 C22 Cl1 2(4) no . . . .
C23 C20 C22 Cl2 174(4) no . . . .
C23 C20 C22 C19 1(4) no . . . .
C23 C20 C22 C23 -0.0(11) no . . . .
C22 C20 C23 Cl1 178(3) no . . 2_666 2_666
C22 C20 C23 C20 -1(3) no . . 2_666 2_666
C22 C20 C23 C21 178(3) no . . 2_666 2_666
C22 C20 C23 C22 -3(5) no . . 2_666 2_666
C23 C20 C22 Cl1 4(7) no 2_666 . . .
C23 C20 C22 Cl2 175(2) no 2_666 . . .
C23 C20 C22 C19 2(7) no 2_666 . . .
C23 C20 C22 C23 2(4) no 2_666 . . .
C23 C20 C23 Cl1 179(3) no . . 2_666 2_666
C23 C20 C23 C20 0.0(12) no . . 2_666 2_666
C23 C20 C23 C21 179.4(18) no . . 2_666 2_666
C23 C20 C23 C22 -1(3) no . . 2_666 2_666
C23 C20 C23 Cl1 179.4(19) no 2_666 . . .
C23 C20 C23 C19 -179.2(18) no 2_666 . . .
C23 C20 C23 C20 0.0(15) no 2_666 . . 2_666
C23 C20 C23 C21 1(4) no 2_666 . . .
C23 C20 C23 C22 -178.7(16) no 2_666 . . .
Cl1 C21 C23 Cl1 0.0(3) no . . . .
Cl1 C21 C23 C19 -1.1(13) no . . . .
Cl1 C21 C23 C20 179(5) no . . . .
Cl1 C21 C23 C20 179.9(17) no . . . 2_666
C19 C21 C23 Cl1 1.1(19) no . . . .
C19 C21 C23 C19 0.0(15) no . . . .
C19 C21 C23 C20 -180(6) no . . . .
C19 C21 C23 C20 -179(3) no . . . 2_666
C20 C21 C23 Cl1 -179.9(18) no 2_666 . . .
C20 C21 C23 C19 179(2) no 2_666 . . .
C20 C21 C23 C20 -1(5) no 2_666 . . .
C20 C21 C23 C20 0.0(8) no 2_666 . . 2_666
Cl1 C22 C23 Cl1 0.0(4) no . . . .
Cl1 C22 C23 C19 1.0(8) no . . . .
Cl1 C22 C23 C20 -178(2) no . . . .
Cl1 C22 C23 C20 180(4) no . . . 2_666
C19 C22 C23 Cl1 -1.0(17) no . . . .
C19 C22 C23 C19 0.0(16) no . . . .
C19 C22 C23 C20 -179(3) no . . . .
C19 C22 C23 C20 179(4) no . . . 2_666
C20 C22 C23 Cl1 178(2) no . . . .
C20 C22 C23 C19 179(3) no . . . .
C20 C22 C23 C20 0.0(7) no . . . .
C20 C22 C23 C20 -2(5) no . . . 2_666

loop_
_geom_contact_atom_site_label_1
_geom_contact_atom_site_label_2
_geom_contact_distance
_geom_contact_publ_flag
_geom_contact_site_symmetry_1
_geom_contact_site_symmetry_2
Br1 C11 3.528(8) no . 2_557
Cl2 C20 3.56(3) no . 2_666
C1 C4 2.737(12) no . .
C1 C18 3.334(10) no . .
C2 C5 2.766(12) no . .
C3 C6 2.804(9) no . .
C5 C8 3.129(10) no . .
C7 C10 2.766(10) no . .
C8 C11 2.795(12) no . .
C9 C12 2.755(9) no . .
C12 C18 3.516(10) no . .
C13 C16 2.777(12) no . .
C14 C17 2.752(13) no . .
C15 C18 2.752(14) no . .
C19 C21 3.28(3) no . 2_666
C19 C22 3.52(4) no . 2_666
C19 C23 3.16(3) no . 2_666
C21 C21 3.07(3) no . 2_666
C22 C22 3.18(5) no . 2_666
Br1 Cl2 3.52(2) no . 2_556
Cl1 C7 3.248(11) no . .
Cl1 C8 3.076(13) no . .
Cl1 C9 3.597(13) no . .
Cl2 Br1 3.52(2) no . 2_556
Cl2 C4 3.43(3) no . .
Cl2 C5 3.38(3) no . .
Cl2 C6 3.56(3) no . .
Cl2 C18 3.58(3) no . .
C4 Cl2 3.43(3) no . .
C5 Cl2 3.38(3) no . .
C6 Cl2 3.56(3) no . .
C6 C9 3.577(13) no . 2_567
C7 Cl1 3.248(11) no . .
C7 C8 3.501(12) no . 2_567
C7 C19 3.57(3) no . .
C8 Cl1 3.076(13) no . .
C8 C7 3.501(12) no . 2_567
C8 C19 3.59(3) no . .
C9 Cl1 3.597(13) no . .
C9 C6 3.577(13) no . 2_567
C18 Cl2 3.58(3) no . .
C19 C7 3.57(3) no . .
C19 C8 3.59(3) no . .
Pt1 H14 3.1102 no . .
Pt1 H14 3.1102 no . 2_557
Br1 H2 2.9766 no . .
Br1 H11 3.1426 no . 2_557
Br1 H14 3.5414 no . .
As1 H2 3.1247 no . .
As1 H11 3.1281 no . .
As1 H14 2.9376 no . .
As1 H18 2.9616 no . .
C1 H3 3.2372 no . .
C1 H5 3.2534 no . .
C1 H18 2.9188 no . .
C2 H4 3.2093 no . .
C2 H18 3.4904 no . .
C3 H5 3.2314 no . .
C4 H2 3.2095 no . .
C5 H3 3.2387 no . .
C5 H8 2.8831 no . .
C6 H2 3.2576 no . .
C6 H4 3.2259 no . .
C6 H8 2.7596 no . .
C6 H18 3.3131 no . .
C7 H5 2.7647 no . .
C7 H9 3.2365 no . .
C7 H11 3.2706 no . .
C7 H18 3.4987 no . .
C8 H5 2.8871 no . .
C8 H10 3.2045 no . .
C9 H11 3.2605 no . .
C10 H8 3.2105 no . .
C11 H9 3.2549 no . .
C12 H8 3.2508 no . .
C12 H10 3.2177 no . .
C12 H18 3.2872 no . .
C13 H15 3.2246 no . .
C13 H17 3.2341 no . .
C14 H16 3.2412 no . .
C14 H18 3.2329 no . .
C15 H17 3.1916 no . .
C16 H14 3.2334 no . .
C16 H18 3.2473 no . .
C17 H15 3.1947 no . .
C18 H14 3.2353 no . .
C18 H16 3.2483 no . .
H2 H3 2.3380 no . .
H3 H4 2.2865 no . .
H4 H5 2.2870 no . .
H5 H8 2.3838 no . .
H8 H9 2.2816 no . .
H9 H10 2.2920 no . .
H10 H11 2.3393 no . .
H14 H15 2.3236 no . .
H15 H16 2.2789 no . .
H16 H17 2.3101 no . .
H17 H18 2.3145 no . .
Br1 H5 3.3822 no . 1_545
Br1 H8 3.0228 no . 1_545
Br1 H16 3.4370 no . 1_455
Cl1 H4 3.0718 no . 2_566
Cl1 H8 3.1288 no . .
Cl1 H10 3.2690 no . 2_667
Cl1 H11 3.0743 no . 2_667
Cl1 H15 3.2187 no . 1_565
Cl1 H18 3.2905 no . .
Cl2 H4 3.0160 no . 2_566
Cl2 H5 3.2422 no . 2_566
Cl2 H18 2.7184 no . .
C2 H2 3.2323 no . 2_556
C2 H16 3.0189 no . 1_455
C3 H2 3.3118 no . 2_556
C3 H16 3.3679 no . 1_455
C3 H17 3.1236 no . 1_455
C4 H17 3.3640 no . 1_455
C6 H9 3.5922 no . 2_567
C9 H14 3.4702 no . 1_565
C12 H8 3.5151 no . 2_567
C13 H3 3.2352 no . 2_556
C14 H3 3.5150 no . 2_556
C14 H15 3.3131 no . 2_657
C15 H9 3.5305 no . 2_667
C15 H14 3.2521 no . 2_657
C16 H3 3.5873 no . 2_556
C16 H9 3.3136 no . 2_667
C16 H17 3.5783 no . 2_656
C17 H3 3.3165 no . 2_556
C17 H9 3.4551 no . 2_667
C17 H10 3.0482 no . 2_667
C17 H17 3.5943 no . 2_656
C18 H3 3.1356 no . 2_556
C18 H10 2.9880 no . 2_667
C19 H4 2.8985 no . 2_566
C19 H10 3.3376 no . 2_667
C19 H11 3.4349 no . 2_667
C19 H18 3.0289 no . .
C20 H4 3.3747 no . 2_566
C20 H18 3.4320 no . .
C21 H4 3.5731 no . 2_566
C21 H10 3.4562 no . 2_667
C21 H11 2.9608 no . 2_667
C21 H15 3.2421 no . 1_565
C21 H16 3.5587 no . 1_565
C22 H4 2.8765 no . 2_566
C22 H18 2.8083 no . .
C23 H4 3.1395 no . 2_566
C23 H10 3.4857 no . 2_667
C23 H11 3.4905 no . 2_667
C23 H18 3.5243 no . .
H2 C2 3.2323 no . 2_556
H2 C3 3.3118 no . 2_556
H2 H2 2.9379 no . 2_556
H2 H3 3.0707 no . 2_556
H2 H16 2.8091 no . 1_455
H3 C13 3.2352 no . 2_556
H3 C14 3.5150 no . 2_556
H3 C16 3.5873 no . 2_556
H3 C17 3.3165 no . 2_556
H3 C18 3.1356 no . 2_556
H3 H2 3.0707 no . 2_556
H3 H16 3.4370 no . 1_455
H3 H17 3.1217 no . 1_455
H3 H18 3.4722 no . 2_556
H4 Cl1 3.0718 no . 2_566
H4 Cl2 3.0160 no . 2_566
H4 C19 2.8985 no . 2_566
H4 C20 3.3747 no . 2_566
H4 C21 3.5731 no . 2_566
H4 C22 2.8765 no . 2_566
H4 C23 3.1395 no . 2_566
H4 H5 3.2134 no . 2_566
H4 H17 3.4948 no . 1_455
H5 Br1 3.3822 no . 1_565
H5 Cl2 3.2422 no . 2_566
H5 H4 3.2134 no . 2_566
H8 Br1 3.0228 no . 1_565
H8 Cl1 3.1288 no . .
H8 C12 3.5151 no . 2_567
H8 H14 3.2834 no . 1_565
H9 C6 3.5922 no . 2_567
H9 C15 3.5305 no . 2_667
H9 C16 3.3136 no . 2_667
H9 C17 3.4551 no . 2_667
H9 H14 2.7760 no . 1_565
H9 H16 3.5648 no . 2_667
H10 Cl1 3.2690 no . 2_667
H10 C17 3.0482 no . 2_667
H10 C18 2.9880 no . 2_667
H10 C19 3.3376 no . 2_667
H10 C21 3.4562 no . 2_667
H10 C23 3.4857 no . 2_667
H10 H17 3.0730 no . 2_667
H10 H18 2.9785 no . 2_667
H11 Cl1 3.0743 no . 2_667
H11 C19 3.4349 no . 2_667
H11 C21 2.9608 no . 2_667
H11 C23 3.4905 no . 2_667
H11 H15 3.0006 no . 2_657
H14 C9 3.4702 no . 1_545
H14 C15 3.2521 no . 2_657
H14 H8 3.2834 no . 1_545
H14 H9 2.7760 no . 1_545
H14 H15 2.9704 no . 2_657
H15 Cl1 3.2187 no . 1_545
H15 C14 3.3131 no . 2_657
H15 C21 3.2421 no . 1_545
H15 H11 3.0006 no . 2_657
H15 H14 2.9704 no . 2_657
H16 Br1 3.4370 no . 1_655
H16 C2 3.0189 no . 1_655
H16 C3 3.3679 no . 1_655
H16 C21 3.5587 no . 1_545
H16 H2 2.8091 no . 1_655
H16 H3 3.4370 no . 1_655
H16 H9 3.5648 no . 2_667
H16 H17 3.3838 no . 2_656
H17 C3 3.1236 no . 1_655
H17 C4 3.3640 no . 1_655
H17 C16 3.5783 no . 2_656
H17 C17 3.5943 no . 2_656
H17 H3 3.1217 no . 1_655
H17 H4 3.4948 no . 1_655
H17 H10 3.0730 no . 2_667
H17 H16 3.3838 no . 2_656
H17 H17 3.4137 no . 2_656
H18 Cl1 3.2905 no . .
H18 Cl2 2.7184 no . .
H18 C19 3.0289 no . .
H18 C20 3.4320 no . .
H18 C22 2.8083 no . .
H18 C23 3.5243 no . .
H18 H3 3.4722 no . 2_556
H18 H10 2.9785 no . 2_667


loop_
 _refln_index_h
 _refln_index_k
 _refln_index_l
 _refln_F_squared_calc
 _refln_F_squared_meas
 _refln_F_squared_sigma
 _refln_observed_status
   2   0   0      13715.31      11646.51       384.29 o
   3   0   0       1928.13       1793.71        46.96 o
   4   0   0         77.46         95.40         7.06 o
   5   0   0         91.34         83.67         7.91 o
   6   0   0        775.83        767.07        35.42 o
   7   0   0       1034.04       1015.94        51.36 o
   8   0   0       1435.77       1535.74        78.32 o
   9   0   0        626.91        768.92        49.61 o
  10   0   0        210.37        302.97        34.87 o
  11   0   0         43.13         28.64        26.92 o
 -11   1   0        203.48        345.46        51.04 o
 -10   1   0        433.53        516.56        52.68 o
  -9   1   0        670.99        749.01        71.39 o
  -8   1   0        645.49        644.55        42.09 o
  -7   1   0        272.01        238.14        22.62 o
  -6   1   0        179.22        187.52        30.67 o
  -5   1   0         75.01         57.22         8.65 o
  -4   1   0       4268.08       3852.37       162.58 o
  -3   1   0       9216.06       7799.19       381.80 o
  -2   1   0      29243.04      25313.68      1040.12 o
   1   1   0       1250.64       1595.93        30.21 o
   2   1   0       2624.04       2408.98        61.38 o
   3   1   0        510.07        466.24        15.69 o
   4   1   0          7.08         20.12         4.97 o
   5   1   0        154.48        160.79        13.67 o
   6   1   0       1614.23       1547.15        54.30 o
   7   1   0       1568.74       1664.01        75.09 o
   8   1   0        994.00       1162.39        56.70 o
   9   1   0        332.79        436.97        36.56 o
  10   1   0         50.87         52.35        41.63 o
  11   1   0          2.96          2.35         7.87 o
 -11   2   0        275.44        362.50        44.10 o
 -10   2   0        343.15        379.78        46.51 o
  -9   2   0        412.92        475.98        34.67 o
  -8   2   0        153.57        158.03        23.77 o
  -7   2   0         27.12         34.34         8.82 o
  -6   2   0        581.25        529.89        24.41 o
  -5   2   0       1657.16       1413.26       151.15 o
  -4   2   0      10667.26       9590.37       362.71 o
  -3   2   0      19587.13      19238.56       747.66 o
  -2   2   0      17338.31      17342.62       509.50 o
  -1   2   0       1903.04       2029.44        50.33 o
   0   2   0       4870.19       6983.23       256.12 o
   1   2   0       6159.72       7353.99       201.54 o
   2   2   0        289.36        217.36         7.28 o
   3   2   0         47.63         57.61         7.13 o
   4   2   0        681.37        721.60        28.04 o
   5   2   0       3717.11       3175.40       152.93 o
   6   2   0       3801.71       3721.81       272.96 o
   7   2   0       1710.69       1866.75        93.85 o
   8   2   0        421.42        496.13        34.22 o
   9   2   0         43.89         62.28        16.85 o
  10   2   0         26.21         24.08        23.69 o
  11   2   0         35.34         -0.03        12.82 o
 -11   3   0        333.37        411.52        47.76 o
 -10   3   0        268.41        311.37        32.99 o
  -9   3   0        104.73        146.31        21.25 o
  -8   3   0         97.10        118.83        18.83 o
  -7   3   0        348.22        348.64        21.94 o
  -6   3   0       1262.74       1234.26        58.63 o
  -5   3   0       6331.56       5692.53       272.75 o
  -4   3   0      12220.26      11879.12       417.09 o
  -3   3   0       4791.00       4571.44       137.88 o
  -2   3   0        841.20        911.90        14.02 o
  -1   3   0         49.96         52.23         1.86 o
   0   3   0        885.10        889.87        24.21 o
   1   3   0        906.31        885.69        18.65 o
   2   3   0        258.02        274.47         8.75 o
   3   3   0       4250.32       4518.14       128.05 o
   4   3   0       9279.49       8826.74       459.54 o
   5   3   0       6576.86       6525.45       377.12 o
   6   3   0       3135.20       3043.52       208.82 o
   7   3   0        724.85        802.76        84.66 o
   8   3   0         35.59         57.52        13.59 o
   9   3   0         67.56         38.47        48.18 o
  10   3   0         63.64         80.16        35.89 o
 -11   4   0        129.76         70.56        83.51 o
 -10   4   0         33.19         18.63        17.89 o
  -9   4   0        114.84        154.97        24.15 o
  -8   4   0        452.57        518.94        70.70 o
  -7   4   0       1659.31       1681.98       160.30 o
  -6   4   0       4139.84       4167.84       147.60 o
  -5   4   0       4718.86       4510.81       117.61 o
  -4   4   0       2249.92       2135.18        46.78 o
  -3   4   0        290.65        341.13         8.01 o
  -2   4   0         53.91         42.73         3.02 o
  -1   4   0       1353.77       1241.49        25.76 o
   0   4   0       1401.90       1651.87        49.69 o
   1   4   0       1205.25       1207.59        29.26 o
   2   4   0       9443.39      10253.01       338.94 o
   3   4   0      12303.14      12495.65       493.92 o
   4   4   0       6787.84       7188.36       302.63 o
   5   4   0       3240.64       3252.96       345.30 o
   6   4   0        442.29        457.10        33.00 o
   7   4   0         32.45         40.91        14.05 o
   8   4   0         36.73         37.66        14.76 o
   9   4   0        152.92        170.32        28.80 o
  10   4   0        129.96        141.97        28.19 o
 -11   5   0         22.38          0.00         4.14 o
 -10   5   0         28.72         24.70        17.42 o
  -9   5   0        140.82        163.21        17.48 o
  -8   5   0        901.99        933.60        40.81 o
  -7   5   0       1342.69       1291.23        38.46 o
  -6   5   0       1575.19       1533.25        42.63 o
  -5   5   0       1872.74       1666.18        41.10 o
  -4   5   0        125.70        132.14         9.37 o
  -3   5   0         43.37         25.72         3.60 o
  -2   5   0        115.50        133.07         4.20 o
  -1   5   0        540.06        585.86        15.87 o
   0   5   0       9525.86      11327.24       537.66 o
   1   5   0      13747.76      15401.86       805.44 o
   2   5   0      10104.42       9962.12       431.07 o
   3   5   0       8069.80       8396.80       487.70 o
   4   5   0       1527.73       1428.76       140.03 o
   5   5   0        259.29        273.29        24.96 o
   6   5   0         83.48         95.13        12.42 o
   7   5   0        100.22         94.82        16.57 o
   8   5   0        113.58        144.39        44.44 o
   9   5   0        255.44        302.93        51.57 o
 -11   6   0         30.36         22.39        19.35 o
 -10   6   0         65.91         44.31        24.69 o
  -9   6   0        490.75        492.98        29.89 o
  -8   6   0       1128.26       1134.44        55.63 o
  -7   6   0       1104.74       1055.02        40.17 o
  -6   6   0       1003.04       1007.66        30.70 o
  -5   6   0        408.73        406.84        13.30 o
  -4   6   0         14.81         18.14         3.46 o
  -3   6   0        249.68        229.81         6.63 o
  -2   6   0       2402.32       2462.80        49.35 o
  -1   6   0       8060.40       8261.05       259.63 o
   0   6   0      10666.68      11633.75       414.34 o
   1   6   0       9831.84      10441.59       509.82 o
   2   6   0       4822.02       4676.73       241.18 o
   3   6   0        573.86        571.09        24.77 o
   4   6   0          6.50         13.88         6.57 o
   5   6   0          4.32          7.74         5.70 o
   6   6   0          2.31          4.01         7.48 o
   7   6   0         73.61         65.12        12.56 o
   8   6   0        304.57        321.00        83.79 o
   9   6   0        275.22        390.76        74.04 o
 -10   7   0        132.38        124.28        14.64 o
  -9   7   0        445.25        491.63        33.24 o
  -8   7   0        702.67        696.77        27.56 o
  -7   7   0        333.32        337.11        24.13 o
  -6   7   0        370.90        393.07        16.26 o
  -5   7   0         90.49        110.49         9.61 o
  -4   7   0         90.57        116.51         7.01 o
  -3   7   0       2356.65       2291.53        51.61 o
  -2   7   0       7200.54       6927.76       214.82 o
  -1   7   0       5967.44       6087.48       150.81 o
   0   7   0       6733.63       6939.53       228.38 o
   1   7   0       1866.88       2104.64        86.96 o
   2   7   0         45.47         54.45         9.35 o
   3   7   0         45.25         41.05         8.09 o
   4   7   0        245.74        219.34        30.60 o
   5   7   0          3.34          2.02         5.18 o
   6   7   0        158.93        166.18        20.55 o
   7   7   0        417.13        427.37        44.18 o
   8   7   0        351.99        427.64        96.55 o
 -10   8   0        203.77        198.43        25.63 o
  -9   8   0        309.19        300.87        19.33 o
  -8   8   0         91.38        111.82        11.69 o
  -7   8   0          9.03         15.74         4.82 o
  -6   8   0         41.27         52.23         6.20 o
  -5   8   0        508.42        504.21        17.52 o
  -4   8   0       2295.26       2114.87        50.47 o
  -3   8   0       3910.99       3796.14       118.71 o
  -2   8   0       3692.54       3668.09       140.17 o
  -1   8   0       2187.40       2253.93        61.22 o
   0   8   0        417.37        502.80        16.35 o
   1   8   0         12.37         19.49         4.93 o
   2   8   0         30.82         36.03         8.42 o
   3   8   0         34.19         35.33        10.37 o
   4   8   0        200.60        175.26        13.56 o
   5   8   0        621.26        617.68        75.64 o
   6   8   0        650.40        648.58        74.66 o
   7   8   0        461.21        423.95        96.65 o
  -9   9   0        175.12        196.20        15.89 o
  -8   9   0         76.11          0.70         4.61 o
  -7   9   0        146.08        156.53        11.93 o
  -6   9   0        587.94        593.62        30.29 o
  -5   9   0        865.76        892.55        27.92 o
  -4   9   0       1484.31       1406.48        49.46 o
  -3   9   0       2165.67       1919.29        87.23 o
  -2   9   0       1197.70       1195.54        38.96 o
  -1   9   0         92.43         96.43         8.53 o
   0   9   0          4.16          4.17         4.37 o
   1   9   0         26.26         16.76         5.35 o
   2   9   0          4.59          9.09         5.92 o
   3   9   0        346.64        387.64        49.03 o
   4   9   0       1036.51       1199.08        74.99 o
   5   9   0       1001.54        891.41        95.40 o
   6   9   0        470.91        478.07        63.59 o
  -8  10   0         24.68         15.54        11.15 o
  -7  10   0        188.20        174.69        14.70 o
  -6  10   0        389.75        370.57        30.18 o
  -5  10   0        802.78        748.15        34.23 o
  -4  10   0        851.46        799.53        44.71 o
  -3  10   0        347.93        359.82        21.40 o
  -2  10   0         58.81         42.68         6.67 o
  -1  10   0         14.00         12.87         4.01 o
   0  10   0          4.46          2.96         3.38 o
   1  10   0        161.86        155.48        10.04 o
   2  10   0        773.55        861.06        42.65 o
   3  10   0       1209.85       1377.35        58.65 o
   4  10   0       1069.58       1222.41       113.32 o
   5  10   0        377.52        409.24        62.55 o
  -7  11   0        278.16        248.63        23.56 o
  -6  11   0        391.24        329.67        18.94 o
  -5  11   0        411.38        423.60        51.35 o
  -4  11   0        192.30        191.29        19.77 o
  -3  11   0         24.22         18.20         4.60 o
  -2  11   0          4.06          7.68         3.61 o
  -1  11   0         26.32         29.34         4.99 o
   0  11   0        427.71        445.17        22.20 o
   1  11   0        855.18        921.32        33.72 o
   2  11   0       1048.12       1073.67        50.11 o
   3  11   0        811.52        979.33        66.41 o
  -5  12   0        110.82        109.66        30.95 o
  -4  12   0         13.98         19.17         7.87 o
  -3  12   0         28.09         29.72         8.41 o
  -2  12   0        140.27        139.81        12.11 o
  -1  12   0        369.49        391.87        17.65 o
   0  12   0        809.60        848.11        28.85 o
   1  12   0        791.58        854.99        33.70 o
  -2 -12   1        343.10        327.08        32.25 o
  -1 -12   1        622.94        670.83        29.75 o
   0 -12   1        706.11        682.02        34.66 o
   1 -12   1        448.60        444.66        22.48 o
   2 -12   1         98.67         94.90         9.49 o
   3 -12   1          2.98          1.39         3.05 o
   4 -12   1         17.62         12.07         8.06 o
   5 -12   1          6.63         -5.12        13.32 o
   6 -12   1        133.01        121.25        23.22 o
  -4 -11   1        142.34        165.43        48.96 o
  -3 -11   1        502.05        558.63        49.00 o
  -2 -11   1        677.65        708.26        41.31 o
  -1 -11   1        652.86        631.22        25.96 o
   0 -11   1        364.53        402.43        21.07 o
   1 -11   1         36.45         24.99         5.75 o
   2 -11   1         34.20         32.81         5.17 o
   3 -11   1          1.31          4.87         2.81 o
   4 -11   1        116.15        102.48        17.18 o
   5 -11   1        464.31        502.70        40.82 o
   6 -11   1        690.99        670.75        57.00 o
   7 -11   1        587.07        548.45        46.88 o
  -5 -10   1        155.33        157.43        28.06 o
  -4 -10   1        360.71        407.83        43.62 o
  -3 -10   1        902.88        922.97        60.26 o
  -2 -10   1        451.26        448.63        28.42 o
  -1 -10   1        116.40        135.81        11.20 o
   0 -10   1          7.65          6.16         5.55 o
   1 -10   1         41.43         28.41         5.04 o
   2 -10   1          5.86          7.81         4.15 o
   3 -10   1        378.38        333.40        14.52 o
   4 -10   1       1268.61       1248.02        66.98 o
   5 -10   1       1646.62       1569.04        88.12 o
   6 -10   1       1101.56       1023.73        45.33 o
   7 -10   1        419.82        432.59        19.21 o
   8 -10   1        109.91         -0.75         5.11 o
  -6  -9   1        144.46         51.39        56.03 o
  -5  -9   1        368.08        326.00        56.04 o
  -4  -9   1        637.13        680.19        80.00 o
  -3  -9   1        369.19        399.58        34.60 o
  -2  -9   1         55.98         58.84         8.82 o
  -1  -9   1         15.72         17.70         4.87 o
   0  -9   1         28.27         37.10         6.81 o
   1  -9   1        297.54        285.26        12.14 o
   2  -9   1       1372.69       1373.24        67.81 o
   3  -9   1       3084.12       2949.06       134.27 o
   4  -9   1       2679.36       2505.18       107.95 o
   5  -9   1       1715.25       1723.47        54.13 o
   6  -9   1       1004.31        988.75        40.35 o
   7  -9   1        182.37        173.92        14.32 o
   8  -9   1         19.55         12.41        10.35 o
   9  -9   1         10.72          9.27         7.02 o
  -7  -8   1        167.98        161.01        25.81 o
  -6  -8   1        428.25        311.30        34.15 o
  -5  -8   1        565.36        488.18        82.61 o
  -4  -8   1        453.16        473.10        55.25 o
  -3  -8   1        314.19        378.66        47.43 o
  -2  -8   1         66.75         87.98        14.11 o
  -1  -8   1        309.94        335.11        23.43 o
   0  -8   1       1303.41       1358.74        35.35 o
   1  -8   1       2996.54       3116.87        80.47 o
   2  -8   1       4805.88       4514.65       132.36 o
   3  -8   1       4590.75       4423.70       175.70 o
   4  -8   1       3893.84       3595.80        88.08 o
   5  -8   1        690.01        667.22        27.46 o
   6  -8   1         78.38        108.47         8.81 o
   7  -8   1          1.38          3.25         2.95 o
   8  -8   1         37.70         34.12         7.16 o
   9  -8   1        128.24         90.47        31.72 o
  10  -8   1        334.67        313.36        35.16 o
  -8  -7   1        155.52        162.66        31.84 o
  -7  -7   1        498.33        470.53        79.24 o
  -6  -7   1        572.74        529.89       114.06 o
  -5  -7   1        534.62        495.86        65.83 o
  -4  -7   1        533.17        541.86        67.95 o
  -3  -7   1        210.61        206.49        15.53 o
  -2  -7   1        642.71        705.34        52.50 o
  -1  -7   1       2079.22       2238.98        63.81 o
   0  -7   1       5684.35       6197.46       162.50 o
   1  -7   1       7510.63       7633.18       234.09 o
   2  -7   1       6407.63       6218.79       185.71 o
   3  -7   1       2751.00       2507.65        51.72 o
   4  -7   1         33.46         38.08         3.94 o
   5  -7   1        545.89        471.53        17.07 o
   6  -7   1         16.10         19.40         4.16 o
   7  -7   1         14.71         17.00         4.63 o
   8  -7   1        252.66        282.86        17.64 o
   9  -7   1        561.18        584.98        37.94 o
  10  -7   1        389.12        414.77        36.67 o
  -9  -6   1        103.32         97.28        34.83 o
  -8  -6   1        303.97        310.29        30.03 o
  -7  -6   1        283.15        277.44        50.38 o
  -6  -6   1        337.90        369.87        42.64 o
  -5  -6   1        580.83        629.15        76.38 o
  -4  -6   1        512.57        495.27        38.64 o
  -3  -6   1       1121.15       1075.92        56.85 o
  -2  -6   1       3763.57       3709.25       232.50 o
  -1  -6   1       5254.49       5285.17       248.34 o
   0  -6   1       6813.14       7581.92       236.07 o
   1  -6   1       2965.28       2973.87        78.10 o
   2  -6   1       1257.51       1200.82        21.95 o
   3  -6   1          5.69         12.75         3.69 o
   4  -6   1         31.24         43.15         3.84 o
   5  -6   1         99.15         88.56         6.39 o
   6  -6   1        584.68        583.35        19.69 o
   7  -6   1        656.29        645.32        26.27 o
   8  -6   1       1269.63       1324.98        54.28 o
   9  -6   1        781.67        792.69        47.67 o
  10  -6   1        341.30        347.39        23.47 o
  11  -6   1         52.58         23.80        16.33 o
  -9  -5   1        231.47        248.95        56.49 o
  -8  -5   1        655.60        655.71       111.92 o
  -7  -5   1        657.79        660.35        84.24 o
  -6  -5   1        515.62        539.10        77.54 o
  -5  -5   1        579.99        550.79        37.22 o
  -4  -5   1        955.67       1064.17        71.41 o
  -3  -5   1       3144.19       2965.02       188.68 o
  -2  -5   1       5415.21       5274.08       260.34 o
  -1  -5   1       7048.35       7828.26       348.32 o
   0  -5   1       6921.58       8111.94       250.81 o
   1  -5   1        143.59        150.66         5.93 o
   2  -5   1         29.50         16.89         2.29 o
   3  -5   1        315.81        290.76         7.93 o
   4  -5   1         35.87         49.31         7.20 o
   5  -5   1        994.08        974.91        24.04 o
   6  -5   1       4009.88       3805.78       114.70 o
   7  -5   1       1917.87       1958.57        74.01 o
   8  -5   1       2051.40       2089.50       136.89 o
   9  -5   1        591.21        628.01        65.29 o
  10  -5   1         81.62        101.95        27.40 o
  11  -5   1         10.25         19.33        38.90 o
 -10  -4   1        272.90        364.23        43.65 o
  -9  -4   1        618.56        708.40        77.54 o
  -8  -4   1        589.31        646.23       126.12 o
  -7  -4   1        233.07        254.96        35.69 o
  -6  -4   1        228.17        257.13        20.11 o
  -5  -4   1        845.93        938.03        42.51 o
  -4  -4   1       1685.15       1526.93        95.42 o
  -3  -4   1       4189.97       4344.55       149.99 o
  -2  -4   1       6858.52       7367.14       226.56 o
  -1  -4   1       1930.71       2208.12        53.16 o
   0  -4   1        153.32        224.95         6.39 o
   1  -4   1         41.89         33.31         2.23 o
   2  -4   1        269.41        274.44         7.29 o
   3  -4   1       1321.49       1346.14        24.97 o
   4  -4   1       3955.62       3588.96        84.64 o
   5  -4   1       5948.43       5468.14       172.95 o
   6  -4   1       7300.17       6898.28       315.58 o
   7  -4   1       2351.53       2278.36        83.13 o
   8  -4   1        846.26        925.70       106.95 o
   9  -4   1         57.78         73.06        18.60 o
  10  -4   1          1.99          3.91         8.04 o
  11  -4   1          1.69          0.77         7.56 o
 -10  -3   1        287.22        377.00        48.90 o
  -9  -3   1        340.30        413.00        50.69 o
  -8  -3   1        161.73        177.10        50.47 o
  -7  -3   1         60.59         78.04        21.83 o
  -6  -3   1        439.85        517.69        58.80 o
  -5  -3   1       1675.92       1652.96       131.35 o
  -4  -3   1       1550.89       1581.59       116.26 o
  -3  -3   1       3191.71       3370.15       172.26 o
  -2  -3   1        239.45        286.57        11.53 o
  -1  -3   1         93.65        112.21         5.08 o
   0  -3   1        381.27        524.11        17.69 o
   1  -3   1         99.57        116.97         2.43 o
   2  -3   1       7328.91       7997.56       187.51 o
   3  -3   1       8254.20       7992.14       242.21 o
   4  -3   1      16689.37      15766.54       598.07 o
   5  -3   1      12899.37      12549.94       467.37 o
   6  -3   1       4804.33       4502.51       258.95 o
   7  -3   1        612.25        654.66        71.27 o
   8  -3   1         93.79         73.88        15.33 o
   9  -3   1         10.15          0.19        10.71 o
  10  -3   1         17.47          1.25         8.57 o
  11  -3   1        142.63        152.80        29.65 o
 -11  -2   1        148.25        228.19        45.44 o
 -10  -2   1        100.48        111.43        81.90 o
  -9  -2   1         64.62        112.38        20.42 o
  -8  -2   1         38.57         58.62        13.65 o
  -7  -2   1        559.24        636.69        66.34 o
  -6  -2   1       1286.72       1174.37        59.13 o
  -5  -2   1       2384.51       2342.81       193.94 o
  -4  -2   1       2320.31       2268.82        63.20 o
  -3  -2   1       1516.76       1499.77        62.65 o
  -2  -2   1        756.53        885.22        23.58 o
  -1  -2   1       1862.84       2250.73        51.95 o
   0  -2   1       3222.61       3262.52       101.59 o
   1  -2   1      27533.64      27334.80       919.30 o
   2  -2   1      15181.83      13674.29       461.51 o
   3  -2   1      16533.66      16232.58       606.50 o
   4  -2   1       9911.23       9548.35       342.40 o
   5  -2   1       1927.85       1600.47        73.80 o
   6  -2   1        248.79        288.74        35.29 o
   7  -2   1         27.61         26.99        13.46 o
   8  -2   1          4.28          7.50         8.74 o
   9  -2   1        108.42        133.17        20.83 o
  10  -2   1        168.69        225.12        35.83 o
  11  -2   1        182.50        229.65        42.77 o
 -11  -1   1         17.53         12.48        13.57 o
 -10  -1   1          2.08         12.13        11.99 o
  -9  -1   1         26.47         41.09        17.11 o
  -8  -1   1        132.71        141.38        18.57 o
  -7  -1   1        536.56        518.77        35.19 o
  -6  -1   1       1918.00       1843.79       158.63 o
  -5  -1   1       4007.80       3770.19       115.81 o
  -4  -1   1       1056.01        892.53        40.81 o
  -3  -1   1       1835.38       1895.52        46.40 o
  -2  -1   1       2042.92       1949.21        64.53 o
  -1  -1   1        288.88        222.32         9.93 o
   1  -1   1      13369.83      12495.87       388.91 o
   2  -1   1      24564.50      22940.42       921.09 o
   3  -1   1       7978.24       7419.94       231.74 o
   4  -1   1       2260.20       1904.50       125.68 o
   5  -1   1          5.25         18.68        15.57 o
   6  -1   1        480.45        442.65        35.74 o
   7  -1   1         10.24          5.62         5.49 o
   8  -1   1        221.35        286.04        28.18 o
   9  -1   1        482.89        579.32        63.59 o
  10  -1   1        529.80        662.28        51.50 o
  11  -1   1        354.77        498.56        51.14 o
 -11   0   1          3.38         -5.59        13.87 o
 -10   0   1         33.50         24.02        24.00 o
  -9   0   1         95.62        116.94        20.37 o
  -8   0   1        668.13        737.34        40.89 o
  -7   0   1       2268.90       2279.17        94.20 o
  -6   0   1       2988.74       2767.27        90.63 o
  -5   0   1       4138.13       3602.86       116.38 o
  -4   0   1       3014.28       2702.29       129.85 o
  -3   0   1       4384.80       3269.13        87.47 o
  -2   0   1       3043.21       2665.50        60.39 o
   1   0   1      21273.03      20263.58       742.90 o
   2   0   1        215.42        175.21         8.86 o
   3   0   1        589.16        584.85        17.22 o
   4   0   1         10.69         10.74         3.29 o
   5   0   1        891.12        768.11        26.47 o
   6   0   1        203.84        220.98        19.03 o
   7   0   1        822.76        904.83        39.83 o
   8   0   1       1239.14       1382.23        61.85 o
   9   0   1       1411.24       1693.18        96.49 o
  10   0   1        608.62        763.73        56.91 o
  11   0   1        220.65        292.63        39.05 o
 -11   1   1         26.77         16.57        19.29 o
 -10   1   1        247.90        285.08        33.58 o
  -9   1   1        847.40        955.18        81.73 o
  -8   1   1       2112.25       2101.00        95.70 o
  -7   1   1       2176.80       2102.81        77.81 o
  -6   1   1       2266.72       2035.38        65.54 o
  -5   1   1       1829.24       1618.77        76.90 o
  -4   1   1       1506.81       1170.13        65.63 o
  -3   1   1      13912.19      12072.71       407.27 o
  -2   1   1      31110.44      25472.24      1053.71 o
  -1   1   1      11494.74      12702.90       649.05 o
   0   1   1      15506.51      16745.39       459.64 o
   1   1   1       2076.46       1803.59       106.27 o
   2   1   1        202.08        149.11        17.64 o
   3   1   1        233.44        206.69        11.88 o
   4   1   1         66.17        101.34         8.55 o
   5   1   1        973.86        910.82        30.41 o
   6   1   1       2310.71       2404.21        79.88 o
   7   1   1       2886.43       3017.44       123.63 o
   8   1   1       2182.35       2477.98       117.31 o
   9   1   1        773.39        941.39        67.63 o
  10   1   1        156.77        201.41        28.69 o
  11   1   1         15.81         11.24        13.37 o
 -11   2   1        151.59        113.18        92.59 o
 -10   2   1        745.13        873.08        70.65 o
  -9   2   1       1099.46       1166.85        61.81 o
  -8   2   1       1951.27       1995.81        80.14 o
  -7   2   1       1357.47       1376.07        92.39 o
  -6   2   1       1081.93       1093.47        89.02 o
  -5   2   1        918.17        832.03        35.52 o
  -4   2   1        897.49        851.32        65.02 o
  -3   2   1       4408.13       4146.67       220.93 o
  -2   2   1       3124.09       3433.65       111.78 o
  -1   2   1       3018.29       2780.24        40.37 o
   0   2   1       4434.41       6020.44       440.98 o
   1   2   1        194.76        184.85         6.50 o
   2   2   1        147.83        173.33         5.99 o
   3   2   1        335.38        347.87        13.10 o
   4   2   1       1307.10       1028.19        70.82 o
   5   2   1       2424.36       2313.49       128.19 o
   6   2   1       5262.51       5034.87       190.28 o
   7   2   1       2806.47       3008.73       144.15 o
   8   2   1        911.24       1055.58        62.25 o
   9   2   1        102.72        120.49        24.48 o
  10   2   1          3.34          4.84         9.86 o
 -11   3   1        405.31        532.19        64.75 o
 -10   3   1        618.36        758.61        54.42 o
  -9   3   1        513.02        599.90        50.77 o
  -8   3   1        235.63        277.07        27.21 o
  -7   3   1         58.08         63.29        14.18 o
  -6   3   1        107.62        158.09        51.80 o
  -5   3   1        655.68        625.77        49.57 o
  -4   3   1       2841.82       2824.45        65.66 o
  -3   3   1       4968.48       4942.53       109.45 o
  -2   3   1       2149.45       2149.53        35.64 o
  -1   3   1       2188.56       2430.18        37.74 o
   0   3   1       1940.29       2054.19        99.00 o
   1   3   1        639.01        559.82        12.31 o
   2   3   1       1827.62       1772.56        40.45 o
   3   3   1       4582.74       4190.17       122.94 o
   4   3   1       7412.55       7052.79       240.27 o
   5   3   1       5216.23       4633.46       408.05 o
   6   3   1       3189.96       3121.97       383.88 o
   7   3   1        651.52        658.77        60.31 o
   8   3   1         31.05         30.48        12.56 o
   9   3   1          3.85          0.00         4.56 o
  10   3   1          5.11          5.28         9.19 o
 -11   4   1        322.81        418.96        46.95 o
 -10   4   1        223.97        305.11        32.96 o
  -9   4   1         28.58         44.91        15.79 o
  -8   4   1         24.72         14.58        12.91 o
  -7   4   1         78.16         84.44         8.60 o
  -6   4   1        299.02        301.71        15.91 o
  -5   4   1       1271.38       1219.48        37.85 o
  -4   4   1       1758.66       1665.03        36.62 o
  -3   4   1       2839.15       2753.58        48.83 o
  -2   4   1       2197.95       2189.01        42.04 o
  -1   4   1       1127.00       1124.82        20.55 o
   0   4   1       1497.95       1387.50        64.40 o
   1   4   1       2483.65       2284.04        50.44 o
   2   4   1       8224.21       8696.54       272.72 o
   3   4   1       8242.05       8072.35       391.73 o
   4   4   1       6065.21       5908.92       343.81 o
   5   4   1       2475.03       2456.16       146.31 o
   6   4   1        303.47        299.92        30.95 o
   7   4   1          8.43         18.62         7.80 o
   8   4   1          7.93          6.43         6.79 o
   9   4   1          1.70          8.11        10.77 o
  10   4   1         40.13         60.08        21.73 o
 -11   5   1         71.19         -0.41         4.82 o
 -10   5   1         12.93          2.01         4.74 o
  -9   5   1          6.88         14.49         7.01 o
  -8   5   1         24.29         34.03         8.79 o
  -7   5   1        530.43        523.56        27.36 o
  -6   5   1        807.58        803.02        23.38 o
  -5   5   1       3289.98       3257.50        85.61 o
  -4   5   1       2823.51       2759.07        66.20 o
  -3   5   1       1502.08       1418.69        28.13 o
  -2   5   1        311.83        285.29         6.46 o
  -1   5   1       2598.81       2360.82        58.26 o
   0   5   1       3118.91       3277.37        67.87 o
   1   5   1       7341.48       7638.64       340.81 o
   2   5   1       6708.33       6854.72       215.85 o
   3   5   1       4250.25       4274.42       147.82 o
   4   5   1       1294.03       1367.15        88.47 o
   5   5   1         11.69         16.98         5.60 o
   6   5   1          2.28          1.28         6.00 o
   7   5   1          0.55          4.06         6.30 o
   8   5   1          7.24         18.31        11.00 o
   9   5   1        121.96        172.87        25.08 o
 -11   6   1         15.53          5.30         6.35 o
 -10   6   1          2.15          2.91         5.06 o
  -9   6   1         32.48         33.88         8.40 o
  -8   6   1        359.73        356.78        23.56 o
  -7   6   1       1183.40       1178.85        36.19 o
  -6   6   1       1424.52       1425.69        41.84 o
  -5   6   1       3728.82       3620.89        98.72 o
  -4   6   1       1851.38       1771.15        41.22 o
  -3   6   1       1781.22       1680.36        32.96 o
  -2   6   1       2290.61       2309.62        47.73 o
  -1   6   1       2863.43       3043.86        78.67 o
   0   6   1       3042.38       3048.92        66.33 o
   1   6   1       4154.03       4677.49       241.21 o
   2   6   1       2379.25       2357.90       103.70 o
   3   6   1        738.91        737.77        35.09 o
   4   6   1         86.41         92.08         8.68 o
   5   6   1         63.70         63.34         9.12 o
   6   6   1         11.52         12.92         5.96 o
   7   6   1         51.39         71.05        20.84 o
   8   6   1        248.70        296.93        59.30 o
 -10   7   1         80.83         65.92        14.15 o
  -9   7   1        502.03        553.55        37.00 o
  -8   7   1       1243.36       1328.76        73.63 o
  -7   7   1       2332.28       2381.63        73.92 o
  -6   7   1       1346.88       1394.73        41.38 o
  -5   7   1       1587.75       1561.64        39.01 o
  -4   7   1        197.87        206.70         7.96 o
  -3   7   1        801.92        721.45        19.16 o
  -2   7   1       1368.20       1278.41        33.31 o
  -1   7   1       2342.25       2394.17        55.69 o
   0   7   1       1667.64       1770.77        42.55 o
   1   7   1       1241.66       1273.64        41.52 o
   2   7   1        117.50        157.05        20.74 o
   3   7   1          8.13          4.79         5.24 o
   4   7   1          4.02          9.39         5.48 o
   5   7   1         10.04         14.44         5.74 o
   6   7   1        326.86        302.93        28.45 o
   7   7   1        466.20        522.94       102.33 o
   8   7   1        407.77        452.70       113.12 o
 -10   8   1        177.54        203.62        18.74 o
  -9   8   1        659.17        702.93        48.38 o
  -8   8   1        819.11        885.58        38.21 o
  -7   8   1        466.63        485.82        22.22 o
  -6   8   1        116.67        120.55        11.32 o
  -5   8   1        419.40        431.93        16.27 o
  -4   8   1        145.85        130.49         7.39 o
  -3   8   1        599.96        530.24        16.57 o
  -2   8   1        954.40       1020.24        38.48 o
  -1   8   1       1061.45        987.85        24.21 o
   0   8   1        397.57        441.45        18.54 o
   1   8   1        142.53        166.34         8.07 o
   2   8   1         21.83         14.83         6.49 o
   3   8   1         19.32         20.28        13.53 o
   4   8   1         99.89         98.83         9.79 o
   5   8   1        535.09        545.05        41.56 o
   6   8   1        617.26        608.78        81.30 o
   7   8   1        476.09        500.21       109.89 o
  -9   9   1        278.74        301.91        22.14 o
  -8   9   1        149.60        174.32        29.50 o
  -7   9   1        113.43        122.97        12.08 o
  -6   9   1         62.26         45.31         7.29 o
  -5   9   1        153.35        117.58        16.41 o
  -4   9   1         80.04         77.16        10.29 o
  -3   9   1        686.09        623.13        24.75 o
  -2   9   1        709.63        698.32        19.75 o
  -1   9   1        452.99        472.11        15.30 o
   0   9   1        359.27        357.28        18.04 o
   1   9   1        223.43        212.53        11.47 o
   2   9   1        136.82        161.53        12.69 o
   3   9   1        340.17        341.40        32.13 o
   4   9   1        684.98        782.51        51.09 o
   5   9   1        783.37        772.51       131.11 o
   6   9   1        415.49        428.82        86.10 o
  -8  10   1         11.89          9.33         7.45 o
  -7  10   1          9.34          1.56         3.94 o
  -6  10   1         43.51         26.50         8.73 o
  -5  10   1        259.04        278.35        19.38 o
  -4  10   1        530.63        503.78        30.98 o
  -3  10   1        932.69        914.87        42.81 o
  -2  10   1        783.18        838.86        25.31 o
  -1  10   1        419.54        407.91        15.48 o
   0  10   1        171.84        191.76        15.19 o
   1  10   1        249.57        288.92        12.84 o
   2  10   1        530.75        585.87        31.69 o
   3  10   1        588.50        676.41        34.20 o
   4  10   1        585.10        544.43        57.32 o
  -7  11   1         35.34         28.26        16.63 o
  -6  11   1        159.18        156.42        20.10 o
  -5  11   1        470.80        471.03        33.64 o
  -4  11   1        603.90        651.70        31.49 o
  -3  11   1        528.80        532.57        30.64 o
  -2  11   1        282.86        289.49        15.07 o
  -1  11   1        184.11        205.55        11.43 o
   0  11   1        284.51        306.24        14.34 o
   1  11   1        406.25        457.20        26.87 o
   2  11   1        472.68        529.63        24.11 o
   3  11   1        371.48        360.75        32.07 o
  -5  12   1        371.60        419.38        27.18 o
  -4  12   1        282.35        305.98        15.52 o
  -3  12   1        184.45        191.34        13.64 o
  -2  12   1        144.44        151.08        10.57 o
  -1  12   1        135.22        134.30        12.03 o
   0  12   1        283.26        304.05        18.00 o
  -2 -12   2         90.86         22.90        17.23 o
  -1 -12   2        145.04        135.07        41.11 o
   0 -12   2        252.05        258.61        16.63 o
   1 -12   2        452.21        397.64        23.91 o
   2 -12   2        324.63        294.16        35.32 o
   3 -12   2         97.40        110.88        14.38 o
   4 -12   2         14.81         12.68         9.07 o
   5 -12   2         14.96          1.14         6.60 o
   6 -12   2        114.33        135.05        26.86 o
  -4 -11   2         11.24          0.08         5.86 o
  -3 -11   2         36.01         -0.38         6.06 o
  -2 -11   2        177.04        182.31        16.91 o
  -1 -11   2        434.74        422.59        18.61 o
   0 -11   2        619.11        582.37        22.71 o
   1 -11   2        460.47        465.06        24.73 o
   2 -11   2        142.97        120.95        11.45 o
   3 -11   2         66.93         74.64        11.90 o
   4 -11   2        156.51        160.47        23.79 o
   5 -11   2        257.66        297.41        33.69 o
   6 -11   2        459.37        519.95        48.53 o
   7 -11   2        441.09        369.58        39.35 o
  -5 -10   2          1.96          2.19        15.42 o
  -4 -10   2          9.18         -0.94        11.52 o
  -3 -10   2        259.25        258.29        19.08 o
  -2 -10   2        886.70        911.48        36.55 o
  -1 -10   2        633.01        646.48        25.83 o
   0 -10   2        769.71        859.76        27.73 o
   1 -10   2        556.43        542.20        21.96 o
   2 -10   2        197.92        207.17        20.18 o
   3 -10   2        497.57        541.10        56.40 o
   4 -10   2        846.55        958.52        59.13 o
   5 -10   2       1069.60       1149.07        71.03 o
   6 -10   2       1108.04       1080.84        81.68 o
   7 -10   2        514.03        486.67        34.21 o
   8 -10   2        208.94        173.38        13.83 o
  -6  -9   2          1.01          0.13         4.89 o
  -5  -9   2         63.16         63.34        12.87 o
  -4  -9   2        377.11        370.62        39.15 o
  -3  -9   2       1029.31       1067.79        97.77 o
  -2  -9   2       1011.31       1116.98        40.76 o
  -1  -9   2       1074.88       1140.81        32.15 o
   0  -9   2        694.39        741.29        27.11 o
   1  -9   2        643.66        666.70        19.60 o
   2  -9   2       1108.40       1048.41        68.04 o
   3  -9   2       1243.65       1227.75        62.76 o
   4  -9   2       1266.98       1308.08        97.28 o
   5  -9   2        951.13        834.60        50.61 o
   6  -9   2        561.49        528.72        34.43 o
   7  -9   2        114.09        109.82        13.38 o
   8  -9   2         20.09         13.94         5.13 o
   9  -9   2          1.29         -1.35         3.38 o
  -7  -8   2          1.33          2.77         6.69 o
  -6  -8   2        152.11        150.75        30.50 o
  -5  -8   2        632.46        572.82        96.25 o
  -4  -8   2       1374.11       1349.08       178.61 o
  -3  -8   2       2581.71       2707.67       137.58 o
  -2  -8   2       2018.18       2198.79       139.06 o
  -1  -8   2       1094.00       1130.22        39.48 o
   0  -8   2       1195.96       1222.69        29.79 o
   1  -8   2       1000.67       1097.21        28.82 o
   2  -8   2        720.23        722.89        32.44 o
   3  -8   2       2553.86       2513.34       112.33 o
   4  -8   2       2993.26       2911.55       169.02 o
   5  -8   2       1468.32       1308.18        62.05 o
   6  -8   2        309.08        292.60        16.28 o
   7  -8   2         28.54         27.94         7.51 o
   8  -8   2         10.09         11.06         4.83 o
   9  -8   2         21.37         26.05         6.92 o
  10  -8   2        164.25        177.97        22.68 o
  -8  -7   2         42.19         53.47        20.97 o
  -7  -7   2        548.21        585.57        80.26 o
  -6  -7   2       1254.17       1234.95       176.57 o
  -5  -7   2       2024.17       2017.06       240.41 o
  -4  -7   2       2965.00       2877.32       303.53 o
  -3  -7   2       2022.20       1994.19       180.72 o
  -2  -7   2        896.87        901.53        47.67 o
  -1  -7   2        815.47        779.74        39.42 o
   0  -7   2        624.92        717.57        17.77 o
   1  -7   2       1799.62       1829.36        43.97 o
   2  -7   2       2867.82       2662.30        70.70 o
   3  -7   2       2236.04       2249.03       120.61 o
   4  -7   2        838.78        732.68        36.74 o
   5  -7   2        112.35        120.44         9.58 o
   6  -7   2         84.27         98.66         6.93 o
   7  -7   2        181.11        182.41        14.16 o
   8  -7   2        232.53        254.46        14.45 o
   9  -7   2        459.74        510.34        33.76 o
  10  -7   2        478.05        485.26        57.11 o
  -9  -6   2        106.49        100.79        28.76 o
  -8  -6   2        519.34        540.10        51.43 o
  -7  -6   2       1199.21       1152.88       169.64 o
  -6  -6   2       2261.20       2324.96       253.43 o
  -5  -6   2       2125.57       2147.17       208.65 o
  -4  -6   2       1293.50       1412.85        85.15 o
  -3  -6   2        456.11        400.31        22.57 o
  -2  -6   2        139.89        183.86        11.38 o
  -1  -6   2        326.76        328.96        20.48 o
   0  -6   2       1350.46       1466.18        39.33 o
   1  -6   2       2495.39       2871.99        73.58 o
   2  -6   2       1190.15       1175.93        59.98 o
   3  -6   2        796.67        736.74        26.95 o
   4  -6   2        191.76        200.23         7.39 o
   5  -6   2         19.74         22.67        10.45 o
   6  -6   2        238.71        265.62        13.99 o
   7  -6   2        708.13        763.01        25.16 o
   8  -6   2        823.21        826.34        30.56 o
   9  -6   2        771.64        822.69        56.59 o
  10  -6   2        438.44        393.41        30.78 o
  11  -6   2         99.46         58.29        37.77 o
  -9  -5   2        204.92        209.51        34.90 o
  -8  -5   2       1005.81        957.17       131.07 o
  -7  -5   2       1885.92       2013.01       201.67 o
  -6  -5   2       1187.03       1252.19        85.24 o
  -5  -5   2        496.65        526.25        36.35 o
  -4  -5   2        192.42        186.37        14.10 o
  -3  -5   2        413.54        370.25        20.29 o
  -2  -5   2         23.60         23.85         4.80 o
  -1  -5   2        657.64        675.15        29.44 o
   0  -5   2       2795.01       3397.93        84.28 o
   1  -5   2       4152.22       4604.85       190.53 o
   2  -5   2        808.07        669.88        20.70 o
   3  -5   2       2076.69       2202.20        45.14 o
   4  -5   2        962.69        890.37        19.34 o
   5  -5   2        736.64        722.37        20.21 o
   6  -5   2       2143.88       2114.44        81.07 o
   7  -5   2       2082.89       2043.82        77.48 o
   8  -5   2       1245.05       1316.77        91.41 o
   9  -5   2        923.99        918.75        99.27 o
  10  -5   2        222.48        273.96        48.42 o
  11  -5   2         12.37         14.41        22.25 o
 -10  -4   2        307.92        412.07        59.93 o
  -9  -4   2        691.16        745.16       123.53 o
  -8  -4   2       1283.81       1395.28       123.09 o
  -7  -4   2        398.81        420.94        36.83 o
  -6  -4   2        103.41        116.21        23.97 o
  -5  -4   2         48.73         36.03        13.33 o
  -4  -4   2          8.70          7.70         5.35 o
  -3  -4   2        702.19        748.91        35.42 o
  -2  -4   2       5200.95       5899.22       176.89 o
  -1  -4   2       5603.03       6242.60       266.40 o
   0  -4   2       6129.18       7700.96       330.27 o
   1  -4   2       2977.03       2796.02        67.68 o
   2  -4   2       4863.40       4955.10       212.04 o
   3  -4   2       1756.73       1565.34        32.70 o
   4  -4   2       1009.49        919.34        40.07 o
   5  -4   2       1896.66       1798.36        71.48 o
   6  -4   2       3249.01       3042.01       146.61 o
   7  -4   2       1890.79       1820.40       123.24 o
   8  -4   2        843.25        818.40        52.44 o
   9  -4   2        239.92        245.87        26.20 o
  10  -4   2          8.57         17.52        12.32 o
  11  -4   2          1.39         -7.11        13.69 o
 -10  -3   2        498.26        593.37        61.11 o
  -9  -3   2        285.89        397.40        59.26 o
  -8  -3   2        233.15        273.18        42.97 o
  -7  -3   2         67.43         65.23        16.08 o
  -6  -3   2        185.59        172.65        33.81 o
  -5  -3   2         48.88         63.44        10.89 o
  -4  -3   2       1705.73       1832.64        61.91 o
  -3  -3   2       3095.90       3187.46        88.53 o
  -2  -3   2      13282.22      16244.04       609.44 o
  -1  -3   2      10023.95      11207.71       650.07 o
   0  -3   2      11591.11      14136.74       699.14 o
   1  -3   2      10494.86      12253.53       381.01 o
   2  -3   2        726.79        492.03        14.56 o
   3  -3   2       6016.71       5872.83       166.59 o
   4  -3   2       4751.20       4579.32       136.64 o
   5  -3   2       3787.65       3514.70       218.44 o
   6  -3   2       3079.24       2923.16       174.02 o
   7  -3   2        537.04        551.70        44.19 o
   8  -3   2         58.55         65.26        21.94 o
   9  -3   2          3.57         11.33        11.04 o
  10  -3   2          2.40         14.79        19.40 o
  11  -3   2         49.18         68.29        26.69 o
 -11  -2   2        292.55        376.10        56.81 o
 -10  -2   2        164.89        248.66        44.46 o
  -9  -2   2         33.06         22.28        22.78 o
  -8  -2   2          1.50          5.88         7.55 o
  -7  -2   2         70.96         63.50        15.07 o
  -6  -2   2        341.76        307.36        29.48 o
  -5  -2   2       1893.16       1803.55       115.13 o
  -4  -2   2       8180.20       7904.30       261.31 o
  -3  -2   2      14516.04      16354.63       623.69 o
  -2  -2   2      14190.88      15848.59       588.21 o
  -1  -2   2      12002.62      14341.23       495.15 o
   1  -2   2        544.10        345.93        13.38 o
   2  -2   2       8618.32       9862.97       304.03 o
   3  -2   2       5401.77       5200.22       197.86 o
   4  -2   2       4384.99       4118.78       165.99 o
   5  -2   2       3877.21       3691.17       240.93 o
   6  -2   2        729.65        669.35        45.46 o
   7  -2   2         47.70         61.22        12.87 o
   8  -2   2         13.20         22.72         9.30 o
   9  -2   2         52.79         80.78        20.36 o
  10  -2   2        147.24        211.40        46.56 o
  11  -2   2        170.68        261.72        37.06 o
 -11  -1   2         82.27         83.72        66.77 o
 -10  -1   2         18.45         15.06        15.85 o
  -9  -1   2          4.60          3.67         7.87 o
  -8  -1   2         90.95        101.51        16.12 o
  -7  -1   2        309.31        286.19        26.38 o
  -6  -1   2       2696.24       2402.58       157.59 o
  -5  -1   2       8200.03       7605.00       418.98 o
  -4  -1   2       9547.28       8955.75       307.32 o
  -3  -1   2      15108.62      15377.56       566.78 o
  -2  -1   2      24191.39      29045.26      1300.06 o
  -1  -1   2       7552.56       9214.37       271.27 o
   0  -1   2        154.37        157.79         3.18 o
   1  -1   2       7910.96       9225.96       265.28 o
   2  -1   2        908.81        816.52        28.35 o
   3  -1   2       3041.60       3001.26        78.51 o
   4  -1   2       2236.23       2242.58        59.71 o
   5  -1   2       1041.50       1056.38        82.81 o
   6  -1   2        188.54        162.08        13.26 o
   7  -1   2         34.94         57.65        12.60 o
   8  -1   2        110.75        124.26        28.33 o
   9  -1   2        171.81        206.81        24.55 o
  10  -1   2        222.68        301.53        34.87 o
  11  -1   2        225.42        300.31        38.87 o
 -11   0   2          1.13          2.26         8.94 o
 -10   0   2          0.96         -0.88         8.22 o
  -9   0   2         63.00         71.87        16.32 o
  -8   0   2        499.54        521.84        40.78 o
  -7   0   2       3297.00       3399.97       123.49 o
  -6   0   2       6309.75       5773.09       215.97 o
  -5   0   2       7522.06       6546.50       254.85 o
  -4   0   2       4597.06       3939.70       111.13 o
  -3   0   2        137.27        187.52         9.61 o
  -2   0   2       8318.91       9660.63       296.65 o
  -1   0   2         42.25         33.52         1.70 o
   0   0   2        413.74        334.46         7.78 o
   1   0   2       7458.92       8659.41       242.28 o
   2   0   2       3070.46       3093.50        70.97 o
   3   0   2       3158.54       2811.36        69.25 o
   4   0   2        764.85        701.10        48.31 o
   5   0   2        433.14        328.66        23.10 o
   6   0   2        110.20        151.64        16.19 o
   7   0   2        688.34        713.19        40.17 o
   8   0   2        730.33        836.59        50.64 o
   9   0   2        775.45        943.83        62.99 o
  10   0   2        508.96        614.98        76.19 o
  11   0   2        156.88        118.69        79.33 o
 -11   1   2          2.15          7.87        11.81 o
 -10   1   2         82.53         79.07        65.06 o
  -9   1   2        553.79        674.15        69.98 o
  -8   1   2       2314.25       2628.59       118.26 o
  -7   1   2       3964.10       3740.61       133.93 o
  -6   1   2       4206.53       3853.85       136.13 o
  -5   1   2       3615.35       3279.13        96.80 o
  -4   1   2        220.39        245.37        10.48 o
  -3   1   2          7.99          9.99         2.47 o
  -2   1   2        379.43        447.60        27.41 o
  -1   1   2        234.76        213.92         7.12 o
   0   1   2        118.59         90.51         3.93 o
   1   1   2      17054.63      16183.46       847.57 o
   2   1   2       2641.91       2167.65        97.11 o
   3   1   2       4118.43       3445.85       115.53 o
   4   1   2       2437.58       2047.21        62.58 o
   5   1   2       1424.45       1500.61        67.69 o
   6   1   2        806.49        743.66        30.70 o
   7   1   2       1472.08       1676.87        87.46 o
   8   1   2       1331.65       1424.76        74.24 o
   9   1   2        820.79        881.02        53.15 o
  10   1   2        225.02        210.49       128.26 o
 -11   2   2         65.34         34.29        48.02 o
 -10   2   2        634.53        782.10        66.77 o
  -9   2   2       1457.17       1735.22        83.04 o
  -8   2   2       1973.57       2158.68       100.54 o
  -7   2   2       2394.93       2444.03        96.48 o
  -6   2   2        356.95        310.91        16.95 o
  -5   2   2         31.61         54.41         6.61 o
  -4   2   2        270.77        223.67         7.71 o
  -3   2   2        248.91        276.76        14.29 o
  -2   2   2       1080.74       1101.07        55.18 o
  -1   2   2       7225.56       8692.08       326.78 o
   0   2   2       4318.48       4471.15       157.68 o
   1   2   2      20958.76      20680.41      1090.18 o
   2   2   2       2415.14       2034.85        89.16 o
   3   2   2       5067.92       4298.75       121.64 o
   4   2   2       2030.86       1915.88        62.59 o
   5   2   2       1535.60       1361.70        48.91 o
   6   2   2       1982.13       2061.69        79.80 o
   7   2   2       1866.10       1886.59        73.65 o
   8   2   2        712.62        726.66        49.27 o
   9   2   2        190.99        182.77        21.15 o
  10   2   2         23.90          8.51         9.52 o
 -11   3   2        332.27        456.54        50.08 o
 -10   3   2        939.93       1173.12        71.00 o
  -9   3   2       1015.93       1143.82        71.34 o
  -8   3   2        918.05       1000.12        46.47 o
  -7   3   2         27.05         34.74         8.54 o
  -6   3   2         94.70         92.54         9.19 o
  -5   3   2          8.25         21.54         4.21 o
  -4   3   2         87.55         83.99         6.07 o
  -3   3   2       4832.39       4885.01       130.10 o
  -2   3   2       6540.69       6648.97       145.28 o
  -1   3   2      10903.08      11804.66       265.64 o
   0   3   2      13323.10      14717.51       402.39 o
   1   3   2       5865.83       6080.21       249.16 o
   2   3   2        492.17        445.71        14.81 o
   3   3   2       1677.06       1464.33        39.91 o
   4   3   2       1012.34        882.15        36.52 o
   5   3   2       1811.93       1711.00       116.16 o
   6   3   2       1303.68       1199.37        90.16 o
   7   3   2        764.85        770.02        37.21 o
   8   3   2        161.17        172.55        21.55 o
   9   3   2         24.03         43.13        13.28 o
  10   3   2          7.55          9.06        11.78 o
 -11   4   2        308.83        397.39        42.05 o
 -10   4   2        395.51        464.81        39.14 o
  -9   4   2         79.73         80.57        15.94 o
  -8   4   2          3.15          1.96         3.64 o
  -7   4   2          1.11          1.87         3.55 o
  -6   4   2         30.92         26.46         6.32 o
  -5   4   2       1142.38       1182.00        31.16 o
  -4   4   2       4432.17       4084.91        96.40 o
  -3   4   2      14332.38      15059.43       388.79 o
  -2   4   2      16863.79      18906.80       514.42 o
  -1   4   2      11233.98      11904.76       322.67 o
   0   4   2       1875.96       1934.96        34.06 o
   1   4   2       1862.06       1820.73        37.26 o
   2   4   2        190.14        161.02         8.76 o
   3   4   2       1013.64       1020.91        34.95 o
   4   4   2       1755.52       1631.65        71.65 o
   5   4   2       1078.05        987.39        75.69 o
   6   4   2        561.09        540.68        63.18 o
   7   4   2        107.52        116.59        21.23 o
   8   4   2         18.14         24.04        11.10 o
   9   4   2          3.60          7.23         9.28 o
 -11   5   2        146.59        161.67        27.11 o
 -10   5   2         72.59         68.41        25.47 o
  -9   5   2          2.39          3.92         5.83 o
  -8   5   2          9.12         15.09         5.73 o
  -7   5   2        106.83        125.53        11.01 o
  -6   5   2       1192.19       1209.48        36.66 o
  -5   5   2       3671.40       3615.76        91.45 o
  -4   5   2       8428.77       8098.58       219.65 o
  -3   5   2       8066.36       7981.03       184.12 o
  -2   5   2       2573.95       2312.38        39.99 o
  -1   5   2       1113.49       1153.98        42.02 o
   0   5   2        570.30        583.38        11.25 o
   1   5   2         15.79         29.03         6.96 o
   2   5   2        441.75        470.78        14.49 o
   3   5   2       1154.59       1192.46        63.06 o
   4   5   2        453.26        403.53        18.62 o
   5   5   2        277.82        256.11        35.21 o
   6   5   2        163.90        176.45        16.26 o
   7   5   2         79.28         95.78        19.31 o
   8   5   2         23.78         27.40        12.23 o
   9   5   2         37.04         62.30        16.64 o
 -11   6   2         17.16          9.05         9.75 o
 -10   6   2          2.69          2.73         4.84 o
  -9   6   2          2.62          3.43         5.45 o
  -8   6   2        164.03        199.78        16.07 o
  -7   6   2       1116.05       1165.16        39.81 o
  -6   6   2       2439.03       2430.26        68.28 o
  -5   6   2       4476.05       4387.96       116.41 o
  -4   6   2       3703.09       3591.93        75.36 o
  -3   6   2        982.95        913.43        18.25 o
  -2   6   2        176.00        176.53         6.83 o
  -1   6   2         29.87         37.84         4.17 o
   0   6   2          5.36         10.21         3.20 o
   1   6   2        531.54        543.05        17.84 o
   2   6   2        847.38        936.07        30.91 o
   3   6   2        737.30        626.96        22.32 o
   4   6   2        993.85        940.52        58.79 o
   5   6   2        338.66        354.14        33.68 o
   6   6   2        142.82        138.30        23.41 o
   7   6   2         66.48         72.31        15.46 o
   8   6   2        109.64        170.23        49.47 o
 -10   7   2         13.18         24.74         9.94 o
  -9   7   2        104.00        116.92        17.55 o
  -8   7   2        689.19        776.11        30.48 o
  -7   7   2       2215.81       2230.28        91.89 o
  -6   7   2       2426.42       2348.00        62.53 o
  -5   7   2       1334.18       1311.84        32.94 o
  -4   7   2        400.08        371.77        11.12 o
  -3   7   2         33.74         27.50         3.67 o
  -2   7   2         75.48         72.15         6.30 o
  -1   7   2         96.79        107.91         5.14 o
   0   7   2        649.25        675.66        15.35 o
   1   7   2       1844.22       1896.04        65.95 o
   2   7   2       2584.05       2545.23        84.47 o
   3   7   2       1770.02       1675.72        94.76 o
   4   7   2        622.78        606.88        63.42 o
   5   7   2        169.69        167.54        13.81 o
   6   7   2        182.68        202.79        24.96 o
   7   7   2        171.08        208.14        35.21 o
 -10   8   2        209.80        247.43        20.97 o
  -9   8   2        540.97        642.22        39.94 o
  -8   8   2       1199.80       1213.18        52.54 o
  -7   8   2        787.26        842.05        33.66 o
  -6   8   2        138.91        147.27        10.61 o
  -5   8   2        101.38         91.46         8.60 o
  -4   8   2          4.90          4.59         3.03 o
  -3   8   2         19.42         25.55         4.70 o
  -2   8   2        263.59        264.84        10.89 o
  -1   8   2       1096.17       1149.10        29.09 o
   0   8   2       1510.30       1536.73        33.90 o
   1   8   2       2035.56       2103.80        51.56 o
   2   8   2       1248.87       1379.80        60.47 o
   3   8   2        567.57        549.90        24.68 o
   4   8   2        227.83        218.39        12.38 o
   5   8   2        159.33        165.96        16.00 o
   6   8   2        219.14        224.20        29.63 o
  -9   9   2        276.37        277.92        30.81 o
  -8   9   2        257.64        281.93        23.68 o
  -7   9   2        116.57        100.46        10.64 o
  -6   9   2          1.77          6.91         4.83 o
  -5   9   2          3.98          4.13         4.35 o
  -4   9   2          4.14          3.82         3.11 o
  -3   9   2        229.11        243.40        12.37 o
  -2   9   2       1104.49       1168.74        32.23 o
  -1   9   2       2025.45       2013.79        47.49 o
   0   9   2       1801.30       1915.68        48.42 o
   1   9   2       1192.90       1305.43        43.04 o
   2   9   2        334.03        349.04        23.98 o
   3   9   2        115.26        141.20        12.99 o
   4   9   2        125.78        136.88        18.59 o
   5   9   2        185.15        180.89        13.95 o
  -8  10   2         74.70         52.12         8.89 o
  -7  10   2          1.01         -0.29         2.45 o
  -6  10   2          1.18          0.68         3.55 o
  -5  10   2        101.35        104.35        12.52 o
  -4  10   2        324.84        361.83        20.25 o
  -3  10   2       1200.39       1208.51        33.17 o
  -2  10   2       1816.44       1854.55        55.50 o
  -1  10   2       1291.92       1327.75        38.74 o
   0  10   2        435.89        445.05        16.18 o
   1  10   2        152.64        160.99        12.21 o
   2  10   2         51.87         53.01         7.50 o
   3  10   2         76.42         41.93        15.67 o
   4  10   2         67.99         46.62        20.11 o
  -7  11   2          5.75          4.64         6.09 o
  -6  11   2        115.27        106.67        15.34 o
  -5  11   2        509.27        514.71        34.31 o
  -4  11   2        945.43        989.74        28.92 o
  -3  11   2       1016.19       1045.17        37.37 o
  -2  11   2        612.97        624.50        23.61 o
  -1  11   2        205.73        216.87        11.05 o
   0  11   2         20.06         15.38         4.17 o
   1  11   2          9.91         13.77         4.73 o
   2  11   2         19.17         27.32        14.28 o
  -4  12   2        407.25        402.21        32.99 o
  -3  12   2        249.22        231.76        23.52 o
  -2  12   2         39.43         19.08         9.60 o
  -1  12   2          2.80         -0.07         3.73 o
  -2 -12   3          3.90         -0.14         4.93 o
  -1 -12   3          7.95          5.85         3.69 o
   0 -12   3         82.67         78.66        14.54 o
   1 -12   3        535.19        542.59        34.02 o
   2 -12   3       1124.29       1074.61        77.59 o
   3 -12   3        738.89        804.39        66.41 o
   4 -12   3        361.97        428.23        49.38 o
   5 -12   3        132.30          4.64        16.99 o
   6 -12   3         98.31          3.96        16.98 o
  -4 -11   3          0.41          0.87         7.98 o
  -3 -11   3         21.61         -3.36         9.29 o
  -2 -11   3         31.57         16.03         9.40 o
  -1 -11   3        392.90        409.92        21.60 o
   0 -11   3       1226.72       1189.78        34.76 o
   1 -11   3       1496.12       1428.59        97.52 o
   2 -11   3       1184.17       1276.90        56.12 o
   3 -11   3        466.75        485.27        30.73 o
   4 -11   3        178.36        205.31        28.57 o
   5 -11   3         78.02        100.58        22.69 o
   6 -11   3         89.94          0.04         5.44 o
   7 -11   3        177.88        196.47        35.00 o
  -5 -10   3          3.78         -2.15        16.21 o
  -4 -10   3          2.87          0.77        11.76 o
  -3 -10   3        179.27        202.97        30.97 o
  -2 -10   3       1503.90       1517.10        62.96 o
  -1 -10   3       2363.27       2379.02        71.47 o
   0 -10   3       2562.45       2715.08        76.99 o
   1 -10   3       1942.12       1929.22       107.92 o
   2 -10   3        580.71        543.08        56.73 o
   3 -10   3         73.86         97.63        18.75 o
   4 -10   3        177.35        195.57        26.38 o
   5 -10   3        160.87        158.73        25.33 o
   6 -10   3        461.60        380.59        42.55 o
   7 -10   3        507.24        423.96        31.26 o
   8 -10   3        283.12        232.22        42.81 o
  -6  -9   3          0.90         -2.18         5.74 o
  -5  -9   3         74.71          2.02         5.66 o
  -4  -9   3        600.55        671.40        57.77 o
  -3  -9   3       1651.26       1650.28       138.12 o
  -2  -9   3       3831.18       4225.74       228.58 o
  -1  -9   3       2950.55       3107.87       104.60 o
   0  -9   3       1684.65       1720.80        47.18 o
   1  -9   3        487.58        506.17        32.10 o
   2  -9   3        141.48        135.90        15.21 o
   3  -9   3         14.79         39.53        20.67 o
   4  -9   3         80.30        133.67        20.33 o
   5  -9   3        447.40        354.16        31.36 o
   6  -9   3        735.62        680.33        29.22 o
   7  -9   3        521.32        484.50        36.83 o
   8  -9   3        226.57        200.76        59.25 o
   9  -9   3         49.65         32.04        17.06 o
  -7  -8   3          2.86          3.37         6.66 o
  -6  -8   3        153.45        117.83        82.72 o
  -5  -8   3        860.28        788.51       129.50 o
  -4  -8   3       2055.66       1977.18       250.12 o
  -3  -8   3       3441.07       3845.10       203.43 o
  -2  -8   3       3644.07       3827.54       237.55 o
  -1  -8   3        889.47        927.18        32.79 o
   0  -8   3        368.49        403.18        12.10 o
   1  -8   3          9.43         12.09         3.11 o
   2  -8   3        267.33        210.06        34.32 o
   3  -8   3         42.42         54.41        21.77 o
   4  -8   3       1027.47        813.12        35.25 o
   5  -8   3       1110.35       1004.51        41.16 o
   6  -8   3        808.03        732.04        34.10 o
   7  -8   3        346.70        329.98        22.28 o
   8  -8   3         60.53         64.74        22.49 o
   9  -8   3         32.34         33.25        11.52 o
  10  -8   3         30.68         33.90        15.19 o
  -8  -7   3         11.78         26.75        17.45 o
  -7  -7   3        212.37        192.74        23.98 o
  -6  -7   3       1157.35       1153.15       103.81 o
  -5  -7   3       2443.59       2304.88       302.08 o
  -4  -7   3       3474.15       3174.02       347.11 o
  -3  -7   3       2372.04       2098.51       230.24 o
  -2  -7   3        404.32        470.42        32.40 o
  -1  -7   3         92.30         96.70        14.59 o
   0  -7   3        366.71        377.85        12.82 o
   1  -7   3         10.00         28.98         4.58 o
   2  -7   3       2147.41       2178.53       121.74 o
   4  -7   3       4470.50       4335.17       134.42 o
   5  -7   3       2633.89       2342.90        76.52 o
   6  -7   3        606.35        587.04        17.87 o
   7  -7   3        236.84        253.26        15.77 o
   8  -7   3        100.88         93.24        26.01 o
   9  -7   3        146.74        187.38        18.37 o
  10  -7   3        211.00        209.07        17.32 o
  -9  -6   3        114.56        116.41        24.18 o
  -8  -6   3        298.46        289.30        32.42 o
  -7  -6   3       1006.07       1028.29        66.82 o
  -6  -6   3       2068.53       2060.90       153.47 o
  -5  -6   3       2247.73       2192.31       237.41 o
  -4  -6   3        986.91        868.57        58.98 o
  -3  -6   3        183.33        211.87        14.65 o
  -2  -6   3         20.38         18.77         7.98 o
  -1  -6   3        326.87        314.48        34.57 o
   0  -6   3        328.30        380.24        12.44 o
   1  -6   3       2944.41       3074.06        74.64 o
   2  -6   3       4373.10       4537.90       221.80 o
   3  -6   3       8092.63       7738.86       197.71 o
   4  -6   3       4108.12       3644.66        85.67 o
   5  -6   3       1651.85       1584.70        41.72 o
   6  -6   3        321.19        358.56        19.25 o
   7  -6   3        342.41        334.45        34.31 o
   8  -6   3        161.85        164.27        20.85 o
   9  -6   3        288.24        338.07        39.55 o
  10  -6   3        282.35        314.53        47.25 o
  -9  -5   3        232.19        256.74        40.57 o
  -8  -5   3        562.26        666.45        92.24 o
  -7  -5   3       1673.49       1722.78       194.98 o
  -6  -5   3       1233.17       1248.68       103.08 o
  -5  -5   3        230.90        219.22        21.34 o
  -4  -5   3          4.08         18.67         8.00 o
  -3  -5   3        505.20        480.86        26.37 o
  -2  -5   3        440.62        450.95        18.06 o
  -1  -5   3       1821.09       2039.09        81.50 o
   0  -5   3       6614.34       7658.38       422.97 o
   1  -5   3      13400.04      15158.11       812.32 o
   2  -5   3      11369.21      11472.00       484.16 o
   3  -5   3       4543.03       4048.00        91.41 o
   4  -5   3       2677.01       2754.79        61.98 o
   5  -5   3        426.34        455.33        25.85 o
   6  -5   3         43.75         52.02         9.83 o
   7  -5   3        624.77        678.09        38.33 o
   8  -5   3        286.79        312.32        32.99 o
   9  -5   3        479.61        509.83        52.09 o
  10  -5   3        303.17        273.53        53.28 o
  11  -5   3         58.81         65.47        35.94 o
 -10  -4   3        169.98        229.22        33.94 o
  -9  -4   3        498.06        569.47        70.79 o
  -8  -4   3        917.75        855.20        77.96 o
  -7  -4   3        926.44        909.83       106.61 o
  -6  -4   3         55.29         70.14        20.74 o
  -5  -4   3        141.60        129.95        17.08 o
  -4  -4   3        349.69        318.61        20.74 o
  -3  -4   3         46.99         41.25         7.79 o
  -2  -4   3       4381.63       4461.38       152.93 o
  -1  -4   3      10859.28      12242.76       609.57 o
   0  -4   3      15128.23      18542.44      1036.73 o
   1  -4   3      17875.16      20544.37      1177.38 o
   2  -4   3       4095.33       3520.23       132.33 o
   3  -4   3       3881.52       4026.50       164.66 o
   4  -4   3         26.07         35.67         5.72 o
   5  -4   3        106.99        107.18        12.40 o
   6  -4   3        452.66        433.79        31.59 o
   7  -4   3       1262.59       1209.48        86.94 o
   8  -4   3        803.41        754.30        56.91 o
   9  -4   3        647.49        724.12        90.29 o
  10  -4   3        112.01        147.93        29.91 o
  11  -4   3         11.71         22.92        16.20 o
 -10  -3   3        385.46        413.95        53.39 o
  -9  -3   3        503.49        529.91        78.38 o
  -8  -3   3        379.22        354.45        29.71 o
  -7  -3   3        151.06        166.76        24.18 o
  -6  -3   3         41.51         36.54         9.35 o
  -5  -3   3         60.91         75.01        12.65 o
  -4  -3   3       2423.63       2452.75        80.90 o
  -3  -3   3       5736.20       5917.00       190.02 o
  -2  -3   3      17782.61      19776.94       809.18 o
  -1  -3   3      25185.22      28493.69      1270.24 o
   0  -3   3      13796.09      16555.19       629.93 o
   1  -3   3       3694.66       3689.92       133.42 o
   2  -3   3        180.31        127.86         7.59 o
   3  -3   3        831.01        959.03        36.86 o
   4  -3   3         35.50         47.79         5.89 o
   5  -3   3        284.44        306.78        24.46 o
   6  -3   3       1450.32       1370.00        56.31 o
   7  -3   3       2512.04       2520.59       158.18 o
   8  -3   3        407.28        502.02        49.01 o
   9  -3   3        180.41        209.29        34.31 o
  10  -3   3         24.45         48.01        17.24 o
  11  -3   3          5.04         18.37        15.15 o
 -11  -2   3        230.24        289.20        49.79 o
 -10  -2   3        263.02        249.45        39.67 o
  -9  -2   3         69.20         95.98        19.75 o
  -8  -2   3         96.37        115.10        21.24 o
  -7  -2   3         26.47         20.74         8.77 o
  -6  -2   3        226.86        240.41        21.55 o
  -5  -2   3       2696.33       2586.10       145.72 o
  -4  -2   3       8772.07       9178.49       335.22 o
  -3  -2   3      12891.39      13613.24       496.55 o
  -2  -2   3      14270.98      16776.05       641.88 o
  -1  -2   3       6486.52       7554.67       227.02 o
   0  -2   3       1252.57       1607.75        40.47 o
   1  -2   3         52.67         78.29         2.47 o
   2  -2   3        849.49        840.78        21.69 o
   3  -2   3        361.24        455.13        20.31 o
   4  -2   3        496.19        517.31        17.22 o
   5  -2   3       3129.05       3015.32        98.40 o
   6  -2   3       3037.74       2895.76       176.02 o
   7  -2   3       1175.55       1279.71       121.67 o
   8  -2   3        451.06        448.16        39.41 o
   9  -2   3        284.59        376.66        32.80 o
  10  -2   3         71.64        102.22        28.34 o
  11  -2   3         66.68         76.95        22.50 o
 -11  -1   3        191.61        213.89        41.88 o
 -10  -1   3        134.16        119.92        92.17 o
  -9  -1   3         66.70         81.32        21.93 o
  -8  -1   3        147.85        136.21        24.41 o
  -7  -1   3        488.23        485.23        36.65 o
  -6  -1   3       2757.04       2570.95       188.69 o
  -5  -1   3       9397.73       8830.16       665.17 o
  -4  -1   3      14371.49      14921.12       798.86 o
  -3  -1   3      12104.71      13742.98       675.26 o
  -2  -1   3      11360.27      14445.15       525.55 o
  -1  -1   3          8.92         22.30         1.94 o
   0  -1   3       2246.28       2640.78       125.87 o
   1  -1   3        942.95        723.19        15.69 o
   2  -1   3        175.55        220.30         7.82 o
   3  -1   3       4516.07       4255.09       112.79 o
   4  -1   3       6832.52       6511.58       208.45 o
   5  -1   3       5451.59       5090.49       171.28 o
   6  -1   3       2258.57       2283.61       218.83 o
   7  -1   3        768.08        747.81        41.10 o
   8  -1   3        139.85        199.04        20.96 o
   9  -1   3        130.05        140.60        21.60 o
  10  -1   3        134.83        106.14        35.47 o
  11  -1   3        152.65        175.13        30.17 o
 -11   0   3        143.00         77.09        97.65 o
 -10   0   3         45.43         31.12        32.38 o
  -9   0   3         69.69         76.64        17.29 o
  -8   0   3        445.46        575.07        52.64 o
  -7   0   3       1199.11       1225.36        63.12 o
  -6   0   3       4828.33       4667.66       432.52 o
  -5   0   3       8153.96       7303.42       314.32 o
  -4   0   3      10368.13      10293.57       364.19 o
  -3   0   3       1370.75       1532.26        37.21 o
  -2   0   3        557.57        609.51        11.39 o
  -1   0   3        585.04        588.50        15.40 o
   0   0   3         49.95         18.77         1.41 o
   1   0   3        485.85        389.26         9.73 o
   2   0   3      14253.56      15335.10       541.26 o
   3   0   3      12382.28      12041.12       430.37 o
   4   0   3       7189.93       6340.42       197.36 o
   5   0   3       3827.53       3620.57       119.81 o
   6   0   3        620.90        540.42        24.85 o
   7   0   3         44.27         65.85        19.04 o
   8   0   3         29.29         24.62         9.49 o
   9   0   3         92.76         94.97        18.34 o
  10   0   3        177.50        185.85        26.31 o
 -11   1   3         15.18          7.39        12.33 o
 -10   1   3         23.36         15.92        20.21 o
  -9   1   3        314.03        383.03        50.86 o
  -8   1   3        926.18        999.65        49.94 o
  -7   1   3       2455.36       2471.17       108.03 o
  -6   1   3       2101.86       1903.58        70.49 o
  -5   1   3        476.02        412.96        27.29 o
  -4   1   3        434.81        412.76        14.92 o
  -3   1   3       2091.64       2107.84        88.23 o
  -2   1   3         26.89         57.59         3.36 o
  -1   1   3        423.76        523.81        10.77 o
   0   1   3       4232.69       4077.24       111.06 o
   1   1   3      20009.40      20535.05       769.97 o
   2   1   3      12347.40      11201.51       379.53 o
   3   1   3       6327.12       4970.67       208.84 o
   4   1   3       3600.81       3129.29        93.25 o
   5   1   3        731.72        612.87        41.50 o
   6   1   3         33.38         47.01         7.97 o
   7   1   3         37.48         25.21         8.16 o
   8   1   3        241.72        255.87        22.45 o
   9   1   3        332.17        354.03        31.24 o
  10   1   3        202.10        213.54        47.23 o
 -11   2   3          8.80          1.87         8.32 o
 -10   2   3         69.35         80.80        68.35 o
  -9   2   3        592.09        689.86        55.01 o
  -8   2   3       1042.81       1140.22        62.03 o
  -7   2   3       1484.08       1439.95        55.47 o
  -6   2   3        740.33        695.28        22.14 o
  -5   2   3         16.84         19.03         5.01 o
  -4   2   3          6.69         10.59         4.99 o
  -3   2   3        109.85         81.28         8.04 o
  -2   2   3       3275.08       2960.80       124.81 o
  -1   2   3      14134.25      16545.28       490.25 o
   0   2   3      19943.44      21573.88      1226.59 o
   1   2   3      21195.79      21979.06       843.08 o
   2   2   3      15648.67      14556.67       813.04 o
   3   2   3       2030.07       1683.14        40.47 o
   4   2   3        168.31        172.76        10.27 o
   5   2   3          4.94          5.33         4.42 o
   6   2   3          5.43          5.77         7.42 o
   7   2   3        457.69        465.03        26.35 o
   8   2   3        466.02        429.13        77.52 o
   9   2   3        259.93        282.67        31.84 o
  10   2   3        101.90        132.23        25.58 o
 -11   3   3         88.38         86.26        30.08 o
 -10   3   3        396.82        438.96        48.86 o
  -9   3   3        967.36       1009.19        62.74 o
  -8   3   3        663.10        692.09        42.76 o
  -7   3   3        450.05        421.57        18.79 o
  -6   3   3         13.07         11.99         3.91 o
  -5   3   3         48.41         67.14         7.10 o
  -4   3   3        335.71        299.70        11.35 o
  -3   3   3       2841.54       2660.71       113.65 o
  -2   3   3      12631.77      13381.20       540.87 o
  -1   3   3      16514.80      17247.42       517.49 o
   0   3   3      12471.01      14277.22       730.23 o
   1   3   3      10162.42      10671.59       510.05 o
   2   3   3        343.39        325.24        28.11 o
   3   3   3          7.79          6.22         2.64 o
   4   3   3          9.21         10.67         4.14 o
   5   3   3         38.25         39.79         6.38 o
   6   3   3        582.42        558.43        32.88 o
   7   3   3        743.10        693.02        71.66 o
   8   3   3        511.66        550.19        32.68 o
   9   3   3        214.87        280.27        26.42 o
 -11   4   3        237.85        240.86        31.18 o
 -10   4   3        461.14        517.02        36.76 o
  -9   4   3        483.07        521.20        27.92 o
  -8   4   3        160.50        181.74        22.40 o
  -7   4   3        228.74        248.08        17.68 o
  -6   4   3        226.84        254.38        15.12 o
  -5   4   3        881.41        863.65        27.44 o
  -4   4   3       3349.72       3138.89       104.91 o
  -3   4   3       8838.01       8835.32       200.41 o
  -2   4   3      14701.83      15312.48       518.77 o
  -1   4   3       6573.27       7278.80       263.42 o
   0   4   3       1567.96       1494.46        33.24 o
   1   4   3         85.29        115.34         6.76 o
   2   4   3        673.80        624.35        15.77 o
   3   4   3        195.97        158.49        11.04 o
   4   4   3        344.50        305.41        14.46 o
   5   4   3       1326.10       1237.22        87.63 o
   6   4   3        951.02        861.35        37.25 o
   7   4   3       1013.37        984.91        75.73 o
   8   4   3        322.19        398.79        43.65 o
   9   4   3         71.92         93.46        17.56 o
 -11   5   3        234.42        282.20        45.91 o
 -10   5   3        255.07        262.94        22.02 o
  -9   5   3        174.61        167.25        16.78 o
  -8   5   3        111.53        120.16        15.04 o
  -7   5   3        250.85        278.50        16.18 o
  -6   5   3       1052.81       1021.60        31.81 o
  -5   5   3       3788.14       3653.48       103.64 o
  -4   5   3       6869.31       6800.68       158.66 o
  -3   5   3       6740.31       6672.92       149.87 o
  -2   5   3       2193.39       2139.82        45.40 o
  -1   5   3         96.98        103.87         4.11 o
   0   5   3        143.64        127.39         3.88 o
   1   5   3        391.90        343.54        18.61 o
   2   5   3          2.45          3.32         1.96 o
   3   5   3       1473.40       1365.34        74.24 o
   4   5   3       1560.61       1518.73        97.52 o
   5   5   3       1551.74       1536.69       105.78 o
   6   5   3       1129.87       1068.83        50.13 o
   7   5   3        383.62        433.59        48.85 o
   8   5   3         67.83         91.05        18.74 o
 -10   6   3        124.23        137.78        41.81 o
  -9   6   3         82.32         99.10        16.13 o
  -8   6   3         93.88        142.68        16.35 o
  -7   6   3        495.31        501.88        24.96 o
  -6   6   3       1469.75       1482.48        40.06 o
  -5   6   3       2065.53       1958.52        50.65 o
  -4   6   3       2590.54       2394.60        49.38 o
  -3   6   3        732.80        725.33        15.21 o
  -2   6   3         21.10         25.13         4.30 o
  -1   6   3        449.85        434.70         9.88 o
   0   6   3        217.07        185.58         7.91 o
   1   6   3         68.91         62.62         7.32 o
   2   6   3        655.12        578.85        18.35 o
   3   6   3       1781.62       1736.43        51.00 o
   4   6   3       2502.94       2311.55       157.65 o
   5   6   3       1430.22       1310.01        48.15 o
   6   6   3        296.29        302.43        27.42 o
   7   6   3         73.98         57.61        12.03 o
   8   6   3          7.10         16.02         9.01 o
 -10   7   3          8.36         11.34         7.90 o
  -9   7   3          9.12         14.30         7.86 o
  -8   7   3        193.02        206.66        18.70 o
  -7   7   3        766.54        815.02        40.38 o
  -6   7   3       1580.25       1471.16        40.65 o
  -5   7   3        622.47        601.60        17.51 o
  -4   7   3        407.05        418.97        12.31 o
  -3   7   3          4.60          8.35         4.17 o
  -2   7   3        118.95        114.82         6.52 o
  -1   7   3         17.03         18.22         2.99 o
   0   7   3        906.23        827.47        18.97 o
   1   7   3       1726.95       1756.47        47.73 o
   2   7   3       3430.48       3662.76       136.92 o
   3   7   3       2799.96       2711.34        76.07 o
   4   7   3        887.65        834.93        26.69 o
   5   7   3        205.30        192.21        15.07 o
   6   7   3         19.33         22.96         6.62 o
   7   7   3          7.78         -0.28        10.98 o
  -9   8   3        159.56        166.66        20.21 o
  -8   8   3        500.46        512.57        26.61 o
  -7   8   3        626.57        587.16        25.06 o
  -6   8   3        382.27        396.24        17.28 o
  -5   8   3         63.45         59.83         8.94 o
  -4   8   3         94.16         95.77         7.04 o
  -3   8   3          8.65          7.00         4.12 o
  -2   8   3        419.74        397.79        11.45 o
  -1   8   3       1555.12       1573.64        36.33 o
   0   8   3       2878.35       2892.08        66.05 o
   1   8   3       3172.50       3249.53        76.30 o
   2   8   3       2162.16       2255.66        79.54 o
   3   8   3        620.93        652.43        27.59 o
   4   8   3         88.08         80.69         6.96 o
   5   8   3          2.56          0.82         3.40 o
   6   8   3          3.92          2.01         3.46 o
  -9   9   3        139.00        125.14        15.91 o
  -8   9   3        279.78        287.92        22.75 o
  -7   9   3        253.27        299.61        19.38 o
  -6   9   3        166.38        166.36        10.35 o
  -5   9   3         24.90         27.48        10.83 o
  -4   9   3        245.01        271.06        14.78 o
  -3   9   3        317.44        327.03        14.53 o
  -2   9   3       1123.36       1154.80        29.89 o
  -1   9   3       2087.34       2155.75        52.76 o
   0   9   3       2169.01       2235.68        53.59 o
   1   9   3       1026.43       1123.36        29.30 o
   2   9   3        250.85        274.24        11.08 o
   3   9   3          2.19          2.90         4.50 o
   4   9   3          5.54          8.43         6.36 o
   5   9   3          4.55          3.74         6.19 o
  -8  10   3        165.46        179.49        15.64 o
  -7  10   3         59.96         71.18        14.15 o
  -6  10   3         24.18         37.14         8.17 o
  -5  10   3         69.65         61.50         9.13 o
  -4  10   3        351.52        395.51        15.02 o
  -3  10   3        649.08        670.98        26.00 o
  -2  10   3       1569.83       1524.98        41.21 o
  -1  10   3       1086.70       1090.50        27.84 o
   0  10   3        383.48        364.01        14.92 o
   1  10   3         40.64         36.86        14.74 o
   2  10   3          0.32         11.91        18.88 o
  -6  11   3         54.01         50.98         9.80 o
  -5  11   3        218.68        230.44        19.21 o
  -4  11   3        556.26        553.26        65.03 o
  -3  11   3        530.49        489.70        37.75 o
  -2  11   3        439.42        413.10        34.73 o
  -1  11   3        129.07        153.81        22.62 o
   0  11   3          1.17          3.39         7.46 o
   1  11   3          7.19          3.86         8.49 o
  -2 -12   4          6.47          0.65         5.46 o
  -1 -12   4         11.83          5.16         8.45 o
   0 -12   4        138.11         82.32        71.68 o
   1 -12   4        540.94        582.40        39.44 o
   2 -12   4       1321.06       1367.36        68.69 o
   3 -12   4       1245.66       1271.74        64.88 o
   4 -12   4        539.99        616.83        49.15 o
   5 -12   4        168.54        190.42        34.62 o
  -4 -11   4         56.30          5.28        12.53 o
  -3 -11   4         13.77         -3.85        10.45 o
  -2 -11   4         43.78         27.68        12.55 o
  -1 -11   4        559.87        511.82        41.19 o
   0 -11   4       1356.37       1243.92       102.20 o
   1 -11   4       1942.58       2032.04       100.59 o
   2 -11   4       1727.38       1848.11        91.88 o
   3 -11   4        823.31        892.21        57.38 o
   4 -11   4        216.66        220.53        32.45 o
   5 -11   4         12.84         -6.06        10.65 o
   6 -11   4          1.69         -1.31        13.93 o
   7 -11   4         25.44         24.01        29.77 o
  -5 -10   4         51.62         -2.49        18.61 o
  -4 -10   4         55.62          1.83        15.42 o
  -3 -10   4        224.21        197.67        33.27 o
  -2 -10   4        785.03        847.45        40.22 o
  -1 -10   4       2129.24       2069.43        59.90 o
   0 -10   4       2360.55       2387.40        66.06 o
   1 -10   4       1681.34       1568.20       144.29 o
   2 -10   4        621.03        592.77        40.27 o
   3 -10   4         15.09         20.05        12.47 o
   4 -10   4         20.05          3.38        13.74 o
   5 -10   4          1.50         -1.42        11.92 o
   6 -10   4         84.00         91.09        24.57 o
   7 -10   4        434.20        450.93        42.53 o
   8 -10   4        455.23        438.89        46.31 o
  -6  -9   4         68.77         34.67        40.50 o
  -5  -9   4        231.21        226.93        23.87 o
  -4  -9   4        590.24        637.12        58.17 o
  -3  -9   4       1124.62       1152.39        79.83 o
  -2  -9   4       2506.56       2444.52       178.80 o
  -1  -9   4       2463.39       2657.58        69.78 o
   0  -9   4        832.04        882.72        25.27 o
   1  -9   4        401.31        378.36        23.14 o
   2  -9   4        110.98        167.97        24.06 o
   3  -9   4          0.96         -5.91         8.10 o
   4  -9   4         52.16         57.70        28.04 o
   5  -9   4        481.27        463.51        31.03 o
   6  -9   4        882.15        743.97        58.77 o
   7  -9   4        985.76        900.16        73.41 o
   8  -9   4        536.41        501.21        48.87 o
   9  -9   4        243.69        199.30        58.12 o
  -7  -8   4        111.61         96.25        81.19 o
  -6  -8   4        163.84        170.88        22.31 o
  -5  -8   4        398.84        365.37        42.33 o
  -4  -8   4       1106.59       1010.09       141.61 o
  -3  -8   4       1607.89       1596.89       129.53 o
  -2  -8   4       1843.44       1907.57       100.51 o
  -1  -8   4       1121.25       1099.82        36.90 o
   0  -8   4         92.07        103.01         6.33 o
   1  -8   4         63.90         42.52         8.16 o
   2  -8   4        373.83        410.38        33.15 o
   3  -8   4         16.35         18.94        10.62 o
   4  -8   4       1293.37       1348.87       103.34 o
   5  -8   4       2293.91       1996.91       116.23 o
   6  -8   4       2208.86       2123.19        90.71 o
   7  -8   4       1292.25       1210.13        71.91 o
   8  -8   4        218.61        231.39        16.83 o
   9  -8   4         30.39         24.04        11.44 o
  -8  -7   4         70.83         83.54        20.83 o
  -7  -7   4         67.61         70.40        22.38 o
  -6  -7   4        228.45        215.81        30.99 o
  -5  -7   4        937.17        878.61        95.11 o
  -4  -7   4       1206.68       1191.22        90.77 o
  -3  -7   4       1122.91       1073.82        81.92 o
  -2  -7   4        945.53       1004.90        82.08 o
  -1  -7   4         17.03         43.40        20.50 o
   0  -7   4        291.54        272.71         9.22 o
   1  -7   4          7.84         19.11         7.93 o
   2  -7   4        734.54        782.95        44.59 o
   3  -7   4       2868.82       3013.93       142.35 o
   4  -7   4       3613.32       3177.14        94.42 o
   5  -7   4       3641.25       3425.43       125.30 o
   6  -7   4       1330.77       1178.71        67.47 o
   7  -7   4        251.57        275.52        12.97 o
   8  -7   4         38.91         33.63        13.02 o
   9  -7   4         14.07          8.54         6.78 o
  10  -7   4         10.08          7.78         9.02 o
  -9  -6   4         40.07         48.85        23.75 o
  -8  -6   4         39.66         48.29        16.42 o
  -7  -6   4        175.33        164.17        26.38 o
  -6  -6   4        726.36        684.56        46.43 o
  -5  -6   4       1024.39       1002.56        80.25 o
  -4  -6   4        905.37        836.77        65.77 o
  -3  -6   4        446.53        448.90        23.23 o
  -2  -6   4         71.51         96.85        15.54 o
  -1  -6   4         48.66         60.83        12.33 o
   0  -6   4        938.59        938.33        20.19 o
   1  -6   4       4728.76       5182.94       234.70 o
   2  -6   4       8843.99       9486.82       479.00 o
   3  -6   4       7474.28       6735.14       167.66 o
   4  -6   4       6835.02       6690.62       178.35 o
   5  -6   4       1694.46       1582.81        40.11 o
   6  -6   4        214.38        218.49        21.45 o
   7  -6   4         35.30         37.65        10.96 o
   8  -6   4         14.07         14.32        12.22 o
   9  -6   4         70.26         37.32        42.80 o
  10  -6   4        174.90        207.39        31.27 o
  -9  -5   4         19.53         29.71        14.84 o
  -8  -5   4        124.06        120.81        25.51 o
  -7  -5   4        470.93        467.08        42.06 o
  -6  -5   4       1298.35       1221.10        81.17 o
  -5  -5   4       1793.15       1676.18       133.44 o
  -4  -5   4       1003.33       1089.82        52.83 o
  -3  -5   4        688.16        730.75        34.14 o
  -2  -5   4        428.85        440.66        22.04 o
  -1  -5   4       2008.63       2071.84       109.82 o
   0  -5   4       8028.68       9270.32       581.25 o
   1  -5   4      11223.61      12608.50       657.27 o
   2  -5   4       9229.64       9329.30       454.93 o
   3  -5   4       5725.85       5726.70       139.17 o
   4  -5   4       1168.67       1121.24        57.54 o
   5  -5   4         87.73         86.09        12.99 o
   6  -5   4        101.28         94.12        14.33 o
   7  -5   4          5.31         14.59         7.72 o
   8  -5   4        142.18        140.04        31.58 o
   9  -5   4        271.52        287.44        35.91 o
  10  -5   4        394.84        464.36        88.74 o
 -10  -4   4         11.55         24.78        16.33 o
  -9  -4   4        170.60        171.72        26.23 o
  -8  -4   4        330.50        343.51        32.80 o
  -7  -4   4       1365.62       1239.42        69.36 o
  -6  -4   4       1185.88       1138.87        76.89 o
  -5  -4   4        494.34        533.40        48.98 o
  -4  -4   4        352.31        360.83        76.63 o
  -3  -4   4       1780.06       1869.92        64.37 o
  -2  -4   4       4197.13       4153.33       131.44 o
  -1  -4   4      10512.48      11894.98       600.25 o
   0  -4   4      10792.78      12475.37       406.08 o
   1  -4   4      12103.62      14272.19       747.68 o
   2  -4   4       8373.38       9056.08       302.34 o
   3  -4   4        416.47        356.87        15.65 o
   4  -4   4         22.77         45.62        10.98 o
   5  -4   4        221.47        164.85        12.82 o
   6  -4   4         27.59         28.96        10.16 o
   7  -4   4        447.74        497.51        29.41 o
   8  -4   4        858.91        908.49        75.70 o
   9  -4   4        781.76        810.25       132.27 o
  10  -4   4        390.16        461.50        62.96 o
 -10  -3   4        174.77        174.48        37.51 o
  -9  -3   4        694.50        715.82        59.61 o
  -8  -3   4        750.21        707.29        54.72 o
  -7  -3   4       1204.90       1222.68       101.08 o
  -6  -3   4        602.99        619.55        39.77 o
  -5  -3   4        658.45        629.88        30.36 o
  -4  -3   4       1493.53       1464.09        62.99 o
  -3  -3   4       4601.06       4658.27       159.18 o
  -2  -3   4       4031.06       3842.22       107.83 o
  -1  -3   4      10916.36      12031.64       401.21 o
   0  -3   4       8106.16      10712.19       342.81 o
   1  -3   4       2766.91       3391.63       126.39 o
   2  -3   4         18.49         32.66         4.90 o
   3  -3   4        239.26        193.29         9.30 o
   4  -3   4          5.53          3.81         3.05 o
   5  -3   4        165.79        175.16        12.35 o
   6  -3   4       1290.00       1315.32        97.60 o
   7  -3   4       2671.70       2698.52       100.84 o
   8  -3   4       1343.15       1374.06       140.85 o
   9  -3   4        388.12        470.49        55.91 o
  10  -3   4        141.58        164.76        31.85 o
 -11  -2   4        156.10        184.53        78.53 o
 -10  -2   4        513.61        553.60        48.36 o
  -9  -2   4        692.27        718.05        67.54 o
  -8  -2   4        480.44        472.00        34.01 o
  -7  -2   4       1150.27       1280.05       124.85 o
  -6  -2   4        102.54        101.11        20.95 o
  -5  -2   4       1113.34       1169.58        42.01 o
  -4  -2   4       2918.16       2938.96        95.32 o
  -3  -2   4       4578.23       4489.35       137.08 o
  -2  -2   4       4650.07       5196.40       155.31 o
  -1  -2   4       5403.88       6585.23       182.30 o
   0  -2   4         54.61         72.79         3.11 o
   1  -2   4        473.45        421.77         9.82 o
   2  -2   4        832.67        813.61        35.06 o
   3  -2   4          9.36          8.54         2.85 o
   4  -2   4       1674.75       1616.79        47.28 o
   5  -2   4       3707.08       3669.34       196.00 o
   6  -2   4       4061.01       4137.46       176.46 o
   7  -2   4       2216.42       2189.48       181.58 o
   8  -2   4        498.97        577.61        43.11 o
   9  -2   4        109.20        123.53        25.24 o
  10  -2   4          5.21         -0.74         7.52 o
 -11  -1   4        266.93        341.75        43.90 o
 -10  -1   4        392.70        461.51        52.35 o
  -9  -1   4        517.42        621.18        59.22 o
  -8  -1   4        281.99        373.18        61.83 o
  -7  -1   4        416.68        440.19        66.85 o
  -6  -1   4        175.86        226.70        17.53 o
  -5  -1   4        350.69        327.23        20.67 o
  -4  -1   4        462.94        429.59        20.16 o
  -3  -1   4       2754.01       2963.72        84.38 o
  -2  -1   4       2085.78       2154.18        65.42 o
  -1  -1   4        876.87       1090.49        19.76 o
   0  -1   4         25.31         18.90         1.45 o
   1  -1   4         34.13         26.84         2.27 o
   2  -1   4        782.04        775.66        17.98 o
   3  -1   4       3262.66       2967.43        92.55 o
   4  -1   4       8411.75       8069.67       271.85 o
   5  -1   4       6878.74       6670.81       235.84 o
   6  -1   4       4386.50       4262.15       147.31 o
   7  -1   4       1799.14       1875.07        82.54 o
   8  -1   4        167.64        142.59        28.93 o
   9  -1   4         14.92         24.26        14.69 o
  10  -1   4          6.97          1.48         6.64 o
 -11   0   4        301.28        392.72        48.14 o
 -10   0   4        258.54        317.95        35.25 o
  -9   0   4         89.79         93.61        21.82 o
  -8   0   4        117.17        139.29        17.91 o
  -7   0   4        539.38        544.41        80.27 o
  -6   0   4        476.42        448.55        29.92 o
  -5   0   4       5440.97       5533.75       433.39 o
  -4   0   4       6865.98       6850.17       174.91 o
  -3   0   4       1627.43       1866.97        40.29 o
  -2   0   4         35.66         53.01         3.21 o
  -1   0   4        367.13        335.09         6.81 o
   0   0   4        847.16        854.83        20.93 o
   1   0   4       4025.44       3857.14        75.76 o
   2   0   4      10254.46      10679.67       347.51 o
   3   0   4      14942.10      15598.87       594.51 o
   4   0   4       7447.23       6889.68       220.55 o
   5   0   4       3226.50       3100.71       176.36 o
   6   0   4       1043.77       1000.72        53.89 o
   7   0   4         13.02          6.48         5.54 o
   8   0   4          0.74         -4.15         7.66 o
   9   0   4         22.26         27.92        18.65 o
  10   0   4         73.16         41.01        34.24 o
 -11   1   4        114.64         88.11        79.31 o
 -10   1   4         16.59         25.01        22.51 o
  -9   1   4         23.20         36.39        15.49 o
  -8   1   4        116.04        123.10        24.21 o
  -7   1   4        661.14        670.93        39.31 o
  -6   1   4       2589.22       2400.59       110.03 o
  -5   1   4       2646.81       2344.01        59.71 o
  -4   1   4       1978.58       1909.76        44.12 o
  -3   1   4       1434.50       1275.56        25.31 o
  -2   1   4       1694.24       1594.37        31.00 o
  -1   1   4       2125.53       2368.54        55.84 o
   0   1   4       7302.12       7611.72       211.30 o
   1   1   4       7748.89       7847.17       182.03 o
   2   1   4      14841.88      15110.65       752.16 o
   3   1   4       5353.24       4786.70       134.18 o
   4   1   4       2808.49       2592.84        77.13 o
   5   1   4        273.64        267.23        13.88 o
   6   1   4         58.19         77.49         9.69 o
   7   1   4         59.19         59.42        10.10 o
   8   1   4          7.20         16.58        13.71 o
   9   1   4        188.54        154.45        88.89 o
  10   1   4        227.61        231.72        46.16 o
 -11   2   4          5.99          8.28         7.94 o
 -10   2   4          1.35          4.52         7.33 o
  -9   2   4         65.69         67.45        12.92 o
  -8   2   4        442.34        427.35        24.97 o
  -7   2   4       1233.32       1209.91        38.96 o
  -6   2   4       1788.99       1666.05        68.41 o
  -5   2   4       2021.94       1838.13        46.81 o
  -4   2   4       2303.77       1893.03        87.03 o
  -3   2   4       1364.53       1230.51        59.95 o
  -2   2   4       3391.51       3397.01        73.20 o
  -1   2   4       5349.40       4988.80       138.91 o
   0   2   4       6675.39       7252.83       309.91 o
   1   2   4       4829.67       4225.12       313.95 o
   2   2   4       5819.81       5223.86       484.04 o
   3   2   4        556.69        515.46        43.66 o
   4   2   4         17.59         22.77         4.66 o
   5   2   4        154.82        142.18         9.86 o
   6   2   4          7.79          6.70         4.41 o
   7   2   4         40.86         61.00        10.58 o
   8   2   4        431.38        420.91        73.27 o
   9   2   4        378.01        420.64        62.29 o
 -11   3   4          1.44         -0.66         5.11 o
 -10   3   4         48.88         47.16        19.26 o
  -9   3   4        567.96        599.53        34.82 o
  -8   3   4       1063.00       1078.10        38.91 o
  -7   3   4       1598.12       1607.51        47.88 o
  -6   3   4       1678.32       1538.22        44.00 o
  -5   3   4       1244.64       1034.61        64.02 o
  -4   3   4       2741.41       2647.01       107.18 o
  -3   3   4       1195.20       1020.04        30.97 o
  -2   3   4       4515.73       4599.93        86.23 o
  -1   3   4       6413.21       6832.11       217.38 o
   0   3   4       6283.81       6338.21       272.73 o
   1   3   4       1642.23       1776.02        29.80 o
   2   3   4       1020.33        976.64        22.92 o
   3   3   4        411.92        347.50        10.06 o
   4   3   4         67.06         69.52        10.89 o
   5   3   4          9.13         15.30         7.25 o
   6   3   4        243.03        251.44        15.49 o
   7   3   4        604.31        574.62        27.87 o
   8   3   4        613.44        734.89        38.75 o
   9   3   4        332.19        441.81        52.26 o
 -11   4   4         83.40        113.13        34.63 o
 -10   4   4        332.81        326.07        30.53 o
  -9   4   4        801.76        906.08        40.55 o
  -8   4   4        773.50        813.14        31.63 o
  -7   4   4        764.74        803.13        29.88 o
  -6   4   4        622.55        602.56        19.59 o
  -5   4   4        195.60        197.39        13.47 o
  -4   4   4        442.27        384.45        13.67 o
  -3   4   4       1295.68       1198.02        38.61 o
  -2   4   4       4528.93       4808.73       113.98 o
  -1   4   4       2424.05       2565.56        79.15 o
   0   4   4        948.65       1120.31        48.53 o
   1   4   4         75.95         88.51         3.54 o
   2   4   4         10.76         14.94         2.74 o
   3   4   4        195.21        187.47         6.84 o
   4   4   4        456.23        433.21        20.07 o
   5   4   4       1061.64        927.01        78.83 o
   6   4   4       1272.75       1133.26        39.62 o
   7   4   4       1022.62       1055.02        50.42 o
   8   4   4        495.13        543.31        40.14 o
   9   4   4         87.63         92.25        20.50 o
 -11   5   4        155.64        169.34        28.47 o
 -10   5   4        428.99        515.70        44.69 o
  -9   5   4        620.54        670.99        32.32 o
  -8   5   4        310.99        370.62        22.06 o
  -7   5   4        309.74        307.80        23.04 o
  -6   5   4         69.68         86.90         8.17 o
  -5   5   4        335.69        305.84        12.58 o
  -4   5   4       1388.08       1438.80        56.35 o
  -3   5   4       1257.03       1243.29        41.49 o
  -2   5   4       2053.37       1884.84       111.61 o
  -1   5   4        716.16        735.96        37.49 o
   0   5   4        130.94        148.32        16.22 o
   1   5   4         52.42         36.87         7.95 o
   2   5   4        530.50        455.56        30.31 o
   3   5   4       1060.31       1010.48        30.69 o
   4   5   4       1871.38       1670.43        71.81 o
   5   5   4       1663.93       1559.06        60.23 o
   6   5   4       1266.71       1170.95       103.19 o
   7   5   4        458.31        454.97        36.84 o
   8   5   4         94.95         96.61        21.21 o
 -10   6   4        279.59        310.06        32.08 o
  -9   6   4        223.26        249.61        21.02 o
  -8   6   4         62.85         51.98        10.84 o
  -7   6   4         52.36         54.95        11.75 o
  -6   6   4        243.60        204.41        12.05 o
  -5   6   4        552.99        535.22        17.56 o
  -4   6   4        795.17        794.51        27.86 o
  -3   6   4       1207.33       1075.28        71.43 o
  -2   6   4        812.62        832.92        29.26 o
  -1   6   4        266.18        240.75        10.76 o
   0   6   4        651.93        565.97        27.05 o
   1   6   4       1221.24       1165.10        82.75 o
   2   6   4       1282.99       1120.85        99.20 o
   3   6   4       1671.07       1563.83        37.97 o
   4   6   4       2141.56       1984.03        79.06 o
   5   6   4       1090.29       1029.25        38.30 o
   6   6   4        239.23        223.89        23.75 o
   7   6   4         46.92         38.99         8.42 o
 -10   7   4         50.19         37.52        15.30 o
  -9   7   4          3.44          3.35         5.95 o
  -8   7   4          4.13          3.70         4.80 o
  -7   7   4        146.87        139.43        13.64 o
  -6   7   4        442.03        453.03        16.25 o
  -5   7   4        869.93        783.25        32.50 o
  -4   7   4        972.64        967.04        43.37 o
  -3   7   4        742.39        768.01        27.83 o
  -2   7   4        295.91        283.22        17.10 o
  -1   7   4        202.46        188.09         4.36 o
   0   7   4        526.41        518.47        15.49 o
   1   7   4        938.70        911.76        43.96 o
   2   7   4       1616.96       1585.40       104.68 o
   3   7   4       1593.17       1487.51       209.82 o
   4   7   4        642.88        570.96        25.10 o
   5   7   4        115.35        116.35        10.21 o
   6   7   4          3.32         -1.21         4.69 o
  -9   8   4         21.81         14.90         6.48 o
  -8   8   4        103.37        109.85        11.02 o
  -7   8   4        337.83        372.86        26.06 o
  -6   8   4        653.82        653.66        26.90 o
  -5   8   4        611.58        643.05        24.15 o
  -4   8   4        555.16        582.95        21.70 o
  -3   8   4        516.09        528.05        17.81 o
  -2   8   4        373.79        354.48         9.63 o
  -1   8   4        633.36        609.76        19.19 o
   0   8   4        983.01        962.46        29.74 o
   1   8   4       1018.60        996.23        75.28 o
   2   8   4        745.65        843.30        25.26 o
   3   8   4        330.35        324.70        45.00 o
   4   8   4         38.66         32.41         9.34 o
   5   8   4          1.12          0.49         2.60 o
  -8   9   4        209.48        243.22        15.84 o
  -7   9   4        537.29        586.99        28.73 o
  -6   9   4        567.15        616.93        26.17 o
  -5   9   4        362.40        379.35        25.01 o
  -4   9   4        384.25        429.07        13.49 o
  -3   9   4        288.65        242.90         9.80 o
  -2   9   4        210.70        195.90         9.04 o
  -1   9   4        490.27        417.29        29.40 o
   0   9   4        729.82        692.83        21.96 o
   1   9   4        352.18        364.48        38.93 o
   2   9   4        110.70        103.93        23.55 o
   3   9   4          5.64         13.11        13.14 o
  -7  10   4        349.96        363.34        17.24 o
  -6  10   4        205.67        211.77        17.66 o
  -5  10   4         77.19         89.53        14.74 o
  -4  10   4        108.23        121.12        21.52 o
  -3  10   4        114.71        103.09        31.23 o
  -2  10   4        277.58        213.99        43.18 o
  -1  10   4        377.91        380.99        58.77 o
   0  10   4        192.19        210.14        48.19 o
   1  10   4         47.66         35.55        16.24 o
   2  10   4         21.22         13.90        13.29 o
  -5  11   4         23.60         29.76        15.08 o
  -4  11   4         99.62        118.95        22.72 o
  -3  11   4        142.76        111.93        20.40 o
  -2  11   4        214.25        192.88        27.17 o
  -1  11   4        191.98        194.65        28.37 o
   0  11   4         93.73         79.86        21.06 o
  -1 -12   5        120.64         74.37        59.61 o
   0 -12   5         93.97         63.49        46.10 o
   1 -12   5        244.49        267.03        29.05 o
   2 -12   5        443.57        492.04        39.68 o
   3 -12   5        643.96        666.29        45.77 o
   4 -12   5        428.14        499.35        64.93 o
   5 -12   5        176.32         -2.49        18.35 o
  -4 -11   5        542.24        537.15        65.95 o
  -3 -11   5        333.83        336.07        49.32 o
  -2 -11   5        159.28        162.75        23.38 o
  -1 -11   5        231.83        229.76        25.80 o
   0 -11   5        423.24        466.80        41.88 o
   1 -11   5        652.14        706.75        51.79 o
   2 -11   5        725.07        736.30        52.95 o
   3 -11   5        655.18        688.84        52.73 o
   4 -11   5        293.54        248.90        37.79 o
   5 -11   5         48.69          3.43        10.76 o
   6 -11   5          1.55         -0.02         5.86 o
   7 -11   5          6.52         -0.03         6.51 o
  -5 -10   5        380.96        427.50        59.89 o
  -4 -10   5        198.80        252.80        42.54 o
  -3 -10   5        179.68        207.47        35.74 o
  -2 -10   5        105.27         76.60        28.43 o
  -1 -10   5        397.24        380.91        16.24 o
   0 -10   5        897.78        771.47        57.24 o
   1 -10   5        766.27        791.22        44.04 o
   2 -10   5        517.09        561.60        42.98 o
   3 -10   5        278.98        268.63        35.23 o
   4 -10   5          9.88         -2.58         8.73 o
   5 -10   5         20.82         -1.22         7.81 o
   6 -10   5         60.92         52.68        21.32 o
   7 -10   5        201.06        206.85        31.30 o
   8 -10   5        310.04        346.40        45.40 o
  -6  -9   5        259.57        226.43        33.21 o
  -5  -9   5        151.50        156.88        57.46 o
  -4  -9   5         95.88         80.29        40.43 o
  -3  -9   5         93.06         81.16        22.62 o
  -2  -9   5        267.20        283.44        34.40 o
  -1  -9   5       1000.26        987.46        31.27 o
   0  -9   5        534.62        499.99        37.21 o
   1  -9   5        818.17        855.19        49.78 o
   2  -9   5        631.03        636.66        42.99 o
   3  -9   5        148.71        159.35        26.15 o
   4  -9   5         85.98         97.79        23.20 o
   5  -9   5        284.92        266.18        34.91 o
   6  -9   5        551.18        626.32        45.97 o
   7  -9   5        853.08        919.44        64.00 o
   8  -9   5        642.10        644.05        49.81 o
  -7  -8   5        246.65        226.84        33.43 o
  -6  -8   5         98.28         34.31        38.77 o
  -5  -8   5         24.79         11.25        14.07 o
  -4  -8   5         45.87         55.42        19.53 o
  -3  -8   5        259.54        243.68        32.81 o
  -2  -8   5        408.39        391.40        59.23 o
  -1  -8   5       2285.47       2446.00        72.69 o
   0  -8   5       2521.31       2462.30       154.94 o
   1  -8   5       1547.24       1653.27        73.36 o
   2  -8   5        815.14        921.85        59.61 o
   3  -8   5        744.38        809.46        54.69 o
   4  -8   5        685.69        675.77        48.48 o
   5  -8   5       1702.34       1609.79       106.10 o
   6  -8   5       1400.41       1230.59        80.48 o
   7  -8   5       1128.46       1023.80       105.12 o
   8  -8   5        418.82        363.02        35.74 o
   9  -8   5         80.56         73.00        19.81 o
  -8  -7   5         84.16         80.06        20.77 o
  -7  -7   5         23.19         16.69        13.08 o
  -6  -7   5         13.36          2.59         6.72 o
  -5  -7   5         59.88         57.51        15.19 o
  -4  -7   5        498.44        443.26        28.61 o
  -3  -7   5       1258.99       1273.23       108.52 o
  -2  -7   5       2616.44       2688.63       137.54 o
  -1  -7   5       2492.47       2643.87       130.78 o
   0  -7   5        204.12        241.28        18.32 o
   1  -7   5        698.18        783.85        52.61 o
   2  -7   5        907.32        907.41        54.85 o
   3  -7   5       1283.37       1401.45        77.23 o
   4  -7   5       2755.86       2641.18       116.51 o
   5  -7   5       2313.30       2058.75        89.93 o
   6  -7   5       1197.49       1051.62        50.81 o
   7  -7   5        281.10        277.27        12.57 o
   8  -7   5         24.54         24.67         5.95 o
   9  -7   5          2.62          0.44         3.27 o
  -9  -6   5         32.91         37.99        17.67 o
  -8  -6   5          0.91          1.34        10.04 o
  -7  -6   5          5.20          3.35         7.29 o
  -6  -6   5         50.50         47.64        13.56 o
  -5  -6   5        522.57        488.84        35.68 o
  -4  -6   5       1742.45       1641.90        88.23 o
  -3  -6   5       3281.68       3074.39       152.98 o
  -2  -6   5       2781.33       3029.09       144.81 o
  -1  -6   5       2478.65       2593.27       119.87 o
   0  -6   5        917.26        955.83        42.64 o
   1  -6   5       1215.99       1263.08        62.84 o
   2  -6   5       1828.77       2006.51        94.22 o
   3  -6   5       2583.57       2729.06       123.39 o
   4  -6   5       1950.08       1568.18        72.78 o
   5  -6   5       1597.48       1595.19        59.29 o
   6  -6   5        326.80        332.69        31.19 o
   7  -6   5         43.50         44.31        11.89 o
   8  -6   5          5.77          9.29         8.71 o
   9  -6   5          2.33         -3.81        11.34 o
  10  -6   5         48.26         58.99        19.66 o
  -9  -5   5          2.31          9.86        13.34 o
  -8  -5   5         10.54         22.14        12.50 o
  -7  -5   5        132.47        143.31        26.00 o
  -6  -5   5        948.06        873.71        64.39 o
  -5  -5   5       3594.02       3480.45       164.06 o
  -4  -5   5       4260.69       3987.36       151.19 o
  -3  -5   5       3173.53       3220.02       115.84 o
  -2  -5   5       2339.33       2340.23       133.79 o
  -1  -5   5       1057.96       1088.27        51.71 o
   0  -5   5       1048.09       1174.87        39.16 o
   1  -5   5       2553.61       2815.98       121.12 o
   2  -5   5       2198.11       2543.15       110.19 o
   3  -5   5       1885.02       1552.58        81.37 o
   4  -5   5       1622.29       1681.58        62.17 o
   5  -5   5        409.34        394.48        25.37 o
   6  -5   5        117.40        108.03        13.72 o
   7  -5   5         11.64         27.58        12.19 o
   8  -5   5        114.62        157.98        20.87 o
   9  -5   5        242.40        275.13        30.50 o
  10  -5   5        276.52        331.56        40.30 o
 -10  -4   5          1.07         -4.68        16.32 o
  -9  -4   5         30.44         36.86        19.86 o
  -8  -4   5        402.71        347.69        55.01 o
  -7  -4   5       1574.95       1414.81        66.95 o
  -6  -4   5       4531.24       4571.01       230.06 o
  -5  -4   5       3635.67       3612.29       143.05 o
  -4  -4   5       2666.40       2589.88        86.29 o
  -3  -4   5       1892.10       1812.17        61.96 o
  -2  -4   5        770.20        806.55        28.24 o
  -1  -4   5        666.99        669.06        26.87 o
   0  -4   5        512.70        619.56        12.00 o
   1  -4   5       1282.36       1399.36        77.14 o
   2  -4   5       2441.29       2361.51        92.27 o
   3  -4   5        774.56        804.62        27.88 o
   4  -4   5        427.21        398.97        19.86 o
   5  -4   5        147.58        163.49        13.80 o
   6  -4   5         22.76         35.50         8.90 o
   7  -4   5        160.37        188.77        22.97 o
   8  -4   5        770.48        883.71        58.09 o
   9  -4   5        546.60        627.88        46.35 o
  10  -4   5        409.58        445.25        58.63 o
 -10  -3   5         61.61         72.06        22.55 o
  -9  -3   5        439.12        388.01        37.59 o
  -8  -3   5       1454.91       1523.01       134.57 o
  -7  -3   5       2142.08       2111.81       139.80 o
  -6  -3   5       2736.01       2721.06       134.81 o
  -5  -3   5       1489.34       1583.86        75.72 o
  -4  -3   5        259.11        231.07        15.24 o
  -3  -3   5        212.42        267.76        20.81 o
  -2  -3   5        180.84        192.09        13.49 o
  -1  -3   5       1298.35       1433.49        35.05 o
   0  -3   5       5842.82       7158.09       174.02 o
   1  -3   5       4737.47       5223.74       136.59 o
   2  -3   5       2689.57       2770.59        97.51 o
   3  -3   5        860.36        756.70        27.05 o
   4  -3   5        286.43        285.68        20.43 o
   5  -3   5        272.84        297.27        26.26 o
   6  -3   5       1072.20       1176.05        57.18 o
   7  -3   5       1629.68       1666.76        82.15 o
   8  -3   5       1559.58       1617.35       108.55 o
   9  -3   5        514.42        492.71        45.65 o
  10  -3   5        211.20        230.23        30.96 o
 -10  -2   5        397.74        440.16        45.64 o
  -9  -2   5       1060.01       1130.09        94.30 o
  -8  -2   5       1211.79       1250.56        81.89 o
  -7  -2   5       1400.94       1372.82        94.77 o
  -6  -2   5        997.32        911.50        66.96 o
  -5  -2   5          7.59         12.36         6.73 o
  -4  -2   5        172.49        234.13        18.54 o
  -3  -2   5        195.87        255.45        10.54 o
  -2  -2   5        457.09        467.59        17.26 o
  -1  -2   5       4104.38       4893.96       175.93 o
   0  -2   5       4333.64       4963.15       128.93 o
   1  -2   5       3927.31       3776.66        96.16 o
   2  -2   5       3724.50       3484.62       128.93 o
   3  -2   5        358.88        309.29        11.84 o
   4  -2   5       1897.36       1889.43        83.34 o
   5  -2   5       1541.27       1547.18        50.23 o
   6  -2   5       1330.71       1329.48        59.52 o
   7  -2   5       1173.95       1191.04        73.93 o
   8  -2   5        681.54        660.98        61.32 o
   9  -2   5        148.62        163.26        30.15 o
  10  -2   5         40.26         45.47        18.46 o
 -11  -1   5        193.58        230.41        37.49 o
 -10  -1   5        556.88        662.21        53.14 o
  -9  -1   5        670.22        742.26        85.50 o
  -8  -1   5        251.14        262.28        27.15 o
  -7  -1   5        104.92        123.01        15.61 o
  -6  -1   5         22.52         51.17        31.06 o
  -5  -1   5        213.64        220.61        18.37 o
  -4  -1   5         10.83         16.87         4.83 o
  -3  -1   5       2756.90       2975.08        67.83 o
  -2  -1   5       4547.43       4748.99       131.52 o
  -1  -1   5       7593.99       8500.67       218.30 o
   0  -1   5       6423.19       7100.61       197.81 o
   1  -1   5       3234.30       2792.24        79.15 o
   2  -1   5       1638.41       1434.76        50.27 o
   3  -1   5       2314.24       2235.52        85.81 o
   4  -1   5       2397.24       2255.71        63.84 o
   5  -1   5       1659.63       1609.87        66.57 o
   6  -1   5       1256.66       1211.42        45.63 o
   7  -1   5        509.28        435.21        32.96 o
   8  -1   5        108.08        104.60        16.01 o
   9  -1   5          3.85          9.15        10.06 o
  10  -1   5          1.20          0.90         5.83 o
 -11   0   5        274.72        354.19        44.62 o
 -10   0   5        405.32        508.06        60.52 o
  -9   0   5        141.82        144.04        27.11 o
  -8   0   5         19.43         27.03        16.43 o
  -7   0   5        119.68         95.80        13.30 o
  -6   0   5        382.16        364.73        20.23 o
  -5   0   5        184.88        191.11        10.50 o
  -4   0   5       5185.98       5328.28       137.53 o
  -3   0   5       6782.73       6716.13       167.21 o
  -2   0   5       8190.73       9327.48       210.86 o
  -1   0   5       9150.92      10325.77       278.57 o
   0   0   5       1949.13       1782.42        40.91 o
   1   0   5       1303.88       1295.73        28.51 o
   2   0   5       2591.60       2485.56        62.72 o
   3   0   5       2055.67       1911.55        56.49 o
   4   0   5       3274.23       3185.79        97.56 o
   5   0   5       1738.43       1626.53        51.37 o
   6   0   5        970.33        913.38        42.17 o
   7   0   5        245.06        261.92        25.79 o
   8   0   5          1.58          3.90         5.72 o
   9   0   5          1.30          0.62         4.78 o
  10   0   5         22.48          2.93        12.57 o
 -11   1   5        162.80        116.94        53.31 o
 -10   1   5         74.66         56.39        30.59 o
  -9   1   5          2.43          5.04         6.47 o
  -8   1   5          2.50          2.82         4.71 o
  -7   1   5        396.51        408.08        22.97 o
  -6   1   5       1718.68       1737.84       102.06 o
  -5   1   5       4338.11       4247.68       118.36 o
  -4   1   5       6282.83       5900.30       149.78 o
  -3   1   5       9404.90       9820.87       278.83 o
  -2   1   5       4359.83       4359.04        86.95 o
  -1   1   5       3670.24       3975.17        86.60 o
   0   1   5       2731.84       3327.92       108.55 o
   1   1   5       2186.41       2086.55        36.55 o
   2   1   5        955.10       1013.02        23.33 o
   3   1   5       2019.57       1974.15        48.77 o
   4   1   5       1297.51       1156.40        33.35 o
   5   1   5        634.93        603.06        26.45 o
   6   1   5        182.86        210.61        16.99 o
   7   1   5          7.79         10.80         5.97 o
   8   1   5         28.11         25.27        27.34 o
   9   1   5         74.90         -0.94         5.91 o
 -11   2   5         35.23         24.48        12.08 o
 -10   2   5          7.22          5.98         7.61 o
  -9   2   5          2.08          2.91         7.29 o
  -8   2   5        319.59        335.38        22.72 o
  -7   2   5       1498.03       1454.92        76.39 o
  -6   2   5       3102.72       2882.87        82.88 o
  -5   2   5       6055.55       5621.55       164.80 o
  -4   2   5       4850.33       4603.59       113.88 o
  -3   2   5       1954.49       1743.44        48.73 o
  -2   2   5        469.39        505.42        12.11 o
  -1   2   5        242.01        261.17         6.27 o
   0   2   5         72.53         71.16         2.49 o
   1   2   5        509.68        488.89        33.37 o
   2   2   5       1853.77       1758.39        53.42 o
   3   2   5       2037.89       1910.21        85.92 o
   4   2   5        586.07        511.49        32.10 o
   5   2   5        151.32        165.38        16.72 o
   6   2   5        146.20        132.87        13.65 o
   7   2   5        161.56        156.79        39.58 o
   8   2   5        201.35        264.87        31.74 o
   9   2   5        276.55        305.33        53.89 o
 -11   3   5          1.30          0.47         6.27 o
 -10   3   5         15.16         17.40         9.31 o
  -9   3   5        289.82        347.67        25.87 o
  -8   3   5       1449.29       1425.35        58.68 o
  -7   3   5       2270.71       2175.81        81.96 o
  -6   3   5       3768.01       3307.20       100.55 o
  -5   3   5       2293.91       2067.06        79.43 o
  -4   3   5       1018.82        864.49        31.79 o
  -3   3   5         78.75         89.98         5.99 o
  -2   3   5        301.56        311.61         8.26 o
  -1   3   5        143.33        163.34        10.29 o
   0   3   5        486.07        514.99        27.05 o
   1   3   5       1057.30       1022.05        29.32 o
   2   3   5       2217.49       2142.94        43.22 o
   3   3   5       1033.78        948.95        34.97 o
   4   3   5        224.99        238.82        15.71 o
   5   3   5        360.89        334.93        17.84 o
   6   3   5        327.64        320.25        24.40 o
   7   3   5        300.00        345.46        24.87 o
   8   3   5        402.11        418.37        30.74 o
   9   3   5        261.84        295.35        30.92 o
 -11   4   5         24.34         37.56        11.95 o
 -10   4   5        213.98        214.09        20.16 o
  -9   4   5        623.96        677.31        41.59 o
  -8   4   5       1472.31       1535.93        56.06 o
  -7   4   5       1489.56       1416.25        45.80 o
  -6   4   5       1032.80        934.58        49.22 o
  -5   4   5        111.03         87.94         9.04 o
  -4   4   5         78.11         72.94         4.52 o
  -3   4   5         49.19         92.25        47.07 o
  -2   4   5        143.42        140.12        13.23 o
  -1   4   5       1263.69       1314.83        58.59 o
   0   4   5       2730.58       2871.63       125.22 o
   1   4   5       2596.77       2575.12       115.85 o
   2   4   5       1391.19       1348.33        47.07 o
   3   4   5        472.43        445.82        20.35 o
   4   4   5        374.99        329.48        12.66 o
   5   4   5        384.42        378.39        17.36 o
   6   4   5        413.83        394.46        26.96 o
   7   4   5        344.19        363.26        23.08 o
   8   4   5        267.07        255.87        28.89 o
 -10   5   5        310.81        319.35        34.49 o
  -9   5   5        544.10        577.11        29.01 o
  -8   5   5        504.46        488.02        23.04 o
  -7   5   5         44.75         54.95         7.24 o
  -6   5   5          2.33          6.13         3.47 o
  -5   5   5        103.36         98.44         6.79 o
  -4   5   5         65.03         67.57         5.48 o
  -3   5   5        364.89        352.73         8.02 o
  -2   5   5       1595.48       1747.17        58.18 o
  -1   5   5       3678.55       3671.53       167.12 o
   0   5   5       1616.47       1627.89        79.38 o
   1   5   5        930.39        923.27        53.51 o
   2   5   5       1392.93       1296.80        63.27 o
   3   5   5        472.00        446.74        19.18 o
   4   5   5        379.82        363.29        13.37 o
   5   5   5        514.53        469.07        19.76 o
   6   5   5        359.51        334.50        16.72 o
   7   5   5        199.19        195.61        23.48 o
 -10   6   5        269.56        270.72        24.53 o
  -9   6   5        229.64        221.80        17.21 o
  -8   6   5         57.31         66.29        12.39 o
  -7   6   5          4.83          4.81         3.93 o
  -6   6   5          1.15          3.23         3.03 o
  -5   6   5        109.59        110.62         6.37 o
  -4   6   5        797.12        774.02        28.42 o
  -3   6   5       2602.72       2623.68        82.69 o
  -2   6   5       3998.88       3872.98       228.71 o
  -1   6   5       2860.36       2959.79       143.72 o
   0   6   5       2047.49       2240.19       149.38 o
   1   6   5       1087.24       1152.46        97.15 o
   2   6   5        255.81        258.39        14.06 o
   3   6   5        126.71        127.93        10.04 o
   4   6   5        418.15        396.38        13.68 o
   5   6   5        317.43        278.81        14.06 o
   6   6   5        204.53        179.66        13.67 o
   7   6   5         64.58         63.58        15.15 o
  -9   7   5         13.38          3.47         5.18 o
  -8   7   5          1.68          4.34         5.35 o
  -7   7   5         10.01          5.60         5.68 o
  -6   7   5        235.88        241.96        12.49 o
  -5   7   5        966.87        987.68        56.21 o
  -4   7   5       2108.12       2030.26       128.38 o
  -3   7   5       2554.90       2524.58        94.88 o
  -2   7   5       2037.49       2082.15       143.89 o
  -1   7   5       1012.49       1014.01        61.44 o
   0   7   5        186.89        194.59        25.41 o
   1   7   5        112.01        143.57        23.99 o
   2   7   5        152.84        143.52         7.59 o
   3   7   5        187.03        161.87        26.64 o
   4   7   5        272.57        235.61        15.33 o
   5   7   5        171.62        157.25        18.30 o
  -9   8   5          5.88          8.25         5.83 o
  -8   8   5         37.32         39.41        10.19 o
  -7   8   5        220.41        242.66        12.86 o
  -6   8   5        787.66        830.57        33.15 o
  -5   8   5       1305.02       1263.74       127.69 o
  -4   8   5        905.28        896.87        65.47 o
  -3   8   5        786.85        717.05        29.68 o
  -2   8   5        174.91        190.88        25.13 o
  -1   8   5         10.34         -2.68        11.92 o
   0   8   5         12.28         21.65        21.27 o
   1   8   5         68.64         72.85        20.04 o
   2   8   5        160.58        185.45        30.11 o
   3   8   5        249.13        265.12        38.49 o
   4   8   5        167.28        163.24        33.74 o
  -8   9   5        113.81         98.59        14.26 o
  -7   9   5        420.55        436.89        17.97 o
  -6   9   5        577.54        538.38        88.29 o
  -5   9   5        569.26        650.74        47.62 o
  -4   9   5        235.43        233.21        48.26 o
  -3   9   5         74.99         63.24        17.24 o
  -2   9   5          8.23         20.96        12.03 o
  -1   9   5          1.39         -0.32         5.40 o
   0   9   5         80.13         77.76        20.70 o
   1   9   5        271.62        258.37        57.90 o
   2   9   5        216.58        202.01        35.50 o
  -6  10   5        260.53        254.00        38.63 o
  -5  10   5         53.34         56.07        20.15 o
  -4  10   5          4.71         14.37        19.85 o
  -3  10   5          0.88          1.17        10.62 o
  -2  10   5          1.36         11.48        18.02 o
  -1  10   5        103.65         80.55        21.51 o
   0  10   5        222.03        225.01        33.89 o
   1  10   5        240.26        287.05        65.67 o
  -1 -12   6        307.72        307.17        42.34 o
   0 -12   6         34.03         17.70        22.38 o
   1 -12   6         26.84         24.99        18.07 o
   2 -12   6         64.75         40.35        34.88 o
   3 -12   6        165.46        148.03        95.91 o
   4 -12   6        336.59        352.15        61.12 o
  -3 -11   6        521.93        574.16        68.86 o
  -2 -11   6        129.91        114.60        22.24 o
  -1 -11   6          5.42          9.72         9.73 o
   0 -11   6          1.51          0.78         7.77 o
   1 -11   6         24.16         15.20        15.74 o
   2 -11   6        168.66        175.84        24.01 o
   3 -11   6        530.95        512.49        41.73 o
   4 -11   6        713.88        788.90        75.13 o
   5 -11   6        489.44        544.48        66.47 o
   6 -11   6        148.84        153.68        37.02 o
  -5 -10   6        619.23        599.48        75.38 o
  -4 -10   6        358.03        368.75        53.31 o
  -3 -10   6         43.02         52.71        23.20 o
  -2 -10   6         10.21          6.16         7.71 o
  -1 -10   6         13.95          5.19         8.18 o
   0 -10   6        136.68        161.25        22.18 o
   1 -10   6        705.81        668.20        43.78 o
   2 -10   6       1138.80       1144.17        60.74 o
   3 -10   6       1386.82       1523.00        76.56 o
   4 -10   6        689.10        697.31        66.08 o
   5 -10   6        147.11        185.80        34.79 o
   6 -10   6         62.53         71.48        25.91 o
   7 -10   6         45.05         49.82        24.87 o
  -6  -9   6        364.83        310.57        52.95 o
  -5  -9   6         99.38        121.31        33.94 o
  -4  -9   6          2.38          4.48        11.17 o
  -3  -9   6          7.02         21.06        15.63 o
  -2  -9   6          2.17          6.88        17.90 o
  -1  -9   6        126.44        124.71         5.75 o
   0  -9   6        762.12        791.00        44.37 o
   1  -9   6       1398.37       1485.22        67.08 o
   2  -9   6       1981.71       2259.84       132.43 o
   3  -9   6       1258.23       1306.12        88.69 o
   4  -9   6        374.63        420.72        47.11 o
   5  -9   6        197.06        270.74        37.14 o
   6  -9   6         83.46         91.10        26.65 o
   7  -9   6        175.65        219.97        27.46 o
   8  -9   6        252.02        248.09        32.57 o
  -7  -8   6        237.70        193.64        35.60 o
  -6  -8   6         64.12         33.19        34.94 o
  -5  -8   6          4.81          5.89         7.65 o
  -4  -8   6          3.20          7.02        11.33 o
  -3  -8   6         37.60         50.80        31.76 o
  -2  -8   6        484.09        455.96        43.75 o
  -1  -8   6       3027.98       3164.08        90.29 o
   0  -8   6       6051.03       6518.78       276.79 o
   1  -8   6       3559.20       3757.73       142.45 o
   2  -8   6       1506.15       1698.06        99.52 o
   3  -8   6        464.53        490.28        45.15 o
   4  -8   6         56.86        115.44        22.82 o
   5  -8   6         92.55         75.79        21.07 o
   6  -8   6        500.15        411.22        45.88 o
   7  -8   6        518.50        502.33        61.10 o
   8  -8   6        423.89        425.58        62.13 o
   9  -8   6        177.18        172.54        30.09 o
  -8  -7   6        159.61         91.63        69.81 o
  -7  -7   6         38.00         18.47        20.39 o
  -6  -7   6          1.28         -0.95         5.50 o
  -5  -7   6          3.56         -0.18         6.65 o
  -4  -7   6        330.97        313.18        30.54 o
  -3  -7   6       2269.67       2189.31       125.42 o
  -2  -7   6       5536.54       5630.75       299.22 o
  -1  -7   6       8273.30       8115.83       263.43 o
   0  -7   6       4806.28       5239.33       208.32 o
   1  -7   6       1679.11       1918.08        83.27 o
   2  -7   6        718.74        797.37        54.88 o
   3  -7   6         67.30        129.65        23.29 o
   4  -7   6         97.59         94.59        31.95 o
   5  -7   6        703.69        599.87        38.70 o
   6  -7   6        680.02        626.92        30.44 o
   7  -7   6        608.15        542.58        43.25 o
   8  -7   6        332.40        386.58        35.11 o
   9  -7   6         74.94         86.80        21.34 o
  -8  -6   6         21.44         34.87        15.23 o
  -7  -6   6         16.91          7.96         9.16 o
  -6  -6   6         66.52         74.11        20.36 o
  -5  -6   6        724.68        709.28        48.23 o
  -4  -6   6       2960.82       2720.76       104.36 o
  -3  -6   6       5401.16       5508.81       291.77 o
  -2  -6   6       4859.16       4688.62       283.67 o
  -1  -6   6       3362.92       3232.77       139.58 o
   0  -6   6        688.59        685.47        31.58 o
   1  -6   6          7.02         14.47         8.19 o
   2  -6   6          7.28         29.79        20.03 o
   3  -6   6        102.83         99.54        17.10 o
   4  -6   6        449.43        486.61        26.98 o
   5  -6   6        945.04        924.36        46.95 o
   6  -6   6        876.48        845.83        42.97 o
   7  -6   6        346.57        387.29        36.96 o
   8  -6   6        100.41        121.22        20.97 o
   9  -6   6         17.55         33.13        19.07 o
  -9  -5   6         24.47         29.08        16.17 o
  -8  -5   6          2.40          2.73         7.52 o
  -7  -5   6         70.68         74.26        28.82 o
  -6  -5   6        638.01        612.62        45.28 o
  -5  -5   6       2914.78       2674.66       117.14 o
  -4  -5   6       5842.52       5594.36       205.56 o
  -3  -5   6       3860.26       3737.27       140.63 o
  -2  -5   6       1559.43       1494.43        55.24 o
  -1  -5   6        327.88        347.99        12.13 o
   0  -5   6        122.77         90.26        12.80 o
   1  -5   6         21.39         25.47        15.80 o
   2  -5   6        278.43        279.72        22.72 o
   3  -5   6       1192.64        958.28       245.86 o
   4  -5   6       2373.69       2179.34       106.31 o
   5  -5   6       2105.95       2078.46        82.85 o
   6  -5   6        938.83       1001.10        52.81 o
   7  -5   6        215.29        241.33        28.11 o
   8  -5   6         42.12         67.46        16.06 o
   9  -5   6         56.17         76.66        24.03 o
  10  -5   6         76.75         72.23        24.21 o
  -9  -4   6         11.85         14.37        20.23 o
  -8  -4   6        200.72        226.69        28.46 o
  -7  -4   6        999.63       1026.61        56.15 o
  -6  -4   6       2662.91       2556.33       157.56 o
  -5  -4   6       3734.11       3671.23       169.07 o
  -4  -4   6       1718.57       1531.79        76.95 o
  -3  -4   6        421.88        437.65        35.01 o
  -2  -4   6         11.79          9.98         2.75 o
  -1  -4   6        748.68        763.90        21.71 o
   0  -4   6        464.66        545.88        25.60 o
   1  -4   6        420.50        468.96        27.78 o
   2  -4   6       3487.72       3469.71       137.65 o
   3  -4   6       5307.28       4693.24       207.33 o
   4  -4   6       3581.46       3410.28       139.45 o
   5  -4   6       2223.58       2274.67       116.18 o
   6  -4   6        341.90        382.22        24.32 o
   7  -4   6         48.50         74.97        13.77 o
   8  -4   6        151.08        163.86        21.49 o
   9  -4   6        184.15        217.34        40.79 o
  10  -4   6        161.78        152.11        31.90 o
 -10  -3   6         21.85         30.18        17.41 o
  -9  -3   6        236.47        242.83        31.22 o
  -8  -3   6        904.09        956.25        94.62 o
  -7  -3   6       1469.72       1436.77        66.73 o
  -6  -3   6       2215.93       2228.66       145.64 o
  -5  -3   6       1033.58       1008.31        42.66 o
  -4  -3   6        171.03        198.54        10.81 o
  -3  -3   6        406.27        382.06        13.51 o
  -2  -3   6        433.65        408.25        21.73 o
  -1  -3   6         46.49         68.42         6.58 o
   0  -3   6       2088.16       2346.49        63.67 o
   1  -3   6       6293.30       6107.10       174.08 o
   2  -3   6       8178.71       7987.76       244.14 o
   3  -3   6       5718.21       5323.33       224.41 o
   4  -3   6       2124.40       2043.75       128.30 o
   5  -3   6        350.94        367.36        19.98 o
   6  -3   6        186.23        184.60        18.94 o
   7  -3   6        196.97        206.78        24.01 o
   8  -3   6        279.98        246.39        39.01 o
   9  -3   6        315.63        369.67        44.48 o
  10  -3   6        163.68        159.69        26.92 o
 -10  -2   6        160.95        155.01        34.26 o
  -9  -2   6        542.85        532.50        74.51 o
  -8  -2   6       1249.35       1217.89        94.10 o
  -7  -2   6        664.25        704.96        83.03 o
  -6  -2   6        644.66        661.47        44.79 o
  -5  -2   6          6.18         11.84         4.87 o
  -4  -2   6        156.63        161.98        10.67 o
  -3  -2   6         15.66         23.06         4.07 o
  -2  -2   6       2014.62       2033.31        64.65 o
  -1  -2   6       6008.47       6771.36       163.65 o
   0  -2   6      12944.06      15248.52       398.67 o
   1  -2   6      10934.63      11303.75       384.34 o
   2  -2   6       6302.99       6006.08       142.53 o
   3  -2   6       1951.77       1867.72        55.54 o
   4  -2   6        382.70        339.26        18.63 o
   5  -2   6        737.24        740.88        28.68 o
   6  -2   6        299.95        313.78        19.49 o
   7  -2   6        415.85        415.41        26.76 o
   8  -2   6        664.06        738.36        68.28 o
   9  -2   6        236.77        263.97        44.39 o
  10  -2   6         86.60         80.13        65.04 o
 -10  -1   6        332.90        367.87        78.38 o
  -9  -1   6        679.70        663.64        89.38 o
  -8  -1   6        872.88        847.99        55.47 o
  -7  -1   6        409.68        376.34        22.34 o
  -6  -1   6        649.38        607.02        29.01 o
  -5  -1   6        105.65         91.82        11.21 o
  -4  -1   6        114.78        128.32         8.29 o
  -3  -1   6       2541.68       2447.93        58.41 o
  -2  -1   6       9413.63      10881.71       439.86 o
  -1  -1   6      11578.77      12787.31       374.04 o
   0  -1   6      15387.45      17495.87       485.83 o
   1  -1   6       5075.30       5227.80       149.87 o
   2  -1   6        876.21        813.28        18.24 o
   3  -1   6         22.75         31.44         7.10 o
   4  -1   6         35.03         31.40         5.22 o
   5  -1   6          9.92         12.94         5.94 o
   6  -1   6        302.21        303.67        22.69 o
   7  -1   6        683.62        720.30        45.80 o
   8  -1   6        472.81        492.34        32.54 o
   9  -1   6        143.43        144.46       102.94 o
 -10   0   6        306.24        306.98        34.64 o
  -9   0   6        312.99        335.47        27.90 o
  -8   0   6         95.37         71.74        11.43 o
  -7   0   6         48.60         41.43        10.15 o
  -6   0   6         34.31         39.10         6.98 o
  -5   0   6        273.09        251.98        13.53 o
  -4   0   6       5323.31       5296.25       135.46 o
  -3   0   6       8794.38       9331.33       256.38 o
  -2   0   6      10717.09      11322.96       280.55 o
  -1   0   6       7752.56       8386.67       219.51 o
   0   0   6       2255.61       2288.38        69.67 o
   1   0   6         11.86         17.35         3.01 o
   2   0   6         41.54         37.21         2.97 o
   3   0   6         86.48         86.04         7.08 o
   4   0   6         52.88         62.09         8.95 o
   5   0   6        616.14        602.18        36.04 o
   6   0   6        667.09        677.13        34.98 o
   7   0   6        585.13        590.88        35.77 o
   8   0   6        229.31        296.83        52.26 o
   9   0   6         22.30          0.04         3.69 o
 -11   1   6        141.11        167.89        63.97 o
 -10   1   6        186.68        200.59        55.75 o
  -9   1   6         21.38         21.16         8.42 o
  -8   1   6          4.85          6.58         5.30 o
  -7   1   6         69.16         72.63        10.21 o
  -6   1   6       1344.53       1270.15        37.55 o
  -5   1   6       2608.42       2593.32        66.40 o
  -4   1   6       7192.20       7128.94       192.57 o
  -3   1   6       7631.33       7557.32       178.18 o
  -2   1   6       3575.39       3937.77        76.62 o
  -1   1   6        227.78        233.81         6.05 o
   0   1   6          1.74          3.42         1.55 o
   1   1   6        387.32        319.68        11.12 o
   2   1   6         94.11        107.09         4.37 o
   3   1   6        443.32        451.23        15.28 o
   4   1   6       1857.46       1796.20        51.23 o
   5   1   6       1774.35       1735.82        61.68 o
   6   1   6        952.49        985.91        53.53 o
   7   1   6        311.68        363.55        25.67 o
   8   1   6         59.95         54.23        46.45 o
   9   1   6         25.60          0.10         3.20 o
 -10   2   6         74.53         95.17        16.89 o
  -9   2   6         34.40         50.42        11.53 o
  -8   2   6        145.01        151.35        16.96 o
  -7   2   6        752.54        788.48        31.00 o
  -6   2   6       2367.00       2271.88        70.53 o
  -5   2   6       3050.87       2907.73        72.95 o
  -4   2   6       4584.81       4384.11       110.37 o
  -3   2   6       1749.25       1855.84        68.26 o
  -2   2   6        168.39        188.20         4.95 o
  -1   2   6         35.99         35.99         4.49 o
   0   2   6        273.72        217.61        14.61 o
   1   2   6         64.01         61.99         4.59 o
   2   2   6       1324.38       1173.53        63.83 o
   3   2   6       3365.91       3025.54        78.15 o
   4   2   6       2832.17       2693.06        89.96 o
   5   2   6       1208.45       1169.77        89.51 o
   6   2   6        404.05        431.59        40.71 o
   7   2   6        128.82        144.48        16.20 o
   8   2   6         19.59         13.94        10.38 o
   9   2   6         39.72         22.97        21.62 o
 -10   3   6         24.05         31.07        10.70 o
  -9   3   6         64.55         76.16        14.77 o
  -8   3   6        468.95        529.03        37.95 o
  -7   3   6       1115.06        981.02        45.70 o
  -6   3   6       1398.08       1351.00        40.66 o
  -5   3   6       1613.76       1417.60        61.01 o
  -4   3   6        367.01        356.42        18.56 o
  -3   3   6         12.89         10.77         1.73 o
  -2   3   6        463.16        484.26        21.08 o
  -1   3   6         32.44         45.22        12.09 o
   0   3   6        759.42        752.54        39.30 o
   1   3   6       2940.94       2944.03       131.74 o
   2   3   6       4385.72       4125.57        89.37 o
   3   3   6       4719.23       4242.92       160.23 o
   4   3   6       1588.95       1416.55        68.00 o
   5   3   6        578.40        551.80        22.72 o
   6   3   6        143.11        135.10        12.09 o
   7   3   6         25.90         10.39        13.75 o
   8   3   6         43.90         44.12        11.40 o
 -10   4   6         74.87         75.56        13.34 o
  -9   4   6        249.34        259.78        24.85 o
  -8   4   6        809.40        719.98        38.75 o
  -7   4   6       1045.18       1041.67        43.45 o
  -6   4   6        909.33        782.50        31.35 o
  -5   4   6         93.48        108.05         9.39 o
  -4   4   6         49.20         50.12         5.65 o
  -3   4   6         14.49         25.42         1.64 o
  -2   4   6         45.14         66.69         9.49 o
  -1   4   6       1924.86       1919.34       117.66 o
   0   4   6       4843.56       4885.08       233.01 o
   1   4   6       5889.67       6271.82       366.98 o
   2   4   6       2953.23       2850.50        55.66 o
   3   4   6       1536.89       1486.72        55.54 o
   4   4   6        185.34        196.41         9.05 o
   5   4   6         25.54          9.86         8.67 o
   6   4   6         22.06         11.61         8.94 o
   7   4   6         64.24         31.83        23.49 o
   8   4   6         66.03         65.15        18.99 o
 -10   5   6        103.05        107.71        15.39 o
  -9   5   6        360.20        328.67        21.18 o
  -8   5   6        607.86        592.35        27.87 o
  -7   5   6        243.40        209.06        13.65 o
  -6   5   6         26.65         30.30         4.58 o
  -5   5   6          2.59          4.39         2.96 o
  -4   5   6          9.50          9.00         2.43 o
  -3   5   6        512.67        565.09        19.99 o
  -2   5   6       1967.44       2052.26        87.04 o
  -1   5   6       4967.25       5102.65       254.41 o
   0   5   6       3396.86       3627.15       181.87 o
   1   5   6       1660.46       1725.15        92.58 o
   2   5   6        768.17        883.38        59.15 o
   3   5   6         87.81         80.32         4.77 o
   4   5   6         45.27         27.10        12.57 o
   5   5   6          9.38          3.43         3.11 o
   6   5   6         54.25         20.98        17.44 o
   7   5   6         89.44         69.61        16.19 o
  -9   6   6        213.94        217.97        15.85 o
  -8   6   6        189.27        179.09        14.17 o
  -7   6   6         26.23         35.03         6.46 o
  -6   6   6         50.67         51.76         5.96 o
  -5   6   6        109.90        126.75         7.71 o
  -4   6   6        577.70        601.21        27.65 o
  -3   6   6       1722.74       1808.75        70.31 o
  -2   6   6       2111.34       2191.78       113.83 o
  -1   6   6       2076.56       2226.66       156.92 o
   0   6   6       1090.28       1152.63        69.43 o
   1   6   6        240.51        287.39        32.91 o
   2   6   6         15.79         27.37        23.42 o
   3   6   6         21.54         22.36         3.63 o
   4   6   6          1.15          3.40         2.05 o
   5   6   6         93.01         83.28         7.58 o
  -9   7   6        100.68         96.64        19.91 o
  -8   7   6         42.86         56.27        12.42 o
  -7   7   6         19.49         23.42         6.25 o
  -6   7   6        201.47        229.75        16.90 o
  -5   7   6        632.70        646.71        40.11 o
  -4   7   6       1650.61       1508.47        84.47 o
  -3   7   6       1925.91       2169.06       109.50 o
  -2   7   6       1472.26       1552.13        91.44 o
  -1   7   6        606.61        599.11        48.54 o
   0   7   6          4.41          1.05         6.40 o
   1   7   6         67.08         86.00        21.31 o
   2   7   6          3.32          2.68         8.66 o
   3   7   6         13.05         23.69        15.91 o
   4   7   6        181.61        181.07        34.63 o
   5   7   6        374.62        437.23        58.59 o
  -8   8   6         52.14         56.65         8.90 o
  -7   8   6        100.31        105.87        11.27 o
  -6   8   6        439.99        396.88        57.49 o
  -5   8   6        779.78        836.15        56.81 o
  -4   8   6        753.41        804.29        49.89 o
  -3   8   6        445.74        461.58        43.08 o
  -2   8   6        154.70        153.30        25.14 o
  -1   8   6          9.30          3.33         8.37 o
   0   8   6         38.90         59.06        19.68 o
   1   8   6          1.01          7.22        18.37 o
   2   8   6         95.31         98.25        26.38 o
   3   8   6        337.26        325.60        48.05 o
   4   8   6        385.06        431.45        59.60 o
  -7   9   6        134.51        118.95        28.89 o
  -6   9   6        322.98        316.10        42.52 o
  -5   9   6        311.31        394.58        55.66 o
  -4   9   6        202.31        226.51        53.91 o
  -3   9   6         27.50         33.25        26.10 o
  -2   9   6          3.08          6.55        16.56 o
  -1   9   6          3.61          9.47        19.08 o
   0   9   6         38.42         63.07        21.32 o
   1   9   6        295.86        328.14        44.94 o
   2   9   6        392.28        384.59        54.10 o
  -5  10   6         85.15         71.07        43.69 o
  -4  10   6          3.51          8.96        20.62 o
  -3  10   6          1.95          0.52        10.87 o
  -2  10   6         26.85         19.50        14.42 o
  -1  10   6         88.83         91.79        25.70 o
   0  10   6        303.55        332.35        73.82 o
   0 -12   7         45.62          7.55        17.59 o
   1 -12   7          0.96         -3.41         8.82 o
   2 -12   7         10.11          0.39         6.18 o
   3 -12   7         36.88         25.57        20.98 o
  -3 -11   7        440.49        402.16       100.17 o
  -2 -11   7        176.36        141.34        43.49 o
  -1 -11   7         17.52         17.97        15.22 o
   0 -11   7          1.74          0.98         6.39 o
   1 -11   7          6.82          2.58         7.75 o
   2 -11   7        136.63        147.11        25.16 o
   3 -11   7        564.85        656.10        52.15 o
   4 -11   7       1073.89       1123.83       103.16 o
   5 -11   7        909.46       1043.13       104.68 o
  -4 -10   7        335.93        334.96        55.00 o
  -3 -10   7        117.59         92.38        30.49 o
  -2 -10   7          3.28         11.05        10.27 o
  -1 -10   7          5.73          4.94         8.19 o
   0 -10   7        111.29         75.94        62.72 o
   1 -10   7        644.03        690.91        47.85 o
   2 -10   7       1590.16       1678.82        85.24 o
   3 -10   7       1757.51       2002.23       101.21 o
   4 -10   7       1423.70       1539.98       119.84 o
   5 -10   7        582.27        631.59        68.11 o
   6 -10   7         94.11        102.78        31.90 o
   7 -10   7         18.71         20.62        20.22 o
  -6  -9   7        318.62        233.70        86.13 o
  -5  -9   7        252.69        247.58        77.33 o
  -4  -9   7         55.27         66.89        43.67 o
  -3  -9   7         46.13         51.23        37.15 o
  -2  -9   7        166.00        135.66        19.21 o
  -1  -9   7        292.75        319.80        35.48 o
   0  -9   7       1356.89       1433.28        82.19 o
   1  -9   7       2660.08       2868.18       139.77 o
   2  -9   7       2666.83       2923.28       131.16 o
   3  -9   7       1653.18       1879.45       126.32 o
   4  -9   7        555.17        661.07        65.73 o
   5  -9   7         22.56          7.51        12.37 o
   6  -9   7          1.49          2.04         9.84 o
   7  -9   7          5.21          1.93         7.11 o
  -7  -8   7        274.29        264.01        41.80 o
  -6  -8   7        273.80        214.47        34.54 o
  -5  -8   7        132.67        103.25        49.19 o
  -4  -8   7        123.26        154.57        53.79 o
  -3  -8   7         54.61         68.44        22.45 o
  -2  -8   7        201.77        189.62        19.58 o
  -1  -8   7       1152.52       1099.30        54.86 o
   0  -8   7       3435.47       3716.81       149.20 o
   1  -8   7       2852.65       3006.60       120.58 o
   2  -8   7       1512.69       1789.10        91.30 o
   3  -8   7        340.60        382.50        43.96 o
   4  -8   7          2.42          9.00        11.15 o
   5  -8   7         60.89         23.75        15.55 o
   6  -8   7         10.93          5.59         9.50 o
   7  -8   7        156.92        125.48        80.15 o
   8  -8   7        283.64        330.70        45.51 o
  -7  -7   7        201.91         71.35        86.57 o
  -6  -7   7        201.05         23.74        26.00 o
  -5  -7   7        105.02         63.53        62.74 o
  -4  -7   7        217.63        222.44        34.66 o
  -3  -7   7       1548.09       1476.33        97.54 o
  -2  -7   7       3540.97       3046.54       162.56 o
  -1  -7   7       3564.22       3778.56       102.87 o
   0  -7   7       3614.92       3994.42       166.28 o
   1  -7   7        577.01        652.52        36.14 o
   2  -7   7         27.37         27.04        23.09 o
   3  -7   7         28.51         35.30        14.15 o
   4  -7   7          6.14          6.16        14.94 o
   5  -7   7        152.10        127.23        16.86 o
   6  -7   7        621.81        557.94        33.67 o
   7  -7   7        662.91        700.30        46.68 o
   8  -7   7        616.76        661.43        50.45 o
   9  -7   7        241.76        284.51        39.14 o
  -8  -6   7        276.84        228.16        39.30 o
  -7  -6   7        236.41        246.75        29.64 o
  -6  -6   7        239.43        277.58        34.85 o
  -5  -6   7        328.85        317.10        45.00 o
  -4  -6   7       1672.69       1415.64       123.90 o
  -3  -6   7       2756.15       2437.05       157.76 o
  -2  -6   7       3404.35       3279.01       148.04 o
  -1  -6   7       2119.34       2216.80        58.15 o
   0  -6   7        780.87        846.19        38.42 o
   1  -6   7         61.35         79.09        15.03 o
   2  -6   7         41.77         42.66        14.50 o
   3  -6   7          6.79          8.83        14.41 o
   4  -6   7        370.26        359.29        33.47 o
   5  -6   7       1100.35       1124.18        68.75 o
   6  -6   7       1906.05       1932.21        89.48 o
   7  -6   7       1193.46       1250.70        64.41 o
   8  -6   7        405.96        506.17        40.71 o
   9  -6   7         72.36         85.68        35.24 o
  -9  -5   7        215.83        195.15        55.03 o
  -8  -5   7        161.38        184.18        27.60 o
  -7  -5   7         71.95         96.55        24.09 o
  -6  -5   7        331.39        288.20        34.44 o
  -5  -5   7        918.80        902.37        54.43 o
  -4  -5   7       2104.58       1840.48       113.25 o
  -3  -5   7       2491.38       2389.38       111.99 o
  -2  -5   7        785.32        767.59        29.30 o
  -1  -5   7        156.55        175.10         8.19 o
   0  -5   7         15.40         35.14         9.84 o
   1  -5   7        222.22        177.55        15.17 o
   2  -5   7        201.40        183.49        20.43 o
   3  -5   7       1108.74       1017.83        47.83 o
   4  -5   7       2043.42       1972.93        73.18 o
   5  -5   7       2878.51       2799.06       102.07 o
   6  -5   7       1581.87       1650.05        78.69 o
   7  -5   7        426.47        454.26        32.56 o
   8  -5   7         63.18         64.91        16.28 o
   9  -5   7          7.95          4.07        13.66 o
  -9  -4   7         26.83         50.61        24.19 o
  -8  -4   7         16.07         22.54        14.47 o
  -7  -4   7        216.08        187.88        38.93 o
  -6  -4   7        592.93        602.51        56.14 o
  -5  -4   7       1135.19        986.59        67.80 o
  -4  -4   7       1620.55       1477.55        40.97 o
  -3  -4   7        685.99        629.87        28.91 o
  -2  -4   7        542.82        626.86        30.88 o
  -1  -4   7         98.22        134.42        10.12 o
   0  -4   7        120.78        173.19        27.60 o
   1  -4   7        881.73        822.28        99.91 o
   2  -4   7       3661.68       3386.31       175.85 o
   3  -4   7       4904.86       4782.82       220.29 o
   4  -4   7       5029.27       4933.97       208.44 o
   5  -4   7       2250.68       2183.29       103.62 o
   6  -4   7        534.60        538.16        29.97 o
   7  -4   7         14.55         22.42         9.45 o
   8  -4   7          2.62         -0.72         5.22 o
   9  -4   7         10.30         13.86        13.92 o
  -9  -3   7         34.73         37.80        20.12 o
  -8  -3   7        114.62        105.31        19.94 o
  -7  -3   7        456.56        493.42        40.75 o
  -6  -3   7        786.09        669.50        32.34 o
  -5  -3   7       1172.12       1121.81        38.03 o
  -4  -3   7        548.60        573.93        22.39 o
  -3  -3   7         80.68        106.15         7.11 o
  -2  -3   7         14.22         23.10         5.94 o
  -1  -3   7        500.18        509.71        19.79 o
   0  -3   7       2504.72       2438.05        56.06 o
   1  -3   7       5633.84       5406.66       307.61 o
   2  -3   7       8700.88       8980.78       301.18 o
   3  -3   7       5622.56       5331.33       136.73 o
   4  -3   7       1021.09        932.35        39.48 o
   5  -3   7         81.90         87.79        10.54 o
   6  -3   7         15.14         27.94        10.56 o
   7  -3   7          6.27          6.39         7.58 o
   8  -3   7         14.44         21.61        10.28 o
   9  -3   7        120.00        131.72        37.65 o
 -10  -2   7          3.86          7.99         8.11 o
  -9  -2   7         62.68         63.44        15.82 o
  -8  -2   7        284.06        315.51        22.16 o
  -7  -2   7        531.96        455.25        30.35 o
  -6  -2   7        611.32        586.55        35.96 o
  -5  -2   7       1053.09       1044.38        46.16 o
  -4  -2   7        277.53        278.16        12.38 o
  -3  -2   7        266.20        258.86        13.86 o
  -2  -2   7       1766.13       1935.93        54.22 o
  -1  -2   7       3039.34       2947.82        86.31 o
   0  -2   7       6886.78       7269.28       190.82 o
   1  -2   7       8658.23       8919.64       297.64 o
   2  -2   7       4508.90       4329.55       136.33 o
   3  -2   7       1061.78       1003.96        26.31 o
   4  -2   7         64.55         87.78        10.52 o
   5  -2   7          3.52          2.27         4.11 o
   6  -2   7         10.81          6.56         6.54 o
   7  -2   7         15.39         22.28         8.59 o
   8  -2   7        219.45        224.56        23.70 o
   9  -2   7        352.12        376.32        38.68 o
 -10  -1   7         58.05         61.35        16.40 o
  -9  -1   7        334.47        350.18        33.87 o
  -8  -1   7        631.46        573.97        32.79 o
  -7  -1   7        993.37       1042.63        42.59 o
  -6  -1   7       1095.84       1051.40        34.56 o
  -5  -1   7        703.24        686.88        30.47 o
  -4  -1   7        487.31        486.45        18.11 o
  -3  -1   7       1846.94       1844.43        71.81 o
  -2  -1   7       3962.00       4169.77       155.88 o
  -1  -1   7       5568.32       6295.11       166.62 o
   0  -1   7       5591.59       5791.14       142.04 o
   1  -1   7       2742.36       2704.63       105.51 o
   2  -1   7        526.46        539.11        19.52 o
   3  -1   7         67.49         84.07         6.93 o
   4  -1   7          7.40          5.83         5.69 o
   5  -1   7         65.23         85.75         9.31 o
   6  -1   7        290.96        307.31        23.59 o
   7  -1   7        624.44        641.09        36.09 o
   8  -1   7        605.82        704.96        50.47 o
   9  -1   7        322.31        376.05        53.05 o
 -10   0   7        319.30        295.39        30.71 o
  -9   0   7        942.50        945.13        62.65 o
  -8   0   7       1307.01       1293.65        93.73 o
  -7   0   7        427.77        390.94        20.52 o
  -6   0   7        364.53        393.93        23.66 o
  -5   0   7        680.01        674.33        28.32 o
  -4   0   7        699.36        703.97        29.14 o
  -3   0   7       3424.98       3542.18        88.35 o
  -2   0   7       5418.87       6197.14       163.77 o
  -1   0   7       2755.39       2916.38        56.51 o
   0   0   7       1095.93       1215.35        30.43 o
   1   0   7          6.48         12.94         4.83 o
   2   0   7        191.62        183.15         8.84 o
   3   0   7        114.94        105.59         6.27 o
   4   0   7         16.11         21.32         7.31 o
   5   0   7        842.59        854.42        30.78 o
   6   0   7       1256.92       1316.06        67.95 o
   7   0   7       1022.90       1141.63        50.96 o
   8   0   7        502.34        559.45        53.34 o
   9   0   7         90.07         28.47        27.48 o
 -10   1   7        319.63        359.60        40.16 o
  -9   1   7        388.44        407.56        34.08 o
  -8   1   7        170.42        178.55        15.95 o
  -7   1   7        143.01        184.20        17.03 o
  -6   1   7        573.62        468.50        20.71 o
  -5   1   7        344.38        361.65        16.72 o
  -4   1   7       1368.67       1343.93        40.10 o
  -3   1   7       1821.09       1787.59        38.71 o
  -2   1   7        860.54        888.94        21.29 o
  -1   1   7        139.32        142.53         6.16 o
   0   1   7         59.18         72.59         3.60 o
   1   1   7         10.89         11.90         3.85 o
   2   1   7          5.48          7.50         1.76 o
   3   1   7        354.81        328.61        12.13 o
   4   1   7       1707.89       1627.60        52.15 o
   5   1   7       2245.41       2201.66        70.95 o
   6   1   7       1277.05       1378.39        51.30 o
   7   1   7        561.67        513.19        41.68 o
   8   1   7        106.54        111.96        14.30 o
 -10   2   7        166.89        182.52        19.64 o
  -9   2   7        140.97        153.72        35.32 o
  -8   2   7         74.23         85.07        11.03 o
  -7   2   7         92.34         72.08        12.14 o
  -6   2   7        492.20        525.20        21.34 o
  -5   2   7        774.92        675.25        20.18 o
  -4   2   7        988.66        945.41        58.60 o
  -3   2   7       1206.43       1237.18        39.89 o
  -2   2   7        455.37        412.67        28.98 o
  -1   2   7         16.47         27.31         2.30 o
   0   2   7         57.12         45.58         6.24 o
   1   2   7        140.50        123.98         4.61 o
   2   2   7       1418.61       1293.92       118.07 o
   3   2   7       2632.09       2501.94        56.56 o
   4   2   7       2488.36       2477.24        69.92 o
   5   2   7       1261.18       1199.24        37.01 o
   6   2   7        376.10        367.20        21.79 o
   7   2   7         72.72         49.56        39.68 o
   8   2   7          4.97         -5.68         6.72 o
 -10   3   7         39.32         55.40        12.58 o
  -9   3   7         14.50         14.89         6.72 o
  -8   3   7         18.22         12.05         7.25 o
  -7   3   7        163.50        182.24        15.84 o
  -6   3   7        576.60        484.82        22.92 o
  -5   3   7        790.46        810.90        47.23 o
  -4   3   7       1455.88       1392.65        51.34 o
  -3   3   7        577.21        524.92        25.91 o
  -2   3   7        357.58        414.86         9.11 o
  -1   3   7        268.88        219.70        22.24 o
   0   3   7        955.85        932.40        51.21 o
   1   3   7       2169.86       2218.41       107.15 o
   2   3   7       2937.26       2757.95       120.93 o
   3   3   7       2210.91       2200.82       108.37 o
   4   3   7       1149.87       1089.01        54.30 o
   5   3   7        190.67        188.63        12.38 o
   6   3   7          4.52         -0.35         2.37 o
   7   3   7          0.47         -0.20         3.36 o
 -10   4   7          2.31          0.55         4.17 o
  -9   4   7          9.61          8.92         7.76 o
  -8   4   7         62.58         59.46        10.01 o
  -7   4   7        553.79        460.40        18.54 o
  -6   4   7        863.80        882.62        42.95 o
  -5   4   7        823.98        750.21        23.47 o
  -4   4   7        582.56        605.64        13.49 o
  -3   4   7        431.22        460.22        25.26 o
  -2   4   7        382.11        327.17        26.75 o
  -1   4   7        870.87        948.86        56.97 o
   0   4   7       2979.17       3063.99       195.75 o
   1   4   7       2793.51       2912.81       191.20 o
   2   4   7       1701.66       1886.65       140.50 o
   3   4   7        787.71        711.82        18.77 o
   4   4   7        126.37        113.24         5.50 o
   5   4   7         11.14          4.00         3.47 o
   6   4   7          3.63          4.40         4.08 o
   7   4   7          4.40          2.77         3.56 o
  -9   5   7        128.99        112.47        12.19 o
  -8   5   7        439.41        405.15        22.21 o
  -7   5   7        674.60        696.36        39.32 o
  -6   5   7        465.81        496.29        17.97 o
  -5   5   7        591.07        648.29        27.90 o
  -4   5   7        411.99        416.82         8.42 o
  -3   5   7        593.15        579.86        37.75 o
  -2   5   7       1478.18       1721.28        79.28 o
  -1   5   7       1830.18       1981.68       108.70 o
   0   5   7       1471.68       1519.43        87.53 o
   1   5   7        682.61        768.56        54.57 o
   2   5   7        257.69        220.03        30.12 o
   3   5   7         33.30         30.54         1.99 o
   4   5   7         14.27          7.97         7.55 o
   5   5   7          1.81          1.45         3.59 o
  -9   6   7        262.81        266.21        23.03 o
  -8   6   7        339.77        351.84        24.41 o
  -7   6   7        386.16        404.49        31.45 o
  -6   6   7        191.03        227.82        14.24 o
  -5   6   7        154.10        163.29         7.39 o
  -4   6   7        214.14        236.08        36.32 o
  -3   6   7        464.11        514.80        51.79 o
  -2   6   7        439.78        444.89        40.69 o
  -1   6   7        598.98        632.55        51.78 o
   0   6   7        570.19        680.26        54.07 o
   1   6   7        103.78         97.50        22.57 o
   2   6   7          1.54          4.58        16.11 o
   3   6   7          0.73         -1.38         8.07 o
   4   6   7          2.91          2.54         9.36 o
   5   6   7         58.25         59.76        25.28 o
  -8   7   7        183.25        216.79        19.56 o
  -7   7   7         85.47         92.67        18.80 o
  -6   7   7         23.69         36.35        17.52 o
  -5   7   7         89.55         93.31        21.07 o
  -4   7   7        104.71        133.97        24.29 o
  -3   7   7        266.74        249.00        33.51 o
  -2   7   7        371.87        399.42        41.39 o
  -1   7   7        261.51        278.69        37.13 o
   0   7   7         60.24         51.32        33.19 o
   1   7   7          1.69          4.65        10.08 o
   2   7   7         11.50          4.24        10.56 o
   3   7   7         59.39         58.09        23.69 o
   4   7   7        136.04        173.46        39.54 o
  -7   8   7         25.85         31.92        18.58 o
  -6   8   7         55.98         42.04        20.31 o
  -5   8   7        136.04        147.99        28.47 o
  -4   8   7        238.35        252.04        27.45 o
  -3   8   7        239.97        236.78        56.40 o
  -2   8   7        168.89        191.60        51.61 o
  -1   8   7        100.20         97.57        41.75 o
   0   8   7         17.70         37.72        18.62 o
   1   8   7         43.85         43.90        20.72 o
   2   8   7        173.08        256.89        42.99 o
   3   8   7        291.06        322.74        52.98 o
  -5   9   7        161.07        168.88        27.70 o
  -4   9   7        215.82        289.19        69.37 o
  -3   9   7        141.63        120.44        46.17 o
  -2   9   7         84.60         82.93        25.09 o
  -1   9   7         43.65         56.68        22.70 o
   0   9   7         95.43        106.74        49.49 o
   1   9   7        183.31        253.49        44.36 o
  -2 -11   8        421.93        410.61        53.56 o
  -1 -11   8        330.46        327.18        63.53 o
   0 -11   8        208.24        245.72        46.60 o
   1 -11   8         98.25         51.23        42.59 o
   2 -11   8        121.16        135.62        31.92 o
   3 -11   8        225.49        237.19        42.07 o
   4 -11   8        417.50        478.58        49.48 o
  -4 -10   8        426.45        383.92        63.00 o
  -3 -10   8        578.05        572.13        70.88 o
  -2 -10   8        336.64        334.16        37.16 o
  -1 -10   8        214.22        243.67        31.39 o
   0 -10   8        196.70        216.49        34.95 o
   1 -10   8        263.60        320.29        35.23 o
   2 -10   8        765.29        828.21        57.98 o
   3 -10   8        978.78       1137.08        86.15 o
   4 -10   8        853.14        915.31        92.20 o
   5 -10   8        527.46        513.62        65.05 o
   6 -10   8        121.35        185.00        42.01 o
  -5  -9   8        566.43        539.16       113.61 o
  -4  -9   8        665.53        608.83       112.91 o
  -3  -9   8        839.85        743.40       120.67 o
  -2  -9   8        838.81        591.25       426.16 o
  -1  -9   8        489.51        446.78        38.02 o
   0  -9   8        435.44        497.81        40.50 o
   1  -9   8        873.64        932.25        57.34 o
   2  -9   8        991.76       1128.14        65.82 o
   3  -9   8        837.57        926.11        83.55 o
   4  -9   8        623.01        579.81        60.14 o
   5  -9   8        153.40        164.93        35.50 o
   6  -9   8         13.54          3.57        11.81 o
   7  -9   8          5.18          1.03        10.11 o
  -6  -8   8        660.92        653.41        80.55 o
  -5  -8   8        905.16        816.24        83.82 o
  -4  -8   8        754.56        616.22        78.76 o
  -3  -8   8        408.39        347.34        43.78 o
  -2  -8   8        128.58        106.93        17.83 o
  -1  -8   8        393.39        389.14        38.80 o
   0  -8   8        916.02        954.99        82.05 o
   1  -8   8       1255.75       1401.32       100.84 o
   2  -8   8       1022.10       1044.86        67.56 o
   3  -8   8        413.70        480.46        53.72 o
   4  -8   8         67.68         96.22        25.37 o
   5  -8   8          3.48         13.46        14.34 o
   6  -8   8          9.90         -0.02         9.79 o
   7  -8   8         79.89         66.58        48.46 o
  -7  -7   8        671.52        623.64        55.42 o
  -6  -7   8        606.25        598.53        58.06 o
  -5  -7   8        307.91        241.03        23.73 o
  -4  -7   8         15.91         17.23         7.02 o
  -3  -7   8         20.03         13.77         6.95 o
  -2  -7   8        251.86        230.63        12.50 o
  -1  -7   8        357.90        353.50        33.53 o
   0  -7   8       1003.30       1099.14        54.13 o
   1  -7   8       1170.15       1179.56        64.79 o
   2  -7   8        230.42        304.92        36.87 o
   3  -7   8         76.54         81.60        20.79 o
   4  -7   8         51.17         45.33        29.14 o
   5  -7   8         42.13         55.85        19.78 o
   6  -7   8        245.84        289.46        28.13 o
   7  -7   8        417.44        473.66        38.72 o
   8  -7   8        465.50        519.01        45.50 o
  -8  -6   8        462.28        467.84        47.26 o
  -7  -6   8        405.18        356.30        43.77 o
  -6  -6   8        198.88        116.01        41.35 o
  -5  -6   8         48.20         43.23        11.48 o
  -4  -6   8         31.82         24.62         5.65 o
  -3  -6   8        300.07        298.64        23.20 o
  -2  -6   8        555.25        550.05        22.75 o
  -1  -6   8       1040.69       1071.48        30.89 o
   0  -6   8       1309.15       1452.66        69.69 o
   1  -6   8        744.89        899.59        50.89 o
   2  -6   8        351.67        367.55        37.55 o
   3  -6   8        477.61        505.36        63.71 o
   4  -6   8        487.05        517.14        44.05 o
   5  -6   8        689.30        627.09        48.03 o
   6  -6   8        960.30        950.80        55.97 o
   7  -6   8        876.20        886.00        53.39 o
   8  -6   8        359.67        388.70        37.86 o
  -8  -5   8        312.75        305.65        43.48 o
  -7  -5   8         45.86         31.99         9.12 o
  -6  -5   8          4.79         11.42         8.07 o
  -5  -5   8         17.94         14.96         7.77 o
  -4  -5   8        174.59        177.55        11.18 o
  -3  -5   8        795.74        747.20        31.84 o
  -2  -5   8       1349.93       1394.02        50.15 o
  -1  -5   8       1173.88       1321.68        39.89 o
   0  -5   8       1749.48       1861.85        68.07 o
   1  -5   8        639.69        668.94        38.40 o
   2  -5   8        478.07        505.01        56.74 o
   3  -5   8       1111.77       1084.05        53.74 o
   4  -5   8       1218.17       1162.32        99.62 o
   5  -5   8       1365.83       1169.21        79.83 o
   6  -5   8       1351.08       1348.84        70.78 o
   7  -5   8        452.42        485.36        35.17 o
   8  -5   8        111.50        128.19        20.97 o
  -9  -4   8         58.72         25.40        17.64 o
  -8  -4   8         13.86         10.02         6.54 o
  -7  -4   8          1.07          0.83         6.42 o
  -6  -4   8         67.58         49.22         9.99 o
  -5  -4   8        294.43        280.77        18.98 o
  -4  -4   8       1218.49       1060.11        31.75 o
  -3  -4   8       2805.29       2861.21       106.16 o
  -2  -4   8       2819.47       3084.08        98.99 o
  -1  -4   8       1986.51       2151.78        65.55 o
   0  -4   8       1117.35       1124.38        41.37 o
   1  -4   8        654.54        726.15        19.90 o
   2  -4   8        895.99        868.13        34.06 o
   3  -4   8       1513.48       1420.22        72.53 o
   4  -4   8       1789.17       1594.45        51.41 o
   5  -4   8       1244.94       1253.08        71.32 o
   6  -4   8        397.78        378.55        26.11 o
   7  -4   8         76.32         72.39        14.28 o
   8  -4   8          2.58          4.80         9.60 o
   9  -4   8          2.37          3.08         7.82 o
  -9  -3   8          1.22          0.71         5.36 o
  -8  -3   8          8.76          4.80         5.62 o
  -7  -3   8         52.84         36.37        10.67 o
  -6  -3   8        573.43        588.34        35.02 o
  -5  -3   8       1838.91       1744.22        71.98 o
  -4  -3   8       3856.67       3766.21       108.08 o
  -3  -3   8       3846.67       3934.20       125.71 o
  -2  -3   8       1906.51       2044.57        67.54 o
  -1  -3   8       1230.29       1250.39        36.42 o
   0  -3   8        950.58       1089.20        31.33 o
   1  -3   8        542.87        580.71        18.21 o
   2  -3   8       1866.97       1749.25        72.44 o
   3  -3   8       2202.14       2128.73       117.51 o
   4  -3   8        871.79        831.13        33.03 o
   5  -3   8        244.51        217.08        20.19 o
   6  -3   8         76.99         81.55        12.34 o
   7  -3   8          1.18          5.94         7.27 o
   8  -3   8          2.54         -3.21         8.58 o
   9  -3   8         38.91         69.57        18.16 o
  -9  -2   8         11.44         11.36         7.80 o
  -8  -2   8        136.96        136.67        15.81 o
  -7  -2   8        684.20        706.54        35.81 o
  -6  -2   8       1375.02       1292.95        55.49 o
  -5  -2   8       2603.09       2696.22        99.59 o
  -4  -2   8       2268.69       2104.23        98.77 o
  -3  -2   8        989.83        927.25        35.82 o
  -2  -2   8        745.95        771.25        30.58 o
  -1  -2   8        626.03        715.60        17.23 o
   0  -2   8        463.96        467.75        14.55 o
   1  -2   8       1022.56       1025.64        31.16 o
   2  -2   8        590.18        630.64        26.20 o
   3  -2   8        181.03        189.54        11.57 o
   4  -2   8         98.69         94.09         9.44 o
   5  -2   8         17.83         26.04         8.59 o
   6  -2   8         17.05         29.47         8.16 o
   7  -2   8         46.58         70.41        16.07 o
   8  -2   8        110.81        140.40        21.06 o
 -10  -1   8          1.49          5.49        10.05 o
  -9  -1   8         51.02         69.54        14.65 o
  -8  -1   8        444.55        465.59        27.25 o
  -7  -1   8       1569.11       1467.29        88.59 o
  -6  -1   8       1840.26       1907.95        62.64 o
  -5  -1   8       1831.16       1702.00        83.72 o
  -4  -1   8        410.07        421.22        18.61 o
  -3  -1   8        171.61        172.70        11.06 o
  -2  -1   8         29.02         41.22         6.26 o
  -1  -1   8        491.84        509.37        14.31 o
   0  -1   8        997.64       1058.75        33.03 o
   1  -1   8       1375.76       1495.34        43.05 o
   2  -1   8       1296.69       1255.15        39.69 o
   3  -1   8        545.92        500.37        16.12 o
   4  -1   8         78.15         80.86         8.47 o
   5  -1   8         50.81         67.09         8.62 o
   6  -1   8        162.05        190.00        19.52 o
   7  -1   8        253.65        315.16        30.26 o
   8  -1   8        355.79        382.39        29.85 o
 -10   0   8        117.29        185.06        28.00 o
  -9   0   8        636.81        598.94        42.78 o
  -8   0   8       1246.42       1250.65        60.52 o
  -7   0   8       1156.26       1216.33        44.12 o
  -6   0   8        327.09        267.86        16.68 o
  -5   0   8        407.90        488.94        27.75 o
  -4   0   8          4.74          3.39         3.73 o
  -3   0   8          6.19         11.49         3.06 o
  -2   0   8        621.37        703.95        24.41 o
  -1   0   8       1164.71       1257.78        27.32 o
   0   0   8       1184.80       1270.23        30.44 o
   1   0   8       2130.21       2113.55        68.89 o
   2   0   8        985.01        912.03        36.75 o
   3   0   8        589.66        580.93        17.62 o
   4   0   8        378.15        370.49        14.54 o
   5   0   8        408.32        447.85        20.34 o
   6   0   8        595.76        609.68        33.55 o
   7   0   8        469.75        490.04        28.88 o
   8   0   8        309.79        286.20        61.69 o
 -10   1   8        359.70        298.53        32.24 o
  -9   1   8        625.65        677.24        40.97 o
  -8   1   8        397.79        442.00        32.80 o
  -7   1   8        176.58        190.47        16.88 o
  -6   1   8          3.20         11.90         7.62 o
  -5   1   8         48.78         29.39         5.27 o
  -4   1   8          5.19          1.89         2.63 o
  -3   1   8        796.67        812.33        28.58 o
  -2   1   8       1107.28       1104.55        29.20 o
  -1   1   8       1996.82       2238.67        44.98 o
   0   1   8       1976.34       1889.10        43.56 o
   1   1   8       1339.28       1304.17        31.56 o
   2   1   8        585.35        570.93        18.30 o
   3   1   8        485.18        441.72        14.23 o
   4   1   8        648.04        692.31        25.00 o
   5   1   8        858.85        840.15        34.82 o
   6   1   8        548.69        494.65        50.32 o
   7   1   8        240.69        214.25        36.18 o
   8   1   8         84.35         62.80        10.86 o
 -10   2   8        200.78        230.06        45.86 o
  -9   2   8        205.23        202.46        20.87 o
  -8   2   8         54.61         45.01         9.34 o
  -7   2   8          5.27          2.52         4.42 o
  -6   2   8          9.12         22.15         5.10 o
  -5   2   8         71.48        101.03         7.30 o
  -4   2   8        172.59        137.53         8.31 o
  -3   2   8       1730.00       1706.61        61.18 o
  -2   2   8       2713.52       2901.44        59.08 o
  -1   2   8       2107.80       1890.35        65.89 o
   0   2   8       1205.40       1157.74        26.08 o
   1   2   8        805.76        768.03        29.07 o
   2   2   8        530.35        441.84        41.02 o
   3   2   8        801.55        820.20        22.62 o
   4   2   8        699.79        647.47        20.95 o
   5   2   8        543.18        535.93        20.00 o
   6   2   8        246.01        221.02        19.71 o
   7   2   8         51.94         35.70         8.64 o
  -9   3   8         47.68         47.57         9.52 o
  -8   3   8          0.91         10.84         7.62 o
  -7   3   8          5.42          9.33         4.15 o
  -6   3   8        133.30        151.79        13.32 o
  -5   3   8        931.66        802.67        58.03 o
  -4   3   8       1724.58       1889.78        53.48 o
  -3   3   8       2739.61       2513.09       162.86 o
  -2   3   8       1773.95       1841.13        79.88 o
  -1   3   8        860.96        995.86        59.35 o
   0   3   8        303.60        302.93        44.79 o
   1   3   8        274.04        286.60        45.79 o
   2   3   8        300.50        339.75        13.02 o
   3   3   8        272.84        250.95         7.70 o
   4   3   8        403.89        403.69        14.32 o
   5   3   8        209.46        192.16        10.99 o
   6   3   8         36.83         31.02         7.87 o
   7   3   8         12.70         10.31         5.68 o
  -9   4   8          0.67          5.59         7.60 o
  -8   4   8          8.68         12.03         4.95 o
  -7   4   8        242.55        233.09        14.96 o
  -6   4   8       1040.95        942.42        32.85 o
  -5   4   8       1545.76       1603.60        41.73 o
  -4   4   8       1563.51       1607.19        45.91 o
  -3   4   8       1223.66       1229.68        52.29 o
  -2   4   8        240.46        289.16        26.80 o
  -1   4   8         45.54         46.09        15.01 o
   0   4   8        184.82        232.84        45.90 o
   1   4   8        167.21        209.49        45.73 o
   2   4   8        216.36        183.16        27.16 o
   3   4   8        262.84        263.17        21.95 o
   4   4   8        163.49        143.58         7.01 o
   5   4   8         42.88         46.38        20.14 o
   6   4   8         19.93         36.19        19.18 o
  -9   5   8         42.93         23.49        13.27 o
  -8   5   8        239.29        241.11        16.65 o
  -7   5   8        800.07        816.93        45.09 o
  -6   5   8        991.01       1024.97        33.47 o
  -5   5   8        854.09        880.20        46.12 o
  -4   5   8        421.61        451.36        32.05 o
  -3   5   8         59.72         71.66        14.06 o
  -2   5   8         92.00         76.43        19.35 o
  -1   5   8         57.85         66.56        30.79 o
   0   5   8         79.40         96.28        35.89 o
   1   5   8        289.26        251.67        34.12 o
   2   5   8        310.70        355.25        41.44 o
   3   5   8        160.49        147.04        29.86 o
   4   5   8        137.01        106.92        46.62 o
   5   5   8         34.29         51.43        38.55 o
  -8   6   8        381.31        415.25        28.76 o
  -7   6   8        604.92        550.53        66.60 o
  -6   6   8        443.49        497.35        85.54 o
  -5   6   8        206.79        235.30        28.22 o
  -4   6   8         72.36         79.93        20.29 o
  -3   6   8         27.16         15.46        12.17 o
  -2   6   8          3.61         -0.24         9.43 o
  -1   6   8         54.01         54.78        32.43 o
   0   6   8        489.12        480.40        48.54 o
   1   6   8        344.16        410.86        47.63 o
   2   6   8        272.25        308.07        69.46 o
   3   6   8        183.94        207.96        64.06 o
   4   6   8         81.51         99.73        30.47 o
  -6   7   8          5.33         14.24        15.06 o
  -5   7   8          0.87          9.32        11.75 o
  -4   7   8          2.23         -2.34         9.13 o
  -3   7   8         13.06         18.30        23.20 o
  -2   7   8        240.73        224.48        35.22 o
  -1   7   8        428.91        446.70        50.59 o
   0   7   8        456.23        491.72        55.86 o
   1   7   8        332.29        368.81        80.95 o
   2   7   8        140.94        195.66        39.01 o
   3   7   8         79.03         89.04        30.36 o
  -6   8   8          1.84         -5.55        12.94 o
  -5   8   8          4.47         12.95        20.84 o
  -4   8   8         58.80         55.35        40.19 o
  -3   8   8        276.81        291.47        69.03 o
  -2   8   8        423.37        461.71        54.75 o
  -1   8   8        472.78        543.10        62.53 o
   0   8   8        312.50        394.42        88.29 o
   1   8   8         85.39        122.19        33.98 o
   0 -11   9        691.34        697.70        71.19 o
   1 -11   9        266.38        319.16        48.54 o
   2 -11   9         62.86         62.27        27.47 o
   3 -11   9         42.68         53.64        51.75 o
  -3 -10   9        832.64        621.88       396.16 o
  -2 -10   9       1027.63       1000.10        71.39 o
  -1 -10   9        554.16        551.91        50.14 o
   0 -10   9        193.54        200.42        30.72 o
   1 -10   9         25.33          8.66        19.12 o
   2 -10   9         12.78         11.90        20.57 o
   3 -10   9         92.03         87.80        24.05 o
   4 -10   9        196.30        205.87        48.29 o
   5 -10   9        327.10        296.18        54.13 o
  -4  -9   9        775.68        686.17       130.07 o
  -3  -9   9        895.55        835.00       137.81 o
  -2  -9   9        521.45        495.34        53.35 o
  -1  -9   9         97.21        109.66        26.89 o
   0  -9   9          5.39          2.25        12.36 o
   1  -9   9         14.59         18.27        15.62 o
   2  -9   9        149.71        175.40        26.65 o
   3  -9   9        396.87        487.85        44.30 o
   4  -9   9        521.31        510.73        59.89 o
   5  -9   9        432.48        367.08        55.16 o
   6  -9   9        172.44        236.03        47.62 o
  -6  -8   9        690.67        533.26        79.41 o
  -5  -8   9       1369.66       1060.13        80.01 o
  -4  -8   9       1297.14       1064.44        79.86 o
  -3  -8   9        458.26        413.89        55.07 o
  -2  -8   9         33.44         26.82        18.67 o
  -1  -8   9         16.27         20.46        11.45 o
   0  -8   9          3.63          1.04         5.89 o
   1  -8   9        244.80        287.76        29.86 o
   2  -8   9        952.32       1077.92        62.38 o
   3  -8   9       1269.28       1292.19       104.31 o
   4  -8   9        757.51        770.86       108.72 o
   5  -8   9        346.11        400.98        84.06 o
   6  -8   9         94.24         -0.38        13.62 o
   7  -8   9         26.96          4.63        23.08 o
  -6  -7   9        863.71        711.95        67.93 o
  -5  -7   9        426.49        375.96        28.13 o
  -4  -7   9         34.45         29.93        18.79 o
  -3  -7   9          8.24          7.92         5.50 o
  -2  -7   9          8.14          7.60         2.35 o
  -1  -7   9         82.27         83.40        16.09 o
   0  -7   9        491.61        565.95        46.25 o
   1  -7   9       1767.51       1874.19        83.59 o
   2  -7   9       1472.13       1563.56        74.34 o
   3  -7   9        878.45       1042.24       112.19 o
   4  -7   9        532.31        608.44        56.59 o
   5  -7   9        196.10        228.36        37.01 o
   6  -7   9         40.89          0.63         8.23 o
   7  -7   9         93.61         56.40        48.78 o
  -7  -6   9        401.39        346.11        30.21 o
  -6  -6   9        116.15        104.94        23.03 o
  -5  -6   9          4.36          4.34         5.90 o
  -4  -6   9         68.56         74.05         8.29 o
  -3  -6   9          7.33         12.61         3.79 o
  -2  -6   9        283.13        325.17        17.34 o
  -1  -6   9       1226.52       1260.87        83.23 o
   0  -6   9       2376.12       2542.44       102.15 o
   1  -6   9       2921.14       3189.90       124.67 o
   2  -6   9       1376.29       1559.86        78.01 o
   3  -6   9        573.45        586.59        47.57 o
   4  -6   9        124.69        130.47        40.78 o
   5  -6   9         38.48         31.89        18.39 o
   6  -6   9        112.86         67.91        48.82 o
   7  -6   9        247.31        256.28        28.23 o
  -8  -5   9        208.64        211.09        28.10 o
  -7  -5   9         84.63         64.39        11.87 o
  -6  -5   9          6.65          9.42         5.25 o
  -5  -5   9          2.24          1.92         3.46 o
  -4  -5   9         27.98         23.96         6.31 o
  -3  -5   9        721.06        746.21        33.81 o
  -2  -5   9       2363.64       2420.27       101.93 o
  -1  -5   9       3946.38       4049.66       106.38 o
   0  -5   9       3646.12       3961.01       147.04 o
   1  -5   9       2799.44       3251.04       152.58 o
   2  -5   9        469.50        480.14        15.31 o
   3  -5   9        171.41        153.67         6.45 o
   4  -5   9         91.33         73.46         4.92 o
   5  -5   9        144.13        132.51        10.16 o
   6  -5   9        277.06        229.21        15.93 o
   7  -5   9        295.73        295.12        35.60 o
   8  -5   9        121.38        135.10        28.60 o
  -8  -4   9         37.04         19.11        11.55 o
  -7  -4   9          2.05          0.58         3.84 o
  -6  -4   9          3.04          3.06         5.74 o
  -5  -4   9        126.00        107.60        10.60 o
  -4  -4   9        619.48        636.49        27.72 o
  -3  -4   9       3006.94       3006.77       119.40 o
  -2  -4   9       4270.83       4442.44       144.68 o
  -1  -4   9       3282.09       3508.11       107.80 o
   0  -4   9       1670.95       1866.36        66.87 o
   1  -4   9        328.31        347.55        14.14 o
   2  -4   9         34.09         35.73         5.74 o
   3  -4   9         13.11         20.63         3.49 o
   4  -4   9        212.64        217.76        14.49 o
   5  -4   9        472.65        422.57        19.06 o
   6  -4   9        520.93        547.81        39.98 o
   7  -4   9        339.43        381.40        37.86 o
   8  -4   9        100.12        130.60        21.35 o
  -9  -3   9         14.56          7.12         8.85 o
  -8  -3   9         16.27          9.36         7.02 o
  -7  -3   9         55.29         50.62        12.41 o
  -6  -3   9        347.07        302.82        22.46 o
  -5  -3   9       1687.03       1686.78        80.10 o
  -4  -3   9       3500.37       3298.66       158.44 o
  -3  -3   9       3892.78       4016.67       143.74 o
  -2  -3   9       2227.57       2502.12        96.50 o
  -1  -3   9        485.13        574.80        23.25 o
   0  -3   9          8.21         26.53        10.58 o
   1  -3   9         12.34         14.88         4.91 o
   2  -3   9         38.04         48.80         7.35 o
   3  -3   9        812.58        788.12        42.28 o
   4  -3   9        761.60        720.12        37.05 o
   5  -3   9        641.18        638.07        21.75 o
   6  -3   9        476.93        475.70        47.51 o
   7  -3   9        157.44        214.60        25.76 o
   8  -3   9         40.55         58.36        16.95 o
  -9  -2   9         26.36         34.75        14.63 o
  -8  -2   9        135.71        103.55        38.20 o
  -7  -2   9        394.39        385.77        26.42 o
  -6  -2   9       1557.84       1591.76        66.84 o
  -5  -2   9       2474.18       2301.66       139.85 o
  -4  -2   9       2374.11       2565.83       132.95 o
  -3  -2   9       1280.24       1347.97        52.78 o
  -2  -2   9         16.85         22.26         9.14 o
  -1  -2   9        107.45        102.99         6.41 o
   0  -2   9         53.96         56.04         6.88 o
   1  -2   9         57.27         81.76         6.63 o
   2  -2   9        620.44        579.83        26.00 o
   3  -2   9       1385.62       1359.36        57.59 o
   4  -2   9       1496.46       1434.93        45.68 o
   5  -2   9        809.35        816.87        33.65 o
   6  -2   9        232.75        278.08        20.64 o
   7  -2   9         68.52         81.42        13.93 o
   8  -2   9         28.00         37.59        16.39 o
  -9  -1   9         23.14         12.26         7.92 o
  -8  -1   9        285.54        325.82        23.51 o
  -7  -1   9        894.69        902.17        48.93 o
  -6  -1   9       1408.47       1301.89        48.00 o
  -5  -1   9       1008.61       1076.99        68.90 o
  -4  -1   9        565.48        493.47        26.10 o
  -3  -1   9         27.66         29.68         7.56 o
  -2  -1   9        201.39        208.34        10.07 o
  -1  -1   9         78.22         82.99         7.11 o
   0  -1   9         54.27         69.66         6.89 o
   1  -1   9        590.82        562.73        32.95 o
   2  -1   9       1608.53       1522.78        50.29 o
   3  -1   9       1911.13       1867.89        58.12 o
   4  -1   9        866.03        861.88        25.22 o
   5  -1   9        268.81        320.76        16.56 o
   6  -1   9        109.35        116.15        20.97 o
   7  -1   9         37.28         34.20        12.79 o
   8  -1   9         43.72         44.83        12.36 o
  -9   0   9        183.75        173.63        65.21 o
  -8   0   9        685.48        598.79        31.40 o
  -7   0   9        788.26        783.20        32.80 o
  -6   0   9        389.91        427.16        20.73 o
  -5   0   9         53.04         23.03         6.00 o
  -4   0   9         50.86         35.40         6.00 o
  -3   0   9        134.74        189.28        14.08 o
  -2   0   9         59.77         68.37         6.36 o
  -1   0   9       1196.12       1303.30        28.57 o
   0   0   9       2317.81       2223.89        55.75 o
   1   0   9       3436.82       3515.21        86.71 o
   2   0   9       2697.27       2657.27        79.34 o
   3   0   9        902.65        860.85        29.81 o
   4   0   9        215.43        235.55        12.45 o
   5   0   9         38.01         36.81         7.75 o
   6   0   9         58.28         63.77        13.41 o
   7   0   9         93.83         72.72        17.00 o
  -9   1   9        264.66        241.96        20.58 o
  -8   1   9        439.37        494.25        30.81 o
  -7   1   9        240.43        238.83        19.18 o
  -6   1   9         22.12         23.09         6.45 o
  -5   1   9          3.75          9.37         5.07 o
  -4   1   9         56.40         31.17         5.91 o
  -3   1   9        232.77        288.39        22.17 o
  -2   1   9       1620.54       1613.44        35.98 o
  -1   1   9       3395.74       3350.86        80.83 o
   0   1   9       3788.51       4135.83        98.80 o
   1   1   9       2566.42       2658.12        61.16 o
   2   1   9        697.05        707.99        27.32 o
   3   1   9         70.39         82.60         8.30 o
   4   1   9          5.51          4.82         4.09 o
   5   1   9         24.91         23.19         8.15 o
   6   1   9        102.72         64.33        23.92 o
   7   1   9        126.27        105.37        22.58 o
  -9   2   9        164.13        185.68        25.99 o
  -8   2   9        126.71        118.10        12.34 o
  -7   2   9         37.60         44.84         8.39 o
  -6   2   9          2.42          3.39         4.13 o
  -5   2   9        180.18        167.62        11.35 o
  -4   2   9        481.70        539.18        30.11 o
  -3   2   9       1733.68       1529.63        92.39 o
  -2   2   9       3836.89       3847.77       102.04 o
  -1   2   9       3265.45       3342.74       104.18 o
   0   2   9       1298.65       1181.40        67.79 o
   1   2   9        376.91        354.25        12.26 o
   2   2   9         13.19         21.33         3.54 o
   3   2   9          0.81          6.12         4.65 o
   4   2   9          9.37         10.89         5.70 o
   5   2   9         75.15         58.61         7.09 o
   6   2   9        172.33        160.18        13.75 o
  -9   3   9         75.89         68.59        11.28 o
  -8   3   9         41.60         52.83         9.55 o
  -7   3   9          4.14          3.49         3.14 o
  -6   3   9         73.97         88.34        11.60 o
  -5   3   9        703.89        696.85        41.25 o
  -4   3   9       1309.30       1177.26       108.05 o
  -3   3   9       2393.53       2396.91        71.02 o
  -2   3   9       1919.84       2157.31       112.55 o
  -1   3   9        673.86        668.01        74.76 o
   0   3   9         38.92         45.42        24.98 o
   1   3   9          0.53         -2.74        11.66 o
   2   3   9          2.38         11.02        16.88 o
   3   3   9         18.69         20.43         8.51 o
   4   3   9        163.05        125.69        16.90 o
   5   3   9        299.10        293.53        39.40 o
   6   3   9        167.68        221.78        38.10 o
  -8   4   9         13.35         12.29         6.29 o
  -7   4   9        102.92        111.93        10.70 o
  -6   4   9        486.47        445.22        20.39 o
  -5   4   9       1182.48       1233.66        31.35 o
  -4   4   9       1228.87       1325.44        68.63 o
  -3   4   9        808.46        875.36        56.46 o
  -2   4   9         88.85         89.61        34.33 o
  -1   4   9         30.73         31.76        14.91 o
   0   4   9         73.86         92.02        20.96 o
   1   4   9          1.01          2.87        13.69 o
   2   4   9         49.41         64.68        20.15 o
   3   4   9        358.22        333.92        66.62 o
   4   4   9        413.40        479.29        52.73 o
   5   4   9        288.39        341.63        47.04 o
  -8   5   9         78.32         56.17        10.68 o
  -7   5   9        222.42        193.08        13.30 o
  -6   5   9        538.08        547.74        60.24 o
  -5   5   9        436.39        540.30        55.48 o
  -4   5   9         90.36         95.82        18.55 o
  -3   5   9         11.39          6.64         7.60 o
  -2   5   9          8.34          1.30         7.35 o
  -1   5   9          8.83         18.87        13.83 o
   0   5   9          3.03          6.01        17.37 o
   1   5   9        225.62        266.25        38.48 o
   2   5   9        532.42        510.27        56.28 o
   3   5   9        487.10        547.51        62.03 o
   4   5   9        386.55        461.92        59.72 o
  -7   6   9        265.85        261.00        46.42 o
  -6   6   9        252.19        235.14        68.64 o
  -5   6   9         75.70         97.91        22.18 o
  -4   6   9         20.79         22.03        12.89 o
  -3   6   9          0.30          0.35         6.52 o
  -2   6   9          2.42          6.14        10.79 o
  -1   6   9         68.49         74.96        24.49 o
   0   6   9        417.95        507.06        92.58 o
   1   6   9        724.37        832.83        80.56 o
   2   6   9        537.20        631.24       110.76 o
   3   6   9        357.87        481.83       101.51 o
  -6   7   9         83.78         69.83        47.22 o
  -5   7   9          6.08          8.54        12.87 o
  -4   7   9          2.37         16.49        17.85 o
  -3   7   9         20.74         32.39        18.76 o
  -2   7   9        195.94        207.88        38.71 o
  -1   7   9        472.37        610.42       108.22 o
   0   7   9        638.22        780.68        81.09 o
   1   7   9        519.58        646.64       120.88 o
  -3   8   9        212.04        205.82        42.66 o
  -2   8   9        399.13        421.24        94.68 o
  -1   8   9        417.48        478.51        63.53 o
  -2 -10  10        789.06        665.12        60.34 o
  -1 -10  10        580.09        572.59        54.43 o
   0 -10  10        116.06        112.41        43.77 o
   1 -10  10          7.46          8.26        11.97 o
   2 -10  10          7.91         15.67        14.05 o
   3 -10  10          4.97         -2.83        16.02 o
  -3  -9  10        487.33        427.95       103.41 o
  -2  -9  10        403.66        392.21        49.24 o
  -1  -9  10         66.24         62.10        19.12 o
   0  -9  10          1.22          5.77         9.36 o
   1  -9  10         11.04         12.91        12.22 o
   2  -9  10          7.02          7.18        13.10 o
   3  -9  10        250.75        290.09        45.25 o
   4  -9  10        528.03        596.67       110.02 o
   5  -9  10        593.99        641.23       123.54 o
  -5  -8  10        421.84        408.21        63.36 o
  -4  -8  10        543.67        451.77        62.61 o
  -3  -8  10        194.46        213.33        42.20 o
  -2  -8  10         32.46         36.92        14.83 o
  -1  -8  10          2.48         11.40        12.83 o
   0  -8  10          3.51          5.63        10.33 o
   1  -8  10        157.82        176.51        31.55 o
   2  -8  10        746.61        761.62        54.20 o
   3  -8  10       1297.92       1357.16        92.21 o
   4  -8  10       1038.11       1082.39        92.98 o
   5  -8  10        618.95        668.98        72.58 o
   6  -8  10        237.05        271.13        50.45 o
  -6  -7  10        608.12        465.78        50.96 o
  -5  -7  10        535.97        436.91        31.58 o
  -4  -7  10        205.44        197.88        22.29 o
  -3  -7  10         31.58         13.81         7.58 o
  -2  -7  10          9.27          6.21         1.91 o
  -1  -7  10         73.52         82.26        20.79 o
   0  -7  10        687.31        641.57        51.15 o
   1  -7  10       1665.82       1790.77        87.29 o
   2  -7  10       2281.58       2651.24       122.03 o
   3  -7  10       1532.94       1610.67       110.49 o
   4  -7  10        679.11        675.40        63.99 o
   5  -7  10        178.90        170.57        35.14 o
   6  -7  10          4.49         -2.10        10.51 o
  -6  -6  10        311.79        259.32        28.83 o
  -5  -6  10        176.31        160.32        14.44 o
  -4  -6  10         62.73         44.35         7.57 o
  -3  -6  10         36.17         49.22         9.68 o
  -2  -6  10        348.57        337.02        18.86 o
  -1  -6  10        989.08        980.66        59.56 o
   0  -6  10       1695.22       1788.10        90.38 o
   1  -6  10       2256.67       2586.30       124.03 o
   2  -6  10       1544.43       1660.33        84.71 o
   3  -6  10        497.29        509.22        73.96 o
   4  -6  10         54.16         81.67        22.42 o
   5  -6  10          0.96          2.57         9.16 o
   6  -6  10          1.07          1.06         8.37 o
   7  -6  10         47.56         14.85        16.01 o
  -7  -5  10        249.26        200.17        19.03 o
  -6  -5  10        191.46        189.39        16.90 o
  -5  -5  10        115.89        111.69        17.50 o
  -4  -5  10        242.20        253.75        22.66 o
  -3  -5  10        496.89        475.05        31.46 o
  -2  -5  10       1338.00       1402.72        53.19 o
  -1  -5  10       2309.34       2373.90       106.13 o
   0  -5  10       1907.52       1982.14        89.84 o
   1  -5  10       1233.14       1299.29        55.78 o
   2  -5  10        280.46        289.43        12.43 o
   3  -5  10         18.98         11.43         3.87 o
   4  -5  10         22.11         17.44         5.28 o
   5  -5  10          1.84          3.94         4.11 o
   6  -5  10         54.68         45.64        25.90 o
   7  -5  10        218.03        228.15        26.25 o
  -8  -4  10        157.37        160.10        19.87 o
  -7  -4  10        175.54        172.33        16.77 o
  -6  -4  10        104.65        105.45        12.23 o
  -5  -4  10        208.14        228.98        24.06 o
  -4  -4  10        434.51        394.75        28.99 o
  -3  -4  10       1222.48       1323.97        47.83 o
  -2  -4  10       2463.80       2545.89       101.76 o
  -1  -4  10       1579.39       1733.16        75.34 o
   0  -4  10        788.73        830.83        42.30 o
   1  -4  10        161.70        179.91        11.40 o
   2  -4  10         93.75         90.09         9.04 o
   3  -4  10         59.19         61.44        12.26 o
   4  -4  10         41.57         38.27         7.93 o
   5  -4  10        215.90        210.92        17.43 o
   6  -4  10        400.85        362.07        24.63 o
   7  -4  10        385.03        410.32        36.08 o
  -8  -3  10         56.89         41.80        18.29 o
  -7  -3  10         67.97         46.70        25.27 o
  -6  -3  10         45.80         31.57        17.08 o
  -5  -3  10        334.64        311.52        17.89 o
  -4  -3  10        970.15       1082.11        43.93 o
  -3  -3  10       1529.57       1508.91        72.26 o
  -2  -3  10       1196.15       1286.43        52.04 o
  -1  -3  10        394.79        423.41        33.16 o
   0  -3  10         32.31         28.78         5.83 o
   1  -3  10         97.58         92.44         8.49 o
   2  -3  10         12.44         16.43         4.30 o
   3  -3  10        170.57        163.29        13.01 o
   4  -3  10        775.34        781.62        51.60 o
   5  -3  10        955.55        952.82        66.16 o
   6  -3  10        709.59        736.62        36.70 o
   7  -3  10        314.03        307.14        28.24 o
  -8  -2  10         50.37         33.49        20.19 o
  -7  -2  10        112.95         61.16        23.70 o
  -6  -2  10        291.78        288.05        25.76 o
  -5  -2  10        732.93        798.25        46.02 o
  -4  -2  10        776.32        773.26        38.95 o
  -3  -2  10        707.67        805.02        47.21 o
  -2  -2  10        288.67        290.97        16.68 o
  -1  -2  10          5.60         13.23         4.22 o
   0  -2  10        130.48        138.77         8.25 o
   1  -2  10        420.72        382.14        14.98 o
   2  -2  10        615.49        633.37        30.40 o
   3  -2  10       1457.38       1473.99        63.06 o
   4  -2  10       1518.52       1484.84        59.66 o
   5  -2  10        876.16        882.89        36.60 o
   6  -2  10        323.75        336.74        19.32 o
   7  -2  10         79.09         53.82        25.52 o
  -8  -1  10         29.81         11.07        10.05 o
  -7  -1  10        239.48        277.15        27.34 o
  -6  -1  10        443.98        411.06        33.78 o
  -5  -1  10        643.03        609.77        24.35 o
  -4  -1  10        505.98        611.10        34.94 o
  -3  -1  10        168.12        162.06        16.10 o
  -2  -1  10          8.29         17.23         3.76 o
  -1  -1  10         74.44         74.40         9.34 o
   0  -1  10        435.70        409.53        16.97 o
   1  -1  10       1279.07       1414.18        40.96 o
   2  -1  10       2176.82       2218.10        59.92 o
   3  -1  10       2142.43       2060.82        74.69 o
   4  -1  10       1008.89       1028.43        51.37 o
   5  -1  10        212.43        184.94        14.46 o
   6  -1  10         17.76         11.21         7.27 o
   7  -1  10          0.39         -4.85         5.68 o
  -8   0  10        148.05        146.73        17.45 o
  -7   0  10        309.66        264.33        20.73 o
  -6   0  10        543.65        523.25        36.85 o
  -5   0  10        251.60        263.01        17.92 o
  -4   0  10        164.71        172.21        18.37 o
  -3   0  10         54.75         63.66        23.47 o
  -2   0  10        124.64         99.89         8.58 o
  -1   0  10        516.90        538.34        24.95 o
   0   0  10       1419.86       1531.85        36.58 o
   1   0  10       1770.74       1759.48        46.01 o
   2   0  10       1674.42       1720.23        48.32 o
   3   0  10        767.57        845.68        43.63 o
   4   0  10         95.76         86.62        10.20 o
   5   0  10          0.83         -0.05         2.38 o
   6   0  10          8.31          7.05         5.67 o
  -8   1  10        241.83        206.91        43.75 o
  -7   1  10        340.34        385.25        28.37 o
  -6   1  10        210.85        193.61        14.83 o
  -5   1  10        117.10        135.74         9.80 o
  -4   1  10        316.78        335.18        23.54 o
  -3   1  10        231.75        202.13        14.19 o
  -2   1  10        719.05        785.24        21.95 o
  -1   1  10       1445.45       1536.03        38.11 o
   0   1  10       1763.29       1808.24        57.54 o
   1   1  10       1037.29       1120.17        29.26 o
   2   1  10        300.66        318.54         9.88 o
   3   1  10         14.97         13.12         6.24 o
   4   1  10          5.88          3.62         3.92 o
   5   1  10          2.78          4.93         3.90 o
   6   1  10         25.81         16.25         7.67 o
  -8   2  10        311.52        317.93        26.09 o
  -7   2  10        286.23        283.17        25.57 o
  -6   2  10        261.52        297.32        16.18 o
  -5   2  10        122.69        117.58        11.86 o
  -4   2  10        392.94        354.32        24.75 o
  -3   2  10        416.46        424.73        23.96 o
  -2   2  10       1002.57        983.48        39.10 o
  -1   2  10       1118.39       1147.93        50.10 o
   0   2  10        407.88        402.94        32.60 o
   1   2  10         27.93         43.61         4.77 o
   2   2  10          1.02          1.84         1.78 o
   3   2  10         19.43          4.59         7.58 o
   4   2  10          0.70          2.74         7.81 o
   5   2  10         71.02         -1.45         7.95 o
  -8   3  10        218.04        209.81        16.67 o
  -7   3  10         99.46        118.75        11.79 o
  -6   3  10         59.59         45.43         6.87 o
  -5   3  10        162.18        163.39        17.78 o
  -4   3  10        446.15        487.19        43.98 o
  -3   3  10        434.04        408.56        33.97 o
  -2   3  10        830.38        818.77        90.09 o
  -1   3  10        266.11        266.49        33.22 o
   0   3  10         36.71         42.35        16.56 o
   1   3  10          0.80         -4.44        14.74 o
   2   3  10          3.18          9.69        10.74 o
   3   3  10         21.30         15.72        21.96 o
   4   3  10        150.39        174.48        32.19 o
   5   3  10        265.13        297.19        44.48 o
  -7   4  10         28.10         22.37        18.13 o
  -6   4  10         74.03         77.08        25.43 o
  -5   4  10        233.91        203.47        58.81 o
  -4   4  10        506.58        644.08        46.12 o
  -3   4  10        319.85        308.59        29.28 o
  -2   4  10        172.95        172.50        29.14 o
  -1   4  10         45.83         36.33        16.56 o
   0   4  10          6.74          1.56         8.08 o
   1   4  10         15.65         12.42        22.06 o
   2   4  10        153.38        160.42        30.97 o
   3   4  10        264.79        316.73        72.47 o
  -7   5  10         30.19         11.30        16.05 o
  -6   5  10        157.59        120.10        32.73 o
  -5   5  10        260.82        308.00        49.23 o
  -4   5  10        116.85        119.73        29.09 o
  -3   5  10         75.89         85.05        41.22 o
  -2   5  10         97.07         87.62        24.58 o
  -1   5  10         26.59         16.57        14.63 o
   0   5  10         64.90         79.00        25.86 o
   1   5  10        259.65        278.42        42.76 o
   2   5  10        352.62        383.24        53.39 o
   3   5  10        354.71        383.52        55.46 o
  -5   6  10        122.03        140.76        30.71 o
  -4   6  10        139.83        226.18        34.48 o
  -3   6  10         87.33         97.46        47.84 o
  -2   6  10         55.04         54.51        23.39 o
  -1   6  10        113.21        121.36        31.21 o
   0   6  10        216.46        222.39        72.60 o
   1   6  10        328.93        385.58        57.54 o
  -3   7  10         71.29         74.02        28.52 o
  -2   7  10        106.90         97.72        31.89 o
  -2  -9  11        339.72        288.22        45.32 o
  -1  -9  11        330.27        351.96        41.33 o
   0  -9  11        167.76        150.71        47.23 o
   1  -9  11        106.58         90.47        28.45 o
   2  -9  11         66.00         77.12        22.77 o
   3  -9  11        164.24        218.93        42.88 o
  -4  -8  11        345.37        299.27        88.82 o
  -3  -8  11        452.89        262.98       148.33 o
  -2  -8  11        419.80        426.37        40.70 o
  -1  -8  11        263.09        239.48        30.86 o
   0  -8  11         69.84         63.94        22.28 o
   1  -8  11         96.75        128.16        24.93 o
   2  -8  11        292.48        365.30        46.62 o
   3  -8  11        499.34        536.58        46.76 o
   4  -8  11        557.52        590.63        68.20 o
  -5  -7  11        437.78        412.80        60.87 o
  -4  -7  11        536.21        475.20       102.34 o
  -3  -7  11        465.38        501.15        97.23 o
  -2  -7  11        310.70        270.58        35.03 o
  -1  -7  11        214.61        288.94        48.14 o
   0  -7  11        309.75        327.09        50.95 o
   1  -7  11        483.60        525.63        50.49 o
   2  -7  11        584.57        639.07        54.04 o
   3  -7  11        654.84        725.21        60.38 o
   4  -7  11        417.33        476.13        90.13 o
   5  -7  11        161.77          1.07        15.74 o
  -6  -6  11        454.43        380.02        49.77 o
  -5  -6  11        628.85        579.39        45.20 o
  -4  -6  11        526.96        497.65        26.59 o
  -3  -6  11        303.37        277.17        16.24 o
  -2  -6  11        278.66        301.38        19.38 o
  -1  -6  11        400.69        440.13        51.76 o
   0  -6  11        466.92        474.06        54.32 o
   1  -6  11        679.12        783.14        71.27 o
   2  -6  11        822.25        892.16        58.37 o
   3  -6  11        416.90        460.75        34.89 o
   4  -6  11        101.89        101.25        25.91 o
   5  -6  11          8.90         -1.08        13.61 o
   6  -6  11          3.44         -4.18        18.91 o
  -6  -5  11        510.08        491.98        41.45 o
  -5  -5  11        414.11        410.00        25.56 o
  -4  -5  11        234.98        212.98        16.33 o
  -3  -5  11         94.64        109.17        10.80 o
  -2  -5  11        135.46        135.67        12.49 o
  -1  -5  11        249.86        254.71        36.83 o
   0  -5  11        465.44        490.71        37.54 o
   1  -5  11        447.87        497.74        31.41 o
   2  -5  11        432.89        435.33        17.28 o
   3  -5  11         95.53         83.06         5.84 o
   4  -5  11         24.59         39.06        16.62 o
   5  -5  11         58.22          3.31        15.78 o
   6  -5  11         84.93          3.00        16.64 o
  -7  -4  11        442.63        438.82        30.93 o
  -6  -4  11        384.03        332.92        29.10 o
  -5  -4  11        108.48         85.56        20.96 o
  -4  -4  11         42.37         53.67        16.04 o
  -3  -4  11         33.82         38.04        12.82 o
  -2  -4  11        196.33        210.21        16.62 o
  -1  -4  11        542.17        560.99        30.69 o
   0  -4  11        617.02        670.55        39.07 o
   1  -4  11        487.70        492.66        17.35 o
   2  -4  11        165.91        148.73        12.52 o
   3  -4  11         15.80         16.98         6.16 o
   4  -4  11         73.74         68.36        10.35 o
   5  -4  11        142.72        132.76        69.76 o
   6  -4  11        244.81        246.17        47.29 o
  -7  -3  11         88.85         56.86        23.65 o
  -6  -3  11         19.87         14.55         8.35 o
  -5  -3  11          2.45          4.92         5.97 o
  -4  -3  11         61.66         45.33         9.52 o
  -3  -3  11        154.24        189.56        19.67 o
  -2  -3  11        650.02        661.95        30.17 o
  -1  -3  11        606.20        689.27        31.83 o
   0  -3  11        268.69        267.93        12.66 o
   1  -3  11        133.37        128.12         8.76 o
   2  -3  11        223.21        243.60        12.93 o
   3  -3  11        151.35        150.61        14.53 o
   4  -3  11        317.44        308.80        21.50 o
   5  -3  11        421.72        428.92        35.14 o
   6  -3  11        290.05        263.66        24.59 o
  -7  -2  11          2.18          6.18         6.43 o
  -6  -2  11          1.96          0.31         3.37 o
  -5  -2  11         66.96         61.40        14.13 o
  -4  -2  11        331.85        359.36        27.58 o
  -3  -2  11        702.49        700.71        31.93 o
  -2  -2  11        795.47        845.26        27.54 o
  -1  -2  11        409.60        383.97        32.03 o
   0  -2  11        301.48        299.44        14.39 o
   1  -2  11        328.81        368.22        16.28 o
   2  -2  11        228.31        251.34        15.90 o
   3  -2  11        343.24        335.75        18.03 o
   4  -2  11        619.60        609.02        37.93 o
   5  -2  11        368.62        354.28        26.66 o
   6  -2  11        172.16        177.49        16.71 o
  -7  -1  11         10.92          8.34         6.62 o
  -6  -1  11         91.00         56.98        29.67 o
  -5  -1  11        447.26        445.30        28.52 o
  -4  -1  11       1079.16       1165.14        57.62 o
  -3  -1  11       1281.19       1453.02        55.60 o
  -2  -1  11       1221.56       1152.49        42.37 o
  -1  -1  11        765.96        828.40        33.61 o
   0  -1  11        420.82        481.87        18.12 o
   1  -1  11        349.90        328.72        17.00 o
   2  -1  11        397.21        404.17        22.35 o
   3  -1  11        409.55        410.09        30.07 o
   4  -1  11        392.38        389.53        25.01 o
   5  -1  11        168.71        204.48        16.52 o
   6  -1  11         35.41          6.83        11.35 o
  -7   0  11        219.67        227.16        17.43 o
  -6   0  11        548.51        532.81        33.19 o
  -5   0  11        954.04       1045.94        47.72 o
  -4   0  11        753.77        777.65        40.86 o
  -3   0  11        733.77        729.18        33.05 o
  -2   0  11        380.30        429.43        18.42 o
  -1   0  11        161.87        168.18        11.56 o
   0   0  11        277.16        276.37        14.29 o
   1   0  11        339.31        349.22        13.42 o
   2   0  11        313.71        319.66        15.79 o
   3   0  11        291.60        260.11        19.36 o
   4   0  11        101.41         93.86        10.76 o
   5   0  11         12.62          2.89         4.66 o
  -7   1  11        431.45        423.04        25.51 o
  -6   1  11        542.02        575.27        28.36 o
  -5   1  11        504.26        513.95        44.33 o
  -4   1  11        391.15        479.41        24.99 o
  -3   1  11        173.11        178.81        29.89 o
  -2   1  11         22.83         10.70         3.25 o
  -1   1  11        103.43         99.84         5.05 o
   0   1  11        256.50        253.76        12.48 o
   1   1  11        316.51        315.17        12.59 o
   2   1  11        216.29        202.44         9.00 o
   3   1  11         89.03         90.62         7.33 o
   4   1  11         29.64         22.89        12.73 o
   5   1  11          5.18          4.33         8.90 o
  -7   2  11        386.37        377.87        21.79 o
  -6   2  11        312.31        298.38        14.92 o
  -5   2  11        107.13        110.98        12.76 o
  -4   2  11         22.09         10.70         3.31 o
  -3   2  11         11.32          9.39         2.46 o
  -2   2  11         23.29         23.92        20.60 o
  -1   2  11        167.15        198.20        46.24 o
   0   2  11        286.43        327.75        57.68 o
   1   2  11        182.71        202.87        29.88 o
   2   2  11        161.20        163.98        27.67 o
   3   2  11        104.34         75.94        34.04 o
   4   2  11         35.51         60.66        20.37 o
  -7   3  11        167.20        190.01        40.16 o
  -6   3  11         24.23         28.02        18.73 o
  -5   3  11          1.88         -3.25        17.38 o
  -4   3  11          2.99          7.10         9.91 o
  -3   3  11         14.80         16.65        10.48 o
  -2   3  11        105.59         96.62        21.95 o
  -1   3  11        279.16        315.45        38.33 o
   0   3  11        266.36        289.68        39.10 o
   1   3  11        200.25        237.38        58.98 o
   2   3  11        132.68        160.02        30.77 o
   3   3  11         84.55        108.55        44.95 o
  -6   4  11          2.78          2.94        11.23 o
  -5   4  11          2.35          8.22        23.18 o
  -4   4  11        138.49        131.43        26.71 o
  -3   4  11        222.80        272.66        67.76 o
  -2   4  11        332.13        324.56        65.97 o
  -1   4  11        408.59        416.15        49.65 o
   0   4  11        239.24        288.80        43.42 o
   1   4  11        101.61         88.02        45.90 o
   2   4  11        120.58        140.50        33.53 o
  -5   5  11        138.45         63.92        61.60 o
  -4   5  11        244.76        334.26        44.09 o
  -3   5  11        278.73        290.85        48.56 o
  -2   5  11        417.08        455.53        90.69 o
  -1   5  11        207.96        225.06        40.91 o
   0   5  11         98.16        122.63        33.73 o
   1   5  11         70.58         89.67        50.38 o
  -2  -8  12        840.82        748.38        59.60 o
  -1  -8  12        725.06        704.08        65.69 o
   0  -8  12        300.02        323.71        45.24 o
   1  -8  12         64.88         66.03        20.17 o
   2  -8  12         26.67         27.80        15.74 o
  -3  -7  12        755.41        682.31        53.38 o
  -2  -7  12        401.48        391.70        37.45 o
  -1  -7  12        144.80        124.19        26.93 o
   0  -7  12         14.09         14.82        11.01 o
   1  -7  12          7.63         -0.88         6.84 o
   2  -7  12         22.50          6.97         8.98 o
   3  -7  12        117.02        127.58        23.06 o
  -4  -6  12        672.53        661.85        75.79 o
  -3  -6  12        361.99        322.35        32.03 o
  -2  -6  12         85.89         47.14        36.33 o
  -1  -6  12          7.90          4.63         9.07 o
   0  -6  12          1.37         -0.41         5.94 o
   1  -6  12         20.71          3.46         8.81 o
   2  -6  12        215.07        214.72        40.33 o
   3  -6  12        389.59        397.44        34.59 o
   4  -6  12        275.01        327.04        44.21 o
  -5  -5  12        454.60        489.88        39.38 o
  -4  -5  12        210.24        197.14        23.28 o
  -3  -5  12         21.85         13.21         7.94 o
  -2  -5  12          2.10         -2.12         6.91 o
  -1  -5  12          7.22          9.40         9.24 o
   0  -5  12         86.99         89.54        15.94 o
   1  -5  12        439.98        437.54        31.49 o
   2  -5  12        673.61        698.23        41.10 o
   3  -5  12        556.62        648.99        63.33 o
   4  -5  12        238.29        242.09        36.14 o
  -6  -4  12        249.53        248.34        23.91 o
  -5  -4  12         64.38         42.25        10.71 o
  -4  -4  12          0.85          5.73         5.14 o
  -3  -4  12         10.23          7.20         5.57 o
  -2  -4  12          2.94          3.10         5.23 o
  -1  -4  12        247.63        252.77        25.54 o
   0  -4  12        861.14        876.47        64.35 o
   1  -4  12       1012.51       1047.76        37.00 o
   2  -4  12        878.43        948.34        30.25 o
   3  -4  12        416.43        420.81        20.03 o
   4  -4  12        126.91        145.51        15.50 o
   5  -4  12         68.80         -6.67        10.36 o
  -6  -3  12         15.06         10.58         9.51 o
  -5  -3  12          2.83          3.78         5.73 o
  -4  -3  12          2.49          2.01         4.60 o
  -3  -3  12         96.85         83.01        12.14 o
  -2  -3  12        724.45        740.06        29.64 o
  -1  -3  12       1581.50       1653.73        74.27 o
   0  -3  12       1276.57       1300.09        63.51 o
   1  -3  12        770.22        817.49        29.44 o
   2  -3  12        384.03        387.77        25.52 o
   3  -3  12         71.72         79.63         8.83 o
   4  -3  12         20.57         25.46         7.23 o
   5  -3  12         65.58         49.99         9.83 o
  -6  -2  12          2.54         -3.40         7.35 o
  -5  -2  12          3.05          5.68         6.41 o
  -4  -2  12        182.87        199.60        22.68 o
  -3  -2  12        558.92        559.82        23.60 o
  -2  -2  12        955.33        956.49        45.08 o
  -1  -2  12       1047.62       1057.47        83.42 o
   0  -2  12        640.65        672.36        33.59 o
   1  -2  12        251.07        257.24        14.69 o
   2  -2  12         50.79         61.65         6.92 o
   3  -2  12          3.17         11.35         4.86 o
   4  -2  12         27.95         21.10         7.74 o
   5  -2  12         73.05         54.05        11.44 o
  -6  -1  12         50.09         47.99        12.51 o
  -5  -1  12        265.92        287.57        37.79 o
  -4  -1  12        733.78        703.38        43.65 o
  -3  -1  12        979.19       1028.61        36.75 o
  -2  -1  12        904.54        897.51        28.58 o
  -1  -1  12        368.95        347.40        19.74 o
   0  -1  12         38.35         54.17         7.14 o
   1  -1  12          1.21          2.79         2.99 o
   2  -1  12          2.69          0.87         3.20 o
   3  -1  12         21.15         16.18         5.10 o
   4  -1  12        108.68        100.18        14.37 o
  -6   0  12        393.13        407.13        31.42 o
  -5   0  12        715.23        701.64        46.16 o
  -4   0  12        928.18       1046.87        47.12 o
  -3   0  12        631.37        615.64        21.54 o
  -2   0  12        233.63        253.25        15.77 o
  -1   0  12          4.03          7.19         3.48 o
   0   0  12         25.42         23.84         4.84 o
   1   0  12          1.20         -0.45         1.97 o
   2   0  12         54.13         35.13         4.84 o
   3   0  12        176.51        185.24        25.48 o
   4   0  12        305.44        281.19        32.15 o
  -6   1  12        442.56        460.95        38.99 o
  -5   1  12        458.81        473.66        28.70 o
  -4   1  12        250.73        223.36        15.81 o
  -3   1  12         59.07         -2.39         8.59 o
  -2   1  12          6.88         -2.63         7.07 o
  -1   1  12         28.10          0.42         5.06 o
   0   1  12         11.72          2.74         7.65 o
   1   1  12        133.86        128.64        24.55 o
   2   1  12        260.08        275.77        54.29 o
   3   1  12        321.29        347.94        39.39 o
  -6   2  12        231.12        156.40        60.40 o
  -5   2  12        113.89        106.00        29.56 o
  -4   2  12          4.07          8.69        21.14 o
  -3   2  12          0.20          5.87         8.71 o
  -2   2  12          1.00          4.73         8.75 o
  -1   2  12         68.24         67.60        19.51 o
   0   2  12        270.39        208.87        53.33 o
   1   2  12        444.89        502.11        52.59 o
   2   2  12        376.04        369.10        45.90 o
  -5   3  12          0.60          8.55        14.12 o
  -4   3  12          4.32          2.22         9.60 o
  -3   3  12         27.72         37.17        37.95 o
  -2   3  12         91.11         78.92        38.68 o
  -1   3  12        378.43        359.99        46.68 o
   0   3  12        589.16        646.47        64.93 o
   1   3  12        427.13        486.37        92.33 o
  -3   4  12        199.57        240.79        49.42 o
  -2   4  12        326.60        330.39        48.05 o
  -1   4  12        501.20        519.03        96.77 o
   0   4  12        331.11        356.24        52.68 o
  -2  -6  13         39.24         17.99        15.34 o
  -1  -6  13          1.23         -0.50         6.18 o
   0  -6  13          3.65         10.20        11.63 o
   1  -6  13          6.54          6.65        10.71 o
   2  -6  13        132.83        132.88        36.08 o
  -3  -5  13         48.73         13.02        14.55 o
  -2  -5  13          4.82          0.94         4.98 o
  -1  -5  13          5.72          1.91         5.46 o
   0  -5  13         59.61         30.79        29.06 o
   1  -5  13        262.92        286.57        26.85 o
   2  -5  13        497.91        536.58        43.48 o
  -4  -4  13         54.09         40.94        11.26 o
  -3  -4  13         13.91          5.23         4.68 o
  -2  -4  13          9.10          0.95         4.77 o
  -1  -4  13        161.19        158.88        25.54 o
   0  -4  13        600.83        640.95        55.97 o
   1  -4  13        786.40        789.34        48.69 o
   2  -4  13        642.73        664.66        44.68 o
   3  -4  13        347.83        356.39        31.92 o
  -4  -3  13         35.26         19.48        12.36 o
  -3  -3  13         91.10         68.42        12.05 o
  -2  -3  13        402.86        423.38        40.76 o
  -1  -3  13        808.80        813.39        39.24 o
   0  -3  13        781.93        698.98        73.10 o
   1  -3  13        565.60        596.50        23.35 o
   2  -3  13        235.95        251.21        19.21 o
   3  -3  13         39.30         25.73         7.16 o
  -5  -2  13         73.59         42.21        39.51 o
  -4  -2  13        187.18        151.05        51.67 o
  -3  -2  13        525.77        558.45        30.13 o
  -2  -2  13        595.30        593.22        42.76 o
  -1  -2  13        682.79        628.84        64.96 o
   0  -2  13        422.12        419.61        17.70 o
   1  -2  13         75.98         80.13        10.73 o
   2  -2  13          4.25          7.70         5.58 o
   3  -2  13          0.55          1.37         3.22 o
  -5  -1  13         73.59         53.35        37.56 o
  -4  -1  13        166.14        174.26        17.79 o
  -3  -1  13        307.93        290.99        17.35 o
  -2  -1  13        376.36        396.48        20.86 o
  -1  -1  13        246.44        233.14        11.89 o
   0  -1  13         25.96         16.00         8.71 o
   1  -1  13          0.88          2.58         2.84 o
   2  -1  13          2.77          5.14         3.71 o
  -4   0  13        225.59        159.88        46.06 o
  -3   0  13        215.33        252.40        35.69 o
  -2   0  13         95.69          2.93        15.03 o
  -1   0  13         18.36         -2.47        10.61 o
   0   0  13          1.96          3.46         7.06 o
   1   0  13          1.45         -5.09         8.51 o
   2   0  13         61.39         61.79        18.34 o
  -4   1  13        143.21          3.97        11.60 o
  -3   1  13         54.94         13.78        22.29 o
  -2   1  13         10.65          7.23        18.81 o
  -1   1  13          1.23          7.40         9.07 o
   0   1  13         25.74         21.61        13.55 o
   1   1  13        156.42        165.29        29.32 o
  -3   2  13         13.82         -0.85        19.89 o
  -2   2  13         28.38         -0.78         7.84 o
  -1   2  13         65.73          6.91        10.40 o
                                           

#==============================================================================

#==============================================================================
# Additional structures and associated data_? identifiers
# should be added at this point if there is more than one 
# structure analysis in the CIF.

#==============================================================================
#     End of CIF
#==============================================================================
